# Supplementary material for: Stratification of knee osteoarthritis: two major patient subgroups identified by genome-wide expression analysis of articular cartilage
Source: Ann Rheum Dis. 2017 Dec 22;77(3):423. doi: 10.1136/annrheumdis-2017-212603 (PMC5867416; doi:10.1136/annrheumdis-2017-212603)
Supplement: Supplementary file 2 [file annrheumdis-2017-212603supp002.xlsx]

## Sheet: DiscoveryOAvsNonOADiffExp
gene_name	log2FoldChange	padj	EnsemblID
FGF1	2.64798	4.05764e-26	ENSG00000113578
DDIT4	-3.1975	4.05764e-26	ENSG00000168209
HAS2	2.36223	4.29972e-25	ENSG00000170961
SMOC2	2.56081	7.3424e-21	ENSG00000112562
GADD45A	-2.03688	2.11585e-18	ENSG00000116717
PLIN2	-1.34366	2.11585e-18	ENSG00000147872
TXNIP	-1.9984	2.11585e-18	ENSG00000265972
GADD45B	-2.60495	3.82829e-18	ENSG00000099860
INSC	2.54582	6.9439e-17	ENSG00000188487
PLOD2	1.45632	1.45745e-16	ENSG00000152952
POLR1E	-1.21236	3.49115e-16	ENSG00000137054
SRPX2	1.66718	1.47853e-15	ENSG00000102359
C10orf10	-2.45103	1.73236e-15	ENSG00000165507
C8B	3.34738	1.95286e-15	ENSG00000021852
TNFSF11	2.59146	3.75307e-15	ENSG00000120659
SLC3A2	-1.15677	6.11387e-15	ENSG00000168003
DNER	2.75847	6.89223e-15	ENSG00000187957
ASPN	2.31241	2.90903e-14	ENSG00000106819
CHST6	1.54494	4.92031e-14	ENSG00000183196
KBTBD6	1.09354	7.30797e-14	ENSG00000165572
KAL1	2.1498	7.68094e-14	ENSG00000011201
TSPAN2	1.96658	8.37093e-14	ENSG00000134198
SERPINA5	2.09547	1.04275e-13	ENSG00000188488
GLUL	-1.994	1.22224e-13	ENSG00000135821
RCC1	-1.31143	1.35359e-13	ENSG00000180198
CLEC3A	2.82335	1.43585e-13	ENSG00000166509
PDK4	-2.64017	1.78533e-13	ENSG00000004799
APOD	-2.7055	1.84686e-13	ENSG00000189058
ANP32B	-1.01548	2.06197e-13	ENSG00000136938
ADH5	-0.84769	2.0841e-13	ENSG00000197894
EIF4EBP3	-1.72747	3.85201e-13	ENSG00000243056
GINS3	1.39933	5.77292e-13	ENSG00000181938
CEBPD	-1.68415	5.77292e-13	ENSG00000221869
MT2A	-2.24809	7.95352e-13	ENSG00000125148
MT1M	-2.23227	1.1291e-12	ENSG00000205364
CH507-42P11.8	-2.46937	1.39023e-12	ENSG00000275993
GLRX	-1.96004	1.76065e-12	ENSG00000173221
MT1E	-2.3637	2.33232e-12	ENSG00000169715
RPLP0	-0.968933	4.18902e-12	ENSG00000089157
RPL35	-1.17426	5.1116e-12	ENSG00000136942
GDF15	-2.48531	7.03671e-12	ENSG00000130513
RPL27A	-1.03515	7.03671e-12	ENSG00000166441
RPS2	-1.17904	8.82919e-12	ENSG00000140988
FLRT1	2.8448	1.04948e-11	ENSG00000126500
PXYLP1	1.50849	1.04948e-11	ENSG00000155893
IMPDH2	-0.776443	1.48864e-11	ENSG00000178035
BFSP1	1.7228	1.5827e-11	ENSG00000125864
CISH	-1.9108	1.76106e-11	ENSG00000114737
RPL29	-1.02653	1.82114e-11	ENSG00000162244
AZGP1	-3.18056	2.02278e-11	ENSG00000160862
SLC25A6	-0.930368	2.02278e-11	ENSG00000169100
MATN3	2.30002	2.68723e-11	ENSG00000132031
RPL36	-1.25038	2.78988e-11	ENSG00000130255
DDIT3	-1.26372	2.90909e-11	ENSG00000175197
SDC1	1.87999	3.20843e-11	ENSG00000115884
ANGPTL2	1.61483	3.20843e-11	ENSG00000136859
RPL7A	-0.893143	3.20843e-11	ENSG00000148303
RPL7A	-0.893143	3.20843e-11	ENSG00000280858
KLF15	-1.79053	3.56378e-11	ENSG00000163884
CHST10	1.57405	3.90451e-11	ENSG00000115526
RPL32	-1.09747	6.1722e-11	ENSG00000144713
SERTAD4	1.7378	6.18707e-11	ENSG00000082497
SERTAD4	1.7378	6.18707e-11	ENSG00000281230
RPL18A	-1.12188	6.31074e-11	ENSG00000105640
ZFAND5	-1.38703	6.5569e-11	ENSG00000107372
ATRNL1	2.0903	6.5569e-11	ENSG00000107518
GPX3	-2.14453	6.5569e-11	ENSG00000211445
RPS16	-1.14438	8.77784e-11	ENSG00000105193
IFITM10	1.73875	9.97511e-11	ENSG00000281618
UBXN1	-1.02731	1.02052e-10	ENSG00000162191
RPL28	-1.07327	1.07138e-10	ENSG00000108107
HILPDA	-2.11963	1.09519e-10	ENSG00000135245
RPS10	-1.04035	1.14299e-10	ENSG00000124614
RND1	-2.32087	1.14299e-10	ENSG00000172602
CCDC129	2.2734	1.15638e-10	ENSG00000180347
MT1X	-1.82525	1.15638e-10	ENSG00000187193
RPSA	-0.988214	1.23691e-10	ENSG00000168028
EEF1D	-0.92068	1.30125e-10	ENSG00000104529
UBA52	-0.870582	1.30125e-10	ENSG00000221983
FTL	-1.03396	1.32703e-10	ENSG00000087086
FAM169A	3.07088	1.3277e-10	ENSG00000198780
CILP	1.97595	1.41056e-10	ENSG00000138615
RPL13A	-0.963012	1.70241e-10	ENSG00000142541
KLF9	-1.46124	1.72003e-10	ENSG00000119138
EIF3D	-0.800518	1.80474e-10	ENSG00000100353
NCAM1	2.05512	1.85351e-10	ENSG00000149294
CYP4B1	-3.74541	2.46053e-10	ENSG00000142973
IRF2BPL	-0.887876	2.50498e-10	ENSG00000119669
WIF1	2.50413	2.50498e-10	ENSG00000156076
SBSPON	1.93154	2.58762e-10	ENSG00000164764
RPL37	-1.09216	3.10957e-10	ENSG00000145592
ATOH8	-1.8712	3.28224e-10	ENSG00000168874
IFITM10	1.69887	3.43633e-10	ENSG00000244242
RPS5	-1.06395	3.50368e-10	ENSG00000083845
RPS19	-0.957375	3.50368e-10	ENSG00000105372
PAQR9	2.42961	3.87051e-10	ENSG00000188582
RPL11	-1.01828	3.88126e-10	ENSG00000142676
SHC4	1.59987	4.45813e-10	ENSG00000185634
SCNN1A	-1.88993	4.64565e-10	ENSG00000111319
IGFLR1	-1.75352	4.91101e-10	ENSG00000126246
FAU	-0.974682	4.91101e-10	ENSG00000149806
HMGB2	-1.32719	4.91101e-10	ENSG00000164104
NPM1	-0.956454	5.07071e-10	ENSG00000181163
PABPC1	-0.921258	5.12987e-10	ENSG00000070756
PMM1	-0.851806	5.38922e-10	ENSG00000100417
SLC25A29	-1.32533	5.38922e-10	ENSG00000197119
RPL19	-0.967196	5.44087e-10	ENSG00000108298
RPS3	-0.966631	5.44087e-10	ENSG00000149273
RPS27	-1.11165	5.44087e-10	ENSG00000177954
PHB2	-0.735385	5.44087e-10	ENSG00000215021
THBS3	1.57689	6.35915e-10	ENSG00000169231
KIF13B	1.19495	6.90763e-10	ENSG00000197892
LCN2	-2.50211	8.07871e-10	ENSG00000148346
NUPR1	-1.03266	8.37071e-10	ENSG00000176046
SYT13	2.32429	8.64334e-10	ENSG00000019505
RPL22	-0.91611	8.64334e-10	ENSG00000116251
RPL12	-0.950969	8.67927e-10	ENSG00000197958
ACLY	1.01985	8.68854e-10	ENSG00000131473
RPS18	-1.07311	9.88198e-10	ENSG00000096150
LGR4	0.974396	9.92128e-10	ENSG00000205213
LRRTM2	2.04411	1.01048e-09	ENSG00000146006
RPS18	-1.07134	1.01048e-09	ENSG00000223367
RPS18	-1.07134	1.01048e-09	ENSG00000226225
RPS18	-1.07134	1.01048e-09	ENSG00000231500
RPS18	-1.07134	1.01048e-09	ENSG00000235650
KIT	-2.41732	1.15589e-09	ENSG00000157404
ECSIT	-0.960261	1.15829e-09	ENSG00000130159
HSD17B14	-1.64639	1.28942e-09	ENSG00000087076
EIF3G	-0.797136	1.28942e-09	ENSG00000130811
EIF3F	-0.756882	1.28942e-09	ENSG00000175390
EIF3F	-0.756882	1.28942e-09	ENSG00000280606
PABPC4	-0.856616	1.39096e-09	ENSG00000090621
ADM	-1.99723	1.53349e-09	ENSG00000148926
RP11-3P17.3	-0.948743	1.58526e-09	ENSG00000234851
SLC6A16	-1.90524	1.59741e-09	ENSG00000063127
DUSP14	1.41286	1.6455e-09	ENSG00000275932
LOXL3	1.7064	1.65767e-09	ENSG00000115318
GDF5	1.73292	1.65767e-09	ENSG00000125965
CCPG1	0.947852	1.65767e-09	ENSG00000260916
RPS17L	-0.970904	1.65767e-09	ENSG00000278229
RPL41	-0.931331	1.7313e-09	ENSG00000229117
RPL38	-1.00702	1.85638e-09	ENSG00000172809
GPR162	-1.53936	2.14169e-09	ENSG00000250510
RPS15	-0.961535	2.18609e-09	ENSG00000115268
LECT1	2.2495	2.29071e-09	ENSG00000136110
HIST1H1C	-1.68067	2.2926e-09	ENSG00000187837
PRSS54	2.16476	2.5223e-09	ENSG00000103023
HPN	-2.0152	2.77332e-09	ENSG00000105707
RPL24	-1.04773	2.85455e-09	ENSG00000114391
RPUSD4	-0.793182	3.13404e-09	ENSG00000165526
FMOD	1.40316	3.21988e-09	ENSG00000122176
CLTA	-0.709222	3.23177e-09	ENSG00000122705
CNN2	-1.50665	3.30634e-09	ENSG00000064666
DCXR	-1.57542	3.38745e-09	ENSG00000169738
LPAR4	1.46257	3.74666e-09	ENSG00000147145
COL11A1	1.63111	3.7873e-09	ENSG00000060718
GNB2L1	-0.701984	3.98943e-09	ENSG00000204628
PALMD	0.971765	4.27532e-09	ENSG00000099260
SYT12	1.85511	4.27532e-09	ENSG00000173227
CEBPB	-1.1051	4.77043e-09	ENSG00000172216
SNRPD2	-0.805924	5.59685e-09	ENSG00000125743
DLX6	1.0062	5.7524e-09	ENSG00000006377
CDKN1A	-1.81581	5.7524e-09	ENSG00000124762
RPL18	-1.03137	5.7831e-09	ENSG00000063177
RPS15A	-0.957188	6.06103e-09	ENSG00000134419
RPL37A	-1.01008	6.37958e-09	ENSG00000197756
IMPAD1	0.761559	6.39368e-09	ENSG00000104331
THG1L	-0.921578	6.851e-09	ENSG00000113272
LRP2BP	1.11266	6.91094e-09	ENSG00000109771
TNFRSF6B	-2.26226	7.19697e-09	ENSG00000243509
TUSC3	0.947435	8.01623e-09	ENSG00000104723
ELF3	-2.05852	8.48853e-09	ENSG00000163435
MINPP1	0.894295	8.53934e-09	ENSG00000107789
PHTF2	0.911847	8.85062e-09	ENSG00000006576
RPL26	-0.981784	8.94262e-09	ENSG00000161970
GBP2	-1.36577	1.01711e-08	ENSG00000162645
IGF2	1.72239	1.10675e-08	ENSG00000167244
COX4I1	-0.685695	1.11612e-08	ENSG00000131143
COLGALT2	1.3631	1.14156e-08	ENSG00000198756
RPS28P7	-0.982542	1.14318e-08	ENSG00000227097
KBTBD7	1.16919	1.18476e-08	ENSG00000120696
INHBA	1.409	1.18476e-08	ENSG00000122641
RPS11	-0.941763	1.18476e-08	ENSG00000142534
RSL1D1	-0.919349	1.18476e-08	ENSG00000171490
CYP27C1	1.24948	1.27307e-08	ENSG00000186684
EIF3I	-0.698028	1.3098e-08	ENSG00000084623
EIF3K	-0.672795	1.31352e-08	ENSG00000178982
ACKR2	1.67289	1.396e-08	ENSG00000144648
EEF1G	-0.746972	1.40323e-08	ENSG00000254772
MYBPH	-2.06367	1.5186e-08	ENSG00000133055
CDCA7L	-1.33809	1.5186e-08	ENSG00000164649
ENOX1	1.5172	1.66377e-08	ENSG00000120658
TRAPPC2L	-0.847656	1.66377e-08	ENSG00000167515
ANO1	1.28397	1.79847e-08	ENSG00000131620
SAT2	-0.860526	1.79915e-08	ENSG00000141504
GREM1	2.41106	1.79915e-08	ENSG00000276886
RPL10A	-0.873122	1.81849e-08	ENSG00000198755
TBC1D2B	-0.864673	1.90818e-08	ENSG00000167202
SYT8	2.00419	1.91128e-08	ENSG00000149043
TMEM92	-2.77735	1.91128e-08	ENSG00000167105
GPR180	0.826004	1.93043e-08	ENSG00000152749
G0S2	-1.77378	1.9344e-08	ENSG00000123689
RPLP1	-0.926959	1.9344e-08	ENSG00000137818
SYT4	2.61044	1.96261e-08	ENSG00000132872
RPS20	-1.01999	1.97424e-08	ENSG00000008988
SLC7A8	-1.12221	1.98487e-08	ENSG00000092068
TOP1MT	-1.0008	1.98487e-08	ENSG00000184428
OGN	1.7592	2.01219e-08	ENSG00000106809
ADAMTS6	1.71235	2.01621e-08	ENSG00000049192
ICK	0.691165	2.09315e-08	ENSG00000112144
RARRES3	-1.41584	2.09315e-08	ENSG00000133321
PIM1	-1.64983	2.09753e-08	ENSG00000137193
MXRA5	1.87747	2.25106e-08	ENSG00000101825
MCM7	-0.786001	2.25106e-08	ENSG00000166508
RPS29	-0.952385	2.35549e-08	ENSG00000213741
JUP	-1.35317	2.66548e-08	ENSG00000173801
ITPKC	-1.02155	2.69553e-08	ENSG00000086544
PODXL2	1.58871	2.92687e-08	ENSG00000114631
RPS9	-1.0514	2.95781e-08	ENSG00000274005
RPS9	-1.0514	2.95781e-08	ENSG00000274626
RPS9	-1.0514	2.95781e-08	ENSG00000275323
RPS9	-1.0514	2.95781e-08	ENSG00000277079
RPS9	-1.0514	2.95781e-08	ENSG00000277359
RPS9	-1.0514	2.95781e-08	ENSG00000278081
RPL15	-0.791534	2.98937e-08	ENSG00000174748
PCSK1	-2.32045	3.03669e-08	ENSG00000175426
CYTH2	-0.637642	3.04745e-08	ENSG00000105443
PRKCZ	1.09699	3.07115e-08	ENSG00000067606
FRMPD4	1.48229	3.10052e-08	ENSG00000169933
FZD7	1.03131	3.13166e-08	ENSG00000155760
CDON	1.4509	3.22761e-08	ENSG00000064309
GABRA4	1.37548	3.22761e-08	ENSG00000109158
SQSTM1	-0.689225	3.47589e-08	ENSG00000161011
FBL	-0.919967	3.50209e-08	ENSG00000105202
FBL	-0.919967	3.50209e-08	ENSG00000280548
NFATC2	1.77439	3.70366e-08	ENSG00000101096
MKNK2	-1.10457	3.76198e-08	ENSG00000099875
BLVRB	-0.883829	3.81897e-08	ENSG00000090013
FHL1	0.960262	3.87263e-08	ENSG00000022267
KCNK15	-1.59997	3.87263e-08	ENSG00000124249
DUSP14	1.56238	3.87589e-08	ENSG00000276023
SOX13	-1.52321	4.06813e-08	ENSG00000143842
RPS12	-0.963153	4.31243e-08	ENSG00000112306
TSTD2	0.599776	4.42709e-08	ENSG00000136925
SAMD4A	1.05957	4.43807e-08	ENSG00000020577
C14orf93	-0.886168	4.48126e-08	ENSG00000100802
FAM198A	1.63879	4.50622e-08	ENSG00000144649
GLS	0.910941	4.56235e-08	ENSG00000115419
RPS6	-0.925498	4.56235e-08	ENSG00000137154
EMILIN3	1.61661	4.56856e-08	ENSG00000183798
USH1C	2.27062	4.73058e-08	ENSG00000006611
IGBP1	-0.866325	4.73058e-08	ENSG00000089289
RPL8	-0.896668	4.76202e-08	ENSG00000161016
RPL10	-0.784969	5.04174e-08	ENSG00000147403
SAE1	-0.696562	5.49568e-08	ENSG00000142230
WISP3	1.15316	5.49935e-08	ENSG00000112761
C19orf43	-0.74398	5.49935e-08	ENSG00000123144
SULF2	0.98765	5.49935e-08	ENSG00000196562
KIAA1755	1.47505	5.95643e-08	ENSG00000149633
RPS7	-0.83143	6.03911e-08	ENSG00000171863
TOB1	-1.3951	6.18733e-08	ENSG00000141232
HMOX1	-1.9777	6.3326e-08	ENSG00000100292
TFRC	1.29319	6.41697e-08	ENSG00000072274
RGS6	2.48567	6.51434e-08	ENSG00000182732
NOG	1.67762	6.64434e-08	ENSG00000183691
ECM2	1.11551	6.8801e-08	ENSG00000106823
GRIN2A	2.00123	6.8801e-08	ENSG00000183454
NOA1	-0.623187	6.9556e-08	ENSG00000084092
LCTL	1.82611	7.14178e-08	ENSG00000188501
TMEM63C	2.70453	7.48691e-08	ENSG00000165548
TMOD1	-1.74865	7.82813e-08	ENSG00000136842
KIAA1549	1.42708	7.88816e-08	ENSG00000122778
RPL17	-0.879884	8.13663e-08	ENSG00000265681
NRK	1.08912	8.51568e-08	ENSG00000123572
LDLRAD4	0.960494	8.72545e-08	ENSG00000168675
MLLT11	0.800053	9.3048e-08	ENSG00000213190
GRIA2	1.96926	9.42182e-08	ENSG00000120251
LINC00888	0.982072	9.42182e-08	ENSG00000240024
SCUBE3	2.13363	9.62895e-08	ENSG00000146197
PLEKHF1	-1.01337	9.96938e-08	ENSG00000166289
COL2A1	2.38948	1.01331e-07	ENSG00000139219
RPL35A	-0.941544	1.05691e-07	ENSG00000182899
WDR86	-2.32517	1.05767e-07	ENSG00000187260
RIMS1	1.80798	1.06957e-07	ENSG00000079841
EFR3B	1.57807	1.06957e-07	ENSG00000084710
CHAC2	-1.7389	1.19052e-07	ENSG00000143942
GLTSCR2	-0.947799	1.23417e-07	ENSG00000105373
AIP	-0.61148	1.23417e-07	ENSG00000110711
CCL20	-2.4983	1.23417e-07	ENSG00000115009
CILP2	1.65508	1.23417e-07	ENSG00000160161
STK32C	-1.09568	1.23417e-07	ENSG00000165752
SLC43A2	-1.47868	1.26501e-07	ENSG00000278550
BTF3	-0.688888	1.26527e-07	ENSG00000145741
PFKP	1.07363	1.36937e-07	ENSG00000067057
TPT1	-0.912282	1.37927e-07	ENSG00000133112
ACTG1	-0.920937	1.43428e-07	ENSG00000184009
NPC2	-0.808336	1.45592e-07	ENSG00000119655
RAMP3	1.71201	1.45775e-07	ENSG00000122679
ABTB1	-0.862901	1.50252e-07	ENSG00000114626
GYPC	-1.03472	1.50252e-07	ENSG00000136732
LPHN1	1.32934	1.52589e-07	ENSG00000072071
FLOT2	-0.791309	1.53912e-07	ENSG00000132589
MMP3	-1.97939	1.66063e-07	ENSG00000149968
RPL23	-0.822977	1.67114e-07	ENSG00000125691
IRS2	-1.06062	1.67114e-07	ENSG00000185950
ZFP36	-1.48425	1.7616e-07	ENSG00000128016
RPL13	-1.03669	1.76887e-07	ENSG00000167526
FUT11	0.701948	1.78061e-07	ENSG00000196968
RPL30	-0.917396	1.79566e-07	ENSG00000156482
SYF2	-0.746137	1.82827e-07	ENSG00000117614
SPTSSB	2.04637	1.85086e-07	ENSG00000196542
COL9A1	2.09239	1.87659e-07	ENSG00000112280
ACADL	-1.80657	1.87659e-07	ENSG00000115361
FUT4	0.843871	1.87659e-07	ENSG00000196371
RPS9	-0.97523	1.88277e-07	ENSG00000274950
PIM3	-1.28969	1.91604e-07	ENSG00000198355
MAFF	-1.37051	1.98027e-07	ENSG00000185022
RPL36A	-0.985551	1.99712e-07	ENSG00000241343
BRI3	-0.755324	2.05389e-07	ENSG00000164713
OXA1L	-0.665317	2.06301e-07	ENSG00000155463
BTG2	-1.61856	2.06963e-07	ENSG00000159388
ATP2B4	0.751488	2.09133e-07	ENSG00000058668
CSN1S1	2.71129	2.13804e-07	ENSG00000126545
RPS28	-1.05781	2.28518e-07	ENSG00000233927
FAM180B	1.81019	2.31338e-07	ENSG00000196666
ZSWIM3	1.03726	2.33484e-07	ENSG00000132801
ZC3H12A	-1.33117	2.33484e-07	ENSG00000163874
NFKBIA	-1.03355	2.36885e-07	ENSG00000100906
MPST	-1.03315	2.36885e-07	ENSG00000128309
EIF4B	-0.883349	2.38473e-07	ENSG00000063046
TMEM181	0.705698	2.45429e-07	ENSG00000146433
ODC1	-0.936258	2.81265e-07	ENSG00000115758
C3	-1.96446	2.81265e-07	ENSG00000125730
SLC2A3	-1.22776	2.83084e-07	ENSG00000059804
ENC1	1.44371	2.85259e-07	ENSG00000171617
BAALC	1.79163	2.88929e-07	ENSG00000164929
EXTL2	0.968935	3.0479e-07	ENSG00000162694
IL6	-2.70799	3.07509e-07	ENSG00000136244
RFC2	-0.701784	3.46317e-07	ENSG00000049541
MAOA	-1.9736	3.50713e-07	ENSG00000189221
ZNF449	0.787543	3.67335e-07	ENSG00000173275
GPX4	-0.802441	3.84153e-07	ENSG00000167468
ATP5G2	-0.682229	4.27081e-07	ENSG00000135390
PFDN5	-0.770038	4.3232e-07	ENSG00000123349
MT1G	-2.11353	4.43427e-07	ENSG00000125144
CITED2	-1.19692	4.43427e-07	ENSG00000164442
COX7A2L	-0.690547	4.48036e-07	ENSG00000115944
CASP4	-1.46689	4.48036e-07	ENSG00000196954
GRIN2C	1.76993	4.48078e-07	ENSG00000161509
EFHC2	1.19513	4.56139e-07	ENSG00000183690
TULP4	1.08545	5.01786e-07	ENSG00000130338
ZDHHC12	-0.902636	5.10419e-07	ENSG00000160446
RCN2	0.848452	5.19711e-07	ENSG00000117906
AHCY	-0.603542	5.28786e-07	ENSG00000101444
SOD2	-1.57224	5.50016e-07	ENSG00000112096
EEF1B2	-0.894732	5.56868e-07	ENSG00000114942
USP6NL	0.932026	5.6717e-07	ENSG00000148429
H1FX	-0.939029	5.81338e-07	ENSG00000184897
RPL27	-0.768665	5.89607e-07	ENSG00000131469
RPL5	-0.827899	6.02037e-07	ENSG00000122406
CTSL	-0.631385	6.29622e-07	ENSG00000135047
SLC35D1	0.801867	6.31163e-07	ENSG00000116704
DOCK7	0.609443	6.421e-07	ENSG00000116641
RPS25	-0.944494	6.421e-07	ENSG00000118181
UBALD2	-0.992766	6.421e-07	ENSG00000185262
RPS25	-0.944494	6.421e-07	ENSG00000280831
IMPA2	-1.13768	6.4455e-07	ENSG00000141401
SF3A2	-0.637303	6.59859e-07	ENSG00000104897
PGLS	-0.68206	6.79657e-07	ENSG00000130313
ACPP	-2.36771	6.89182e-07	ENSG00000014257
WDR13	-0.714859	6.91356e-07	ENSG00000101940
RPS13	-0.901461	7.00103e-07	ENSG00000110700
MAP6D1	1.36459	7.22282e-07	ENSG00000180834
GAB2	-1.2066	7.37303e-07	ENSG00000033327
ABHD14B	-0.831961	7.48978e-07	ENSG00000114779
IZUMO4	-1.62437	7.75959e-07	ENSG00000099840
EIF3M	-0.763921	7.75959e-07	ENSG00000149100
HMGB3P10	1.99932	7.85253e-07	ENSG00000223656
RANBP6	0.717734	7.91151e-07	ENSG00000137040
GPR3	-1.82975	7.94016e-07	ENSG00000181773
GRIA3	1.32735	8.3506e-07	ENSG00000125675
NET1	-1.00963	8.39517e-07	ENSG00000173848
SUN2	-0.934605	8.55176e-07	ENSG00000100242
RPL21	-0.850182	8.82455e-07	ENSG00000122026
IPPK	0.877754	8.83925e-07	ENSG00000127080
PHC2	-1.00352	8.83925e-07	ENSG00000134686
BBS12	0.792194	8.83925e-07	ENSG00000181004
RPL31	-0.900275	9.06652e-07	ENSG00000071082
FAM43B	1.39437	9.56219e-07	ENSG00000183114
MDK	-1.36706	9.74154e-07	ENSG00000110492
FBXO32	-1.13315	9.9831e-07	ENSG00000156804
WBSCR27	-1.5184	9.9831e-07	ENSG00000165171
PLEKHA1	0.966736	1.03201e-06	ENSG00000107679
GAS1	1.17782	1.06325e-06	ENSG00000180447
ST3GAL5	-1.25899	1.10737e-06	ENSG00000115525
EIF4EBP2	-0.648798	1.10737e-06	ENSG00000148730
SLC35G2	0.885365	1.10737e-06	ENSG00000168917
GREM1	2.22827	1.16315e-06	ENSG00000166923
ISM1	0.967882	1.22391e-06	ENSG00000101230
NIM1K	1.09986	1.23454e-06	ENSG00000177453
UXT	-0.754489	1.25835e-06	ENSG00000126756
ZNF30	1.10172	1.27951e-06	ENSG00000168661
NSA2	-0.861639	1.28191e-06	ENSG00000164346
RPL36AL	-0.995105	1.28191e-06	ENSG00000165502
SCRG1	1.36898	1.33781e-06	ENSG00000164106
CPNE4	2.64696	1.37771e-06	ENSG00000196353
HSD11B1	-1.69863	1.38525e-06	ENSG00000117594
PLIN5	-2.08027	1.40092e-06	ENSG00000214456
TMEM97	-0.940253	1.41886e-06	ENSG00000109084
MTHFD2	-1.06006	1.43983e-06	ENSG00000065911
N4BP2L1	-0.925654	1.47276e-06	ENSG00000139597
NSMCE2	-0.619266	1.52186e-06	ENSG00000156831
TBC1D10A	-0.598355	1.53469e-06	ENSG00000099992
CDH19	1.27979	1.60226e-06	ENSG00000071991
DTNBP1	-0.795128	1.62188e-06	ENSG00000047579
CHI3L1	-1.50517	1.62223e-06	ENSG00000133048
DNAJC10	0.687606	1.64009e-06	ENSG00000077232
MAP9	1.19149	1.65191e-06	ENSG00000164114
COPG2	-0.66591	1.65512e-06	ENSG00000158623
RMND1	-0.748932	1.67932e-06	ENSG00000155906
CHD1L	0.600438	1.70492e-06	ENSG00000131778
STRA13	-0.769919	1.70795e-06	ENSG00000169689
SLC29A1	0.922297	1.79245e-06	ENSG00000112759
RPS8	-0.701288	1.79827e-06	ENSG00000142937
RPS23	-0.820259	1.79827e-06	ENSG00000186468
INSIG2	0.785782	1.82916e-06	ENSG00000125629
MCOLN2	1.08472	1.82916e-06	ENSG00000153898
NACA	-0.735654	1.87504e-06	ENSG00000196531
DYSF	1.37758	1.91271e-06	ENSG00000135636
FOSL1	-1.86723	1.91271e-06	ENSG00000175592
RPLP2	-0.908145	1.92314e-06	ENSG00000177600
PQBP1	-0.627463	1.94625e-06	ENSG00000102103
ALKBH7	-0.850182	1.94625e-06	ENSG00000125652
IQCJ-SCHIP1	0.922532	1.94625e-06	ENSG00000250588
RPS21	-0.949938	2.03996e-06	ENSG00000171858
COL25A1	1.53855	2.06671e-06	ENSG00000188517
FGF11	1.32529	2.15034e-06	ENSG00000161958
EEF1A1	-0.634226	2.22523e-06	ENSG00000156508
CTB-50E14.5	-1.51324	2.26602e-06	ENSG00000269374
ITM2B	0.754449	2.27041e-06	ENSG00000136156
ALDH1L1	-1.49646	2.27714e-06	ENSG00000144908
GPR126	1.11069	2.29832e-06	ENSG00000112414
TOR1AIP2	0.615367	2.42234e-06	ENSG00000169905
SNRPA	-0.870427	2.4631e-06	ENSG00000077312
TIAM2	0.753147	2.48298e-06	ENSG00000146426
COX5B	-0.595882	2.48457e-06	ENSG00000135940
IQSEC1	0.866977	2.48566e-06	ENSG00000144711
RPS3A	-0.838765	2.48566e-06	ENSG00000145425
UBE2R2	-0.62861	2.48588e-06	ENSG00000107341
TUBB2B	1.2501	2.56968e-06	ENSG00000137285
DST	0.679693	2.63071e-06	ENSG00000151914
TNFSF12	-0.716514	2.63071e-06	ENSG00000239697
MXD3	-1.25411	2.73751e-06	ENSG00000213347
ZNF107	0.984912	2.73961e-06	ENSG00000196247
NAT2	1.09893	2.80773e-06	ENSG00000156006
ADAT1	0.727028	2.82429e-06	ENSG00000065457
FOXA3	1.31281	2.98067e-06	ENSG00000170608
OAT	0.636005	3.05055e-06	ENSG00000065154
AMIGO2	1.16681	3.07235e-06	ENSG00000139211
EPHA2	-1.28729	3.14322e-06	ENSG00000142627
CALCA	-2.45601	3.17932e-06	ENSG00000110680
MRPL41	-0.800019	3.24905e-06	ENSG00000182154
MGAT3	1.62811	3.3093e-06	ENSG00000128268
GNMT	-2.05484	3.32279e-06	ENSG00000124713
TGFA	1.13915	3.38493e-06	ENSG00000163235
ZDBF2	0.801629	3.59704e-06	ENSG00000204186
AHI1	0.830242	3.74118e-06	ENSG00000135541
GPM6B	-1.27772	3.7459e-06	ENSG00000046653
GTPBP6	-0.682628	3.86339e-06	ENSG00000178605
MYO3A	1.85721	3.87681e-06	ENSG00000095777
CD40	-1.11314	4.0437e-06	ENSG00000101017
HDAC7	-1.1387	4.09712e-06	ENSG00000061273
EXTL1	1.55442	4.09712e-06	ENSG00000158008
GABARAP	-0.598884	4.09712e-06	ENSG00000170296
TMEM132E	2.07707	4.38125e-06	ENSG00000181291
RPL14	-0.810229	4.38125e-06	ENSG00000188846
TNNT3	1.70761	4.79067e-06	ENSG00000130595
MRPL53	-0.810572	4.81396e-06	ENSG00000204822
CSPG5	1.77687	5.13949e-06	ENSG00000114646
ARRDC2	-0.784009	5.2137e-06	ENSG00000105643
MED23	0.598927	5.22876e-06	ENSG00000112282
BEST1	-1.28368	5.28496e-06	ENSG00000167995
PITX1	-0.949516	5.30273e-06	ENSG00000069011
NICN1	0.765159	5.30499e-06	ENSG00000145029
ASS1	-0.953319	5.45565e-06	ENSG00000130707
ERMP1	1.02546	5.53127e-06	ENSG00000099219
IGFBP1	2.43938	5.53392e-06	ENSG00000146678
TAF10	-0.709457	5.60105e-06	ENSG00000166337
FBLN1	-1.18612	5.64806e-06	ENSG00000077942
C7orf50	-0.822724	5.64806e-06	ENSG00000146540
CCDC17	-1.38105	5.68308e-06	ENSG00000159588
TAC1	1.78998	5.6891e-06	ENSG00000006128
LYRM1	-0.696923	5.7956e-06	ENSG00000102897
TMEM30A	0.634531	5.84692e-06	ENSG00000112697
SKIL	0.859425	6.02796e-06	ENSG00000136603
TMEM120A	-0.73269	6.0348e-06	ENSG00000189077
SACM1L	0.627938	6.0348e-06	ENSG00000211456
HK1	0.627039	6.10594e-06	ENSG00000156515
TTC30B	0.777905	6.10594e-06	ENSG00000196659
LRRN2	1.33453	6.1584e-06	ENSG00000170382
ITFG1	0.648003	6.22739e-06	ENSG00000129636
PRKCA	0.703148	6.28107e-06	ENSG00000154229
ATRN	0.790328	6.30826e-06	ENSG00000088812
SSBP3	-0.839313	6.30826e-06	ENSG00000157216
IRF1	-1.40561	6.31057e-06	ENSG00000125347
CASC4	0.707942	6.31057e-06	ENSG00000166734
FOXO3	-0.750452	6.49544e-06	ENSG00000118689
ATP5S	-0.806161	6.60319e-06	ENSG00000125375
VPS51	-0.631812	6.65732e-06	ENSG00000149823
MPZL3	1.09281	6.74995e-06	ENSG00000160588
PRR13	-0.713865	6.92945e-06	ENSG00000205352
IARS	0.602175	6.94287e-06	ENSG00000196305
CHCHD5	-0.749462	7.08093e-06	ENSG00000125611
MYC	-1.24874	7.14908e-06	ENSG00000136997
TRAPPC13P1	2.38296	7.16475e-06	ENSG00000235447
PAIP2B	-1.18899	7.17231e-06	ENSG00000124374
TNFRSF1B	-1.68487	7.21045e-06	ENSG00000028137
MACROD1	-0.927096	7.27216e-06	ENSG00000133315
TF	1.72073	7.36795e-06	ENSG00000091513
FGGY	-1.00781	7.39582e-06	ENSG00000172456
NME1-NME2	-0.606151	7.42735e-06	ENSG00000243678
SULF1	1.4405	7.44338e-06	ENSG00000137573
CDK2AP2	-0.950799	7.70734e-06	ENSG00000167797
BMP6	1.34306	7.86756e-06	ENSG00000153162
TPD52	0.920951	7.87994e-06	ENSG00000076554
AMTN	2.30448	8.02521e-06	ENSG00000187689
SAMD4B	-0.612239	8.09041e-06	ENSG00000179134
SCG5	1.35619	8.19557e-06	ENSG00000166922
GPR64	1.11656	8.31207e-06	ENSG00000173698
RPL6	-0.642387	8.35988e-06	ENSG00000089009
DRC1	1.52477	8.59856e-06	ENSG00000157856
CRIP1	1.3187	8.68691e-06	ENSG00000213145
TMEM200B	-0.786177	8.82484e-06	ENSG00000253304
AGTR2	2.36996	8.85553e-06	ENSG00000180772
INAFM1	-0.76171	8.94713e-06	ENSG00000257704
GLI3	0.843183	8.95508e-06	ENSG00000106571
EPO	2.01359	8.95508e-06	ENSG00000130427
ANKH	0.824516	9.01826e-06	ENSG00000154122
NHLRC3	0.66363	9.29188e-06	ENSG00000188811
EEF2	-0.670463	9.49528e-06	ENSG00000167658
FIBIN	1.13719	9.49528e-06	ENSG00000176971
MIDN	-0.943916	9.62784e-06	ENSG00000167470
FRK	0.84232	9.62959e-06	ENSG00000111816
NIPAL4	-2.32188	9.62959e-06	ENSG00000172548
RPS9	-1.12454	9.74754e-06	ENSG00000278270
KIAA1467	1.05666	9.74877e-06	ENSG00000084444
DSEL	0.896317	9.7681e-06	ENSG00000171451
ADO	0.619445	9.7681e-06	ENSG00000181915
DSEL	0.896317	9.7681e-06	ENSG00000262102
SEMA3D	1.4109	9.92538e-06	ENSG00000153993
CHPF2	0.67002	9.99366e-06	ENSG00000033100
GALNT16	1.59466	1.00349e-05	ENSG00000100626
IRF2BP2	-0.869886	1.00602e-05	ENSG00000168264
ZMYM2	0.771443	1.01332e-05	ENSG00000121741
EDEM3	0.722474	1.0342e-05	ENSG00000116406
PID1	0.93247	1.04184e-05	ENSG00000153823
ADAMTS4	-2.0547	1.04184e-05	ENSG00000158859
RPS14	-0.807934	1.04184e-05	ENSG00000164587
STAMBPL1	0.964123	1.04524e-05	ENSG00000138134
SLC1A4	0.905124	1.04804e-05	ENSG00000115902
RPL39	-0.838981	1.07028e-05	ENSG00000198918
GPT2	0.945279	1.07897e-05	ENSG00000166123
SH2B2	-1.32909	1.08285e-05	ENSG00000160999
SNN	-0.681207	1.08285e-05	ENSG00000184602
ACSS1	-1.11437	1.08401e-05	ENSG00000154930
ADPRM	-0.702918	1.08401e-05	ENSG00000170222
MT-ND6	1.08522	1.08401e-05	ENSG00000198695
TNFSF15	1.85406	1.09296e-05	ENSG00000181634
SLITRK6	2.3971	1.12789e-05	ENSG00000184564
CLDN5	-1.98164	1.14342e-05	ENSG00000184113
TMEM18	-0.627271	1.15829e-05	ENSG00000151353
FOSL2	-0.91326	1.15979e-05	ENSG00000075426
P2RY6	1.32839	1.18582e-05	ENSG00000171631
MLIP	1.70789	1.20833e-05	ENSG00000146147
ATP5L	-0.710784	1.21668e-05	ENSG00000167283
FAM19A1	1.91501	1.21668e-05	ENSG00000183662
TGFBR1	0.81312	1.22032e-05	ENSG00000106799
FAM160B1	0.678503	1.22032e-05	ENSG00000151553
PLBD1	0.812716	1.2206e-05	ENSG00000121316
ATF3	-1.54117	1.2206e-05	ENSG00000162772
ETV7	-1.44281	1.23319e-05	ENSG00000010030
KLF10	-0.904208	1.28285e-05	ENSG00000155090
SLC16A10	1.30466	1.30143e-05	ENSG00000112394
CDK2AP1	0.74769	1.30213e-05	ENSG00000111328
RGS10	-0.92908	1.32965e-05	ENSG00000148908
ARID5B	-1.03362	1.35027e-05	ENSG00000150347
MYZAP	-1.32905	1.37971e-05	ENSG00000263155
RPL3	-0.663186	1.48679e-05	ENSG00000100316
NGEF	0.914024	1.51023e-05	ENSG00000066248
MAGED1	0.822328	1.51456e-05	ENSG00000179222
SMARCAD1	0.612352	1.53608e-05	ENSG00000163104
RTKN	0.718101	1.53911e-05	ENSG00000114993
B3GAT2	2.02195	1.58662e-05	ENSG00000112309
ITIH5	1.28404	1.59589e-05	ENSG00000123243
LMX1B	-1.55128	1.59762e-05	ENSG00000136944
ZNF680	0.809951	1.6031e-05	ENSG00000173041
WNT9A	1.36861	1.66728e-05	ENSG00000143816
HTRA1	1.37644	1.68327e-05	ENSG00000166033
STC1	-2.20817	1.74429e-05	ENSG00000159167
APOLD1	-1.07743	1.74609e-05	ENSG00000178878
CCNG2	-0.873113	1.74731e-05	ENSG00000138764
PCBD1	-0.86731	1.75822e-05	ENSG00000166228
RPL34	-0.860252	1.76021e-05	ENSG00000109475
MAD2L2	-0.644715	1.76686e-05	ENSG00000116670
AC011242.6	0.802497	1.76686e-05	ENSG00000223658
RPS9	-1.12557	1.7911e-05	ENSG00000170889
CYP3A5	-1.25808	1.80781e-05	ENSG00000106258
TMEM87B	0.772891	1.82835e-05	ENSG00000153214
HINT1	-0.699264	1.82835e-05	ENSG00000169567
MDFIC	-0.5969	1.86398e-05	ENSG00000135272
LETMD1	-0.713939	1.88558e-05	ENSG00000050426
SEZ6L	1.62191	1.88558e-05	ENSG00000100095
DUSP23	-0.805955	1.89038e-05	ENSG00000158716
MAPK11	-0.936172	1.9152e-05	ENSG00000185386
RPL7	-0.76219	1.9392e-05	ENSG00000147604
MXI1	-0.842849	1.979e-05	ENSG00000119950
ZNF277	-0.7734	1.98663e-05	ENSG00000198839
SSH3	-0.717549	2.00786e-05	ENSG00000172830
MSRB1	-0.841691	2.0323e-05	ENSG00000198736
FAM46A	0.741593	2.04664e-05	ENSG00000112773
CHAF1A	-1.03263	2.06881e-05	ENSG00000167670
RPS27A	-0.814089	2.10505e-05	ENSG00000143947
EHD3	0.964042	2.23766e-05	ENSG00000013016
RPS24	-0.682713	2.27312e-05	ENSG00000138326
LIG1	-0.877153	2.29495e-05	ENSG00000105486
PVRL4	1.92609	2.33823e-05	ENSG00000143217
DOK1	0.973599	2.34125e-05	ENSG00000115325
MGMT	-0.727232	2.34206e-05	ENSG00000170430
LUM	0.836216	2.36962e-05	ENSG00000139329
SEMA6D	0.911968	2.40972e-05	ENSG00000137872
ZNF524	-0.770408	2.41329e-05	ENSG00000171443
FZD8	0.910817	2.43808e-05	ENSG00000177283
MALL	0.799305	2.48129e-05	ENSG00000144063
ZNF835	1.59787	2.58974e-05	ENSG00000127903
FAT1	0.914683	2.63301e-05	ENSG00000083857
CCDC9	-0.614594	2.68648e-05	ENSG00000105321
IL15RA	-1.21883	2.68648e-05	ENSG00000134470
RSL24D1	-0.842283	2.70468e-05	ENSG00000137876
TKT	-0.606549	2.70468e-05	ENSG00000163931
NEFH	1.23794	2.74819e-05	ENSG00000100285
TIMP4	-1.06242	2.75954e-05	ENSG00000157150
MZT2B	-0.78055	2.8276e-05	ENSG00000152082
FGF2	0.712006	2.84863e-05	ENSG00000138685
INS-IGF2	1.61441	2.85733e-05	ENSG00000129965
TNNI2	1.95084	2.90272e-05	ENSG00000130598
RALGPS1	1.05532	2.91289e-05	ENSG00000136828
ANGPTL7	-1.75882	2.93053e-05	ENSG00000171819
CHD9	0.593022	2.93053e-05	ENSG00000177200
SAMD11	1.28588	2.93053e-05	ENSG00000187634
C12orf57	-0.723348	2.96189e-05	ENSG00000111678
HCAR1	1.15582	2.9893e-05	ENSG00000196917
P4HA2	0.887785	2.99235e-05	ENSG00000072682
PLA2G16	-1.04206	3.02115e-05	ENSG00000176485
NT5C	-0.63259	3.18064e-05	ENSG00000125458
ODAM	2.25849	3.20716e-05	ENSG00000109205
ALDH18A1	0.626971	3.22752e-05	ENSG00000059573
BACE2	-0.885205	3.22956e-05	ENSG00000182240
CCDC85A	1.08544	3.23009e-05	ENSG00000055813
SCN1B	-0.748485	3.25991e-05	ENSG00000105711
SMOC1	1.27265	3.28356e-05	ENSG00000198732
SLC35D2	-0.627019	3.2899e-05	ENSG00000130958
TMEM141	-0.594667	3.3001e-05	ENSG00000244187
GRAMD2	1.22628	3.31466e-05	ENSG00000175318
ADAMTSL4	-0.758321	3.32805e-05	ENSG00000143382
CYSLTR1	1.11917	3.42534e-05	ENSG00000173198
RPS17	-1.01738	3.42534e-05	ENSG00000182774
CSNK2A2	-0.637937	3.43525e-05	ENSG00000070770
CBX5	0.627654	3.46533e-05	ENSG00000094916
RPL4	-0.635017	3.5944e-05	ENSG00000174444
BTBD11	0.926966	3.67311e-05	ENSG00000151136
IFITM3	-0.731748	3.67691e-05	ENSG00000142089
UGGT2	0.70873	3.69257e-05	ENSG00000102595
CSDC2	-1.44499	3.70353e-05	ENSG00000172346
EFNA1	-0.911172	3.80804e-05	ENSG00000169242
CCNB1IP1	-0.957352	3.8311e-05	ENSG00000100814
SYS1	-0.612908	3.95682e-05	ENSG00000204070
ITIH6	1.15572	4.03331e-05	ENSG00000102313
RIPPLY2	1.56395	4.03331e-05	ENSG00000203877
RAPH1	0.746942	4.07612e-05	ENSG00000173166
CIZ1	-0.600258	4.1095e-05	ENSG00000148337
FAM126B	0.817195	4.1095e-05	ENSG00000155744
ARSJ	0.716004	4.1095e-05	ENSG00000180801
STX3	-0.833667	4.21597e-05	ENSG00000166900
CSMD2	1.17205	4.23725e-05	ENSG00000121904
ZNF273	0.92229	4.23725e-05	ENSG00000198039
C2CD4B	-2.42787	4.23725e-05	ENSG00000205502
TFPI	-1.1931	4.24271e-05	ENSG00000003436
SRCIN1	-1.6655	4.24676e-05	ENSG00000277363
H3F3B	-0.615792	4.26929e-05	ENSG00000132475
C17orf49	-0.676167	4.27668e-05	ENSG00000258315
MSTN	1.75298	4.29374e-05	ENSG00000138379
APRT	-0.585645	4.31651e-05	ENSG00000198931
MCM5	-0.825636	4.33807e-05	ENSG00000100297
ZNF33B	-1.06209	4.46863e-05	ENSG00000196693
ELL2	-0.951541	4.59864e-05	ENSG00000118985
NNMT	-0.86866	4.59864e-05	ENSG00000166741
PKM	0.599116	4.71279e-05	ENSG00000067225
LRP12	0.786836	4.79687e-05	ENSG00000147650
TNC	1.49108	4.82581e-05	ENSG00000041982
AGPAT2	-0.603264	4.82581e-05	ENSG00000169692
AGPAT4	0.655395	4.83341e-05	ENSG00000026652
TRIM65	0.618611	4.85779e-05	ENSG00000141569
ELOVL4	0.852586	4.89829e-05	ENSG00000118402
UROC1	1.36429	4.89829e-05	ENSG00000159650
AQPEP	1.25076	4.89829e-05	ENSG00000172901
GPR155	0.940151	5.22161e-05	ENSG00000163328
ATP10A	0.792591	5.23506e-05	ENSG00000206190
MRPS24	-0.588	5.24505e-05	ENSG00000062582
SYNGAP1	-0.918317	5.30942e-05	ENSG00000227460
PPP1R15A	-1.1122	5.5205e-05	ENSG00000087074
EVA1C	-0.871201	5.53975e-05	ENSG00000166979
ITPR2	0.693025	5.56563e-05	ENSG00000123104
EIF3H	-0.636797	5.57177e-05	ENSG00000147677
ITGB4	-1.3501	5.67706e-05	ENSG00000132470
RAB4A	-0.608711	5.68852e-05	ENSG00000168118
HS1BP3	-0.710953	5.70046e-05	ENSG00000118960
EEPD1	-1.01143	5.78892e-05	ENSG00000122547
PLEKHB1	1.33105	5.7959e-05	ENSG00000021300
CR1	-2.03167	5.7959e-05	ENSG00000203710
COL23A1	1.64406	5.82332e-05	ENSG00000050767
SH3BP5L	0.611087	5.82332e-05	ENSG00000175137
SHF	-0.619364	5.87482e-05	ENSG00000138606
SLC35B4	0.650233	5.89068e-05	ENSG00000205060
RPL23AP1	-1.60811	5.90719e-05	ENSG00000239257
RPL23AP1	-1.60811	5.90719e-05	ENSG00000239784
RPL23AP1	-1.60811	5.90719e-05	ENSG00000240845
RPL23AP1	-1.60811	5.90719e-05	ENSG00000241880
RPL23AP1	-1.60811	5.90719e-05	ENSG00000242039
ZNF2	0.715584	5.90719e-05	ENSG00000275111
UACA	-0.796946	5.98249e-05	ENSG00000137831
TM7SF3	0.638537	6.08536e-05	ENSG00000064115
KLF11	-0.879786	6.11927e-05	ENSG00000172059
RBM3	-0.792554	6.20126e-05	ENSG00000102317
P3H2	1.08929	6.32968e-05	ENSG00000090530
LY6D	1.90937	6.61373e-05	ENSG00000167656
HSF1	-0.601934	6.73796e-05	ENSG00000185122
HMGA1	-1.48976	6.75886e-05	ENSG00000137309
SHISA2	1.21412	6.94875e-05	ENSG00000180730
SMDT1	-0.82227	6.98274e-05	ENSG00000183172
SMDT1	-0.82227	6.98274e-05	ENSG00000272835
SMDT1	-0.82227	6.98274e-05	ENSG00000274112
FAM65B	-1.75315	7.02499e-05	ENSG00000111913
FXYD6	0.819096	7.11524e-05	ENSG00000137726
GUSB	0.631531	7.16381e-05	ENSG00000169919
CMTR2	0.702728	7.16381e-05	ENSG00000180917
PODNL1	0.786023	7.26959e-05	ENSG00000132000
SMIM3	-0.977353	7.40895e-05	ENSG00000256235
NPHS2	2.23065	7.45648e-05	ENSG00000116218
TSPAN6	0.906333	7.4607e-05	ENSG00000000003
MYLK4	0.978467	7.4607e-05	ENSG00000145949
KIAA1279	0.598354	7.4607e-05	ENSG00000198954
ERICH1	-0.809796	7.94731e-05	ENSG00000104714
RP11-641D5.1	-0.945143	7.94731e-05	ENSG00000213178
FPGS	-0.661637	7.98246e-05	ENSG00000136877
C1GALT1C1	0.694612	8.08967e-05	ENSG00000171155
LMNB1	-1.41088	8.23534e-05	ENSG00000113368
KCND3	-1.02389	8.24774e-05	ENSG00000171385
UPP1	-0.860634	8.24774e-05	ENSG00000183696
SCML4	1.93664	8.33261e-05	ENSG00000146285
GATA6	-1.61496	8.42283e-05	ENSG00000141448
TSC22D3	-1.03998	8.45703e-05	ENSG00000157514
HILS1	1.28298	8.45703e-05	ENSG00000188662
DOCK8	1.04088	8.54564e-05	ENSG00000107099
PPP3CA	0.594263	8.62099e-05	ENSG00000138814
LTB4R	-0.991825	8.71112e-05	ENSG00000213903
B4GALNT3	0.732705	8.78337e-05	ENSG00000139044
PIK3CD	-0.89933	8.86284e-05	ENSG00000171608
ENDOU	-1.42946	8.98778e-05	ENSG00000111405
CDC42EP1	-0.873238	8.98778e-05	ENSG00000128283
ARL6	0.702976	8.98978e-05	ENSG00000113966
P4HA1	0.741535	8.99713e-05	ENSG00000122884
RNASEH2A	-0.739115	9.08601e-05	ENSG00000104889
YDJC	-0.749236	9.09835e-05	ENSG00000161179
NFIL3	-1.05313	9.15097e-05	ENSG00000165030
PAPSS1	0.614988	9.31755e-05	ENSG00000138801
TRIM23	0.693696	9.32049e-05	ENSG00000113595
ERRFI1	-0.985739	9.36353e-05	ENSG00000116285
SCUBE2	1.40028	9.43594e-05	ENSG00000175356
GALNT9	-1.4699	9.44817e-05	ENSG00000182870
TRPV4	0.99849	9.47949e-05	ENSG00000111199
SGTA	-0.594879	9.50085e-05	ENSG00000104969
TMEM2	0.804339	9.50318e-05	ENSG00000135048
FAM195B	-0.756818	9.50318e-05	ENSG00000225663
SYTL4	-1.06351	9.51277e-05	ENSG00000102362
SCN2B	0.993864	9.73509e-05	ENSG00000149575
FAM19A4	2.00632	9.84028e-05	ENSG00000163377
GBP1	-1.18494	9.84068e-05	ENSG00000117228
TMEM45A	0.644824	9.97947e-05	ENSG00000181458
TSNARE1	-0.663077	9.99208e-05	ENSG00000171045
CCDC144CP	1.35664	0.000103231	ENSG00000154898
KCTD4	1.15043	0.000103883	ENSG00000180332
ATCAY	1.53643	0.000103968	ENSG00000167654
GALNT15	-1.26457	0.000105609	ENSG00000131386
DMBT1	1.78047	0.000110089	ENSG00000187908
TUBB2A	0.879953	0.000111065	ENSG00000137267
HIF3A	-1.63495	0.000112352	ENSG00000124440
PYGO1	0.685529	0.000112356	ENSG00000171016
UBASH3B	1.02098	0.000114933	ENSG00000154127
ADCK2	-0.721173	0.000117547	ENSG00000133597
CTD-2192J16.20	1.26414	0.000121215	ENSG00000269693
MLH3	0.63809	0.000121989	ENSG00000119684
RNF19A	-0.732124	0.000122228	ENSG00000034677
LCLAT1	0.652988	0.000124714	ENSG00000172954
IGFBP6	-0.981266	0.000124757	ENSG00000167779
AC141586.5	0.792793	0.000124896	ENSG00000215154
EIF1	-0.673155	0.000125361	ENSG00000173812
RAB37	-1.02759	0.000126223	ENSG00000172794
EIF4A1	-0.644419	0.000129042	ENSG00000161960
PNPLA2	-0.751237	0.000129914	ENSG00000177666
GBE1	0.839677	0.000130155	ENSG00000114480
GINS2	-1.11042	0.000130155	ENSG00000131153
KLF7	-1.04192	0.000131138	ENSG00000118263
GBGT1	-0.605518	0.000132249	ENSG00000148288
KIAA0513	0.677386	0.000132492	ENSG00000135709
UNC13D	-1.02546	0.00013385	ENSG00000092929
FCN1	-2.23452	0.00013464	ENSG00000085265
MYADM	0.836212	0.00013464	ENSG00000179820
ZNF365	0.791276	0.000135803	ENSG00000138311
SLC2A12	1.34662	0.000135803	ENSG00000146411
TMEM140	-0.810376	0.000135803	ENSG00000146859
HHIPL2	0.942107	0.000135963	ENSG00000143512
ARRDC3	-1.00108	0.000136691	ENSG00000113369
MMP16	1.51833	0.000136691	ENSG00000156103
THBS4	1.32871	0.000137116	ENSG00000113296
ECI1	-0.606259	0.000138719	ENSG00000167969
R3HDML	2.14552	0.000138753	ENSG00000101074
LIF	-1.83901	0.000140894	ENSG00000128342
COL9A2	1.19854	0.000141928	ENSG00000049089
MADCAM1	-1.53708	0.000143	ENSG00000099866
ALX4	1.48134	0.000148081	ENSG00000052850
EVX1	1.55158	0.000148902	ENSG00000106038
KLHL15	0.589424	0.000149354	ENSG00000174010
RFC5	-0.630751	0.000150061	ENSG00000111445
DDX26B	0.659386	0.000150358	ENSG00000165359
NFAT5	0.655208	0.000151058	ENSG00000102908
POGLUT1	0.604425	0.000154661	ENSG00000163389
CERS1	1.35224	0.000154661	ENSG00000223802
OAF	0.72579	0.000156037	ENSG00000184232
DDT	-0.671885	0.000159213	ENSG00000099977
TMEM171	-1.31674	0.000159381	ENSG00000157111
GJA3	1.68372	0.000162365	ENSG00000121743
SLC35B2	0.629281	0.000162547	ENSG00000157593
RHOB	-0.869766	0.000163346	ENSG00000143878
PMEL	1.00183	0.000163909	ENSG00000185664
DSN1	-0.674609	0.000165922	ENSG00000149636
PNMAL1	1.3815	0.000165922	ENSG00000182013
IBTK	0.618219	0.000168438	ENSG00000005700
CDKN1B	-0.595039	0.000170204	ENSG00000111276
YJEFN3	1.11802	0.000170657	ENSG00000250067
GPR19	1.08872	0.000171966	ENSG00000183150
MYOT	1.39046	0.000176517	ENSG00000120729
SFT2D2	0.610234	0.00017732	ENSG00000213064
HHAT	0.962117	0.000179125	ENSG00000054392
HHAT	0.962117	0.000179125	ENSG00000280680
ARID5A	-0.805374	0.000184358	ENSG00000196843
INPP5F	0.640307	0.000184576	ENSG00000198825
NUDT18	-0.633729	0.000185253	ENSG00000275074
CRY1	0.627707	0.000186074	ENSG00000008405
EZH1	-0.592082	0.000189577	ENSG00000108799
FAM57A	0.669342	0.000190961	ENSG00000167695
AATF	-1.02226	0.000190961	ENSG00000275700
FNBP1	-0.6666	0.000191215	ENSG00000187239
VWA1	0.770052	0.000191419	ENSG00000179403
PTP4A3	-1.11554	0.000192009	ENSG00000184489
DPF1	1.58932	0.000192327	ENSG00000011332
PGBD1	0.59412	0.000192699	ENSG00000137338
PAPSS2	0.849359	0.000193306	ENSG00000198682
TMPRSS4	-1.58128	0.000196771	ENSG00000137648
ITM2A	1.18601	0.000197559	ENSG00000078596
MAMDC2	1.46027	0.00019862	ENSG00000165072
C10orf105	1.22114	0.0002004	ENSG00000214688
COL5A2	1.09141	0.000203669	ENSG00000204262
SLC16A3	0.690635	0.000205715	ENSG00000141526
FOXL1	-0.929045	0.000210313	ENSG00000176678
KCNG2	1.51995	0.000210616	ENSG00000178342
FOXN3	-0.671449	0.000212237	ENSG00000053254
NOX4	-1.46314	0.000212237	ENSG00000086991
C11orf24	0.607283	0.000213189	ENSG00000171067
CAP2	1.31615	0.000217964	ENSG00000112186
CCND3	-0.702531	0.00022027	ENSG00000112576
KIF1A	1.44964	0.000227151	ENSG00000130294
PPFIA4	0.915044	0.00022768	ENSG00000143847
TBKBP1	-0.612608	0.000232053	ENSG00000198933
KCNA2	2.0211	0.000233764	ENSG00000177301
XKR8	0.673308	0.000234082	ENSG00000158156
SPSB3	-0.588125	0.000235288	ENSG00000162032
DLGAP3	-1.32489	0.000236127	ENSG00000116544
PSTPIP1	0.944773	0.000236736	ENSG00000140368
GDF10	1.21018	0.000237016	ENSG00000266524
CYP51A1	0.637168	0.000239669	ENSG00000001630
EPYC	1.29445	0.000239884	ENSG00000083782
RCSD1	0.970714	0.000242326	ENSG00000198771
KCNS1	1.87361	0.000242524	ENSG00000124134
CFI	1.20964	0.000243704	ENSG00000205403
CCNI	-0.694387	0.000243935	ENSG00000118816
NHEJ1	-0.79956	0.000243935	ENSG00000187736
SLC14A2	-1.43321	0.000244022	ENSG00000132874
CHAD	1.16569	0.00024682	ENSG00000136457
EBP	-0.721586	0.000247491	ENSG00000147155
EDIL3	0.780366	0.000251095	ENSG00000164176
RFX3	0.907385	0.000255048	ENSG00000080298
CREB3L1	-1.21157	0.000255204	ENSG00000157613
WDR5B	0.736882	0.000255638	ENSG00000196981
ATP1B1	0.831378	0.000256698	ENSG00000143153
USP32P3	1.17534	0.000256698	ENSG00000189423
CCDC180	0.693306	0.000256698	ENSG00000197816
PSMB8	-0.960924	0.000261802	ENSG00000204264
PSMB8	-0.960924	0.000261802	ENSG00000206298
PSMB8	-0.960924	0.000261802	ENSG00000226201
PSMB8	-0.960924	0.000261802	ENSG00000230669
PSMB8	-0.960924	0.000261802	ENSG00000236443
DSE	-0.780453	0.000264403	ENSG00000111817
FANCE	-0.815307	0.000264403	ENSG00000112039
RSG1	-0.99523	0.000264403	ENSG00000132881
PARS2	0.709308	0.000264403	ENSG00000162396
ESPNP	1.36588	0.000264403	ENSG00000268869
DDT	-0.658235	0.000264403	ENSG00000275003
FAIM3	-1.17019	0.000264801	ENSG00000162894
PHLDB3	-0.780795	0.000264801	ENSG00000176531
SLC22A11	1.46423	0.000267106	ENSG00000168065
NRCAM	1.35069	0.000268057	ENSG00000091129
CD14	-0.986143	0.000271578	ENSG00000170458
PCSK2	1.74156	0.000275143	ENSG00000125851
DNAH12	1.62545	0.000279371	ENSG00000174844
ANGPTL6	0.782399	0.000281862	ENSG00000130812
SLC43A1	-0.66991	0.000281862	ENSG00000149150
ZNF580	-0.805941	0.000283966	ENSG00000213015
DDIT4L	0.80413	0.000288043	ENSG00000145358
SLC30A7	0.61385	0.000296914	ENSG00000162695
GFER	-0.613274	0.000298972	ENSG00000127554
AACS	0.622884	0.000300079	ENSG00000081760
COL15A1	1.23631	0.000300752	ENSG00000204291
SLC26A2	1.01965	0.000303353	ENSG00000155850
RANBP3L	1.07766	0.000303353	ENSG00000164188
SPHK1	-1.42848	0.000303353	ENSG00000176170
SPARC	1.2284	0.000303675	ENSG00000113140
ATP6V1B2	-0.629743	0.000304623	ENSG00000147416
CCNG1	-0.738659	0.000308103	ENSG00000113328
MBOAT1	0.830173	0.000308423	ENSG00000172197
XYLT1	0.91729	0.000311168	ENSG00000103489
BCAT2	-0.635473	0.000311168	ENSG00000105552
C1orf74	0.774499	0.000311168	ENSG00000162757
TNFAIP2	-0.984653	0.000311168	ENSG00000185215
CREB3L2	0.641175	0.000312905	ENSG00000182158
PAM	0.674013	0.000315575	ENSG00000145730
P3H3	0.713604	0.000319829	ENSG00000110811
MYOC	-1.60551	0.000321102	ENSG00000034971
CCR10	-1.12884	0.000321102	ENSG00000184451
THRA	-0.594471	0.000321915	ENSG00000126351
DZIP1L	0.686011	0.000324198	ENSG00000158163
ITPRIP	-1.02347	0.000329544	ENSG00000148841
AK4	0.624671	0.000329544	ENSG00000162433
MPND	-0.618563	0.000329996	ENSG00000008382
ZNF771	-0.704804	0.000331436	ENSG00000179965
PNRC1	-0.793709	0.000332359	ENSG00000146278
FAM3B	-1.55899	0.000332359	ENSG00000183844
RAP1GAP	1.03833	0.000332368	ENSG00000076864
MDFI	0.925484	0.000333228	ENSG00000112559
CD109	0.796827	0.000334431	ENSG00000156535
CGREF1	0.807377	0.000338538	ENSG00000138028
PSMB9	-1.29652	0.000338586	ENSG00000243067
SNAPC2	-0.595899	0.000339516	ENSG00000104976
TTC9	1.43656	0.000341466	ENSG00000133985
NYNRIN	0.851379	0.000342558	ENSG00000205978
SH2D5	-2.13902	0.000343498	ENSG00000189410
MYO7A	-1.23679	0.000345284	ENSG00000137474
LDLRAD2	1.03903	0.000350611	ENSG00000187942
SDC4	-0.830607	0.000357402	ENSG00000124145
PSMB9	-1.29184	0.000358112	ENSG00000240065
GPR125	0.664885	0.000360794	ENSG00000152990
ABHD4	-0.643484	0.00036113	ENSG00000100439
PSMB9	-1.29875	0.000361497	ENSG00000240118
PPIC	0.920457	0.000363447	ENSG00000168938
SLC39A8	0.719272	0.000380481	ENSG00000138821
LRRC8D	0.697348	0.000389138	ENSG00000171492
AKAP12	-1.09359	0.000391864	ENSG00000131016
PRKD1	0.77538	0.000393745	ENSG00000184304
ZBTB3	0.862704	0.000393745	ENSG00000185670
BEX2	-1.22144	0.00039425	ENSG00000133134
CLCN5	0.91033	0.000397535	ENSG00000171365
SSPN	0.720692	0.000397778	ENSG00000123096
LRP4	0.824054	0.000408076	ENSG00000134569
PSMB9	-1.2872	0.00041042	ENSG00000239836
PSMB9	-1.2872	0.00041042	ENSG00000243594
NBEA	0.699515	0.00041826	ENSG00000172915
PINX1	-0.622363	0.000421857	ENSG00000254093
ALDH4A1	-1.10687	0.000425456	ENSG00000159423
GALNT18	0.769367	0.000426221	ENSG00000110328
CD24	1.69635	0.00042774	ENSG00000272398
BMS1P1	0.862803	0.000428865	ENSG00000204177
SRCIN1	-1.83795	0.000433175	ENSG00000273608
RCAN1	1.0786	0.000433678	ENSG00000159200
ANGPTL5	0.933579	0.000436876	ENSG00000187151
TAP2	-1.55203	0.000442105	ENSG00000204267
VSTM4	0.602367	0.000442535	ENSG00000165633
ABCA6	-1.11469	0.000444748	ENSG00000154262
RP11-112N13.1	0.82499	0.000446069	ENSG00000238208
IFITM2	-0.899602	0.000449756	ENSG00000185201
PEG3	0.999045	0.000449776	ENSG00000198300
ASTE1	0.679618	0.000455697	ENSG00000034533
ADAMTS3	1.09313	0.000459904	ENSG00000156140
FBXL15	-0.621389	0.000460167	ENSG00000107872
FGF22	-1.66683	0.00046034	ENSG00000070388
DBP	1.13938	0.000462672	ENSG00000105516
ASB13	-0.673964	0.000464875	ENSG00000196372
AC010970.2	2.03582	0.000466044	ENSG00000225840
F5	1.21936	0.000467923	ENSG00000198734
LDHD	-0.933233	0.000468474	ENSG00000166816
FBLN7	1.10936	0.000472421	ENSG00000144152
ZBTB18	0.656189	0.00048455	ENSG00000179456
ATP6V0A4	1.7342	0.000491493	ENSG00000105929
IL31RA	1.46207	0.000492764	ENSG00000164509
PLIN4	-1.73282	0.000495788	ENSG00000167676
MT1H	-1.65301	0.000495788	ENSG00000205358
ING1	-0.786934	0.000504468	ENSG00000153487
GCNT1	0.927742	0.000505981	ENSG00000187210
VIM	-0.632007	0.000506869	ENSG00000026025
NR1D2	0.853241	0.000509102	ENSG00000174738
MAP3K8	-0.776404	0.000513259	ENSG00000107968
HRASLS5	-1.14533	0.000519029	ENSG00000168004
RHOJ	0.697233	0.000522115	ENSG00000126785
ZIC1	-1.23122	0.00052604	ENSG00000152977
UGP2	0.680577	0.000527328	ENSG00000169764
SOX5	0.664045	0.000532381	ENSG00000134532
ZNF14	0.730435	0.000534321	ENSG00000105708
ZFP3	0.629863	0.000537071	ENSG00000180787
S100A4	1.14787	0.00053751	ENSG00000196154
CA5B	0.777813	0.000538976	ENSG00000169239
CORO6	-0.999717	0.000539462	ENSG00000167549
RAPGEF4	1.12679	0.0005403	ENSG00000091428
CRHR1	1.42031	0.000541751	ENSG00000120088
BCR	-0.821229	0.000543044	ENSG00000186716
PDIA5	0.652979	0.000543778	ENSG00000065485
TSPAN11	1.19312	0.000546018	ENSG00000110900
RP5-1052I5.2	0.818732	0.000546018	ENSG00000267561
MUM1L1	1.06703	0.000547151	ENSG00000157502
PRC1	-0.900478	0.000547151	ENSG00000198901
CCDC7	0.907055	0.000548662	ENSG00000150076
TNFRSF8	1.51923	0.000549454	ENSG00000120949
STEAP2	0.691584	0.000552298	ENSG00000157214
FAR2P2	0.857433	0.000553759	ENSG00000178162
ZNF711	0.925604	0.000557886	ENSG00000147180
TCTE3	-0.939442	0.000559297	ENSG00000184786
TCTE3	-0.939442	0.000559297	ENSG00000275368
SIRT7	-0.658212	0.000559608	ENSG00000187531
CTHRC1	1.14927	0.000563602	ENSG00000164932
MFAP3L	1.00737	0.000564664	ENSG00000198948
IL12RB2	1.03438	0.000564701	ENSG00000081985
RAB15	0.949525	0.000566858	ENSG00000139998
PGK1	0.663821	0.000566897	ENSG00000102144
NRN1L	-1.23788	0.000573303	ENSG00000188038
MRPL54	-0.659759	0.000576525	ENSG00000183617
SPATA2	0.587254	0.000576769	ENSG00000158480
SYNGR2	-0.766432	0.000577787	ENSG00000108639
CEACAM4	-2.16512	0.000578868	ENSG00000105352
CEACAM4	-2.16512	0.000578868	ENSG00000274131
HAGHL	1.21098	0.000586193	ENSG00000103253
COX7C	-0.592782	0.000592069	ENSG00000127184
PRLR	-1.65694	0.00060501	ENSG00000113494
ICAM1	-0.732961	0.000619707	ENSG00000090339
CLCNKB	1.53202	0.000621265	ENSG00000184908
LAMC2	-1.71669	0.00062169	ENSG00000058085
DBNDD1	1.30532	0.000623077	ENSG00000003249
GOLT1A	-2.15808	0.000626753	ENSG00000174567
LINC00493	-0.606535	0.000637141	ENSG00000232388
SLC20A1	0.782801	0.000638665	ENSG00000144136
AL365181.2	-1.08438	0.000639918	ENSG00000280316
PRDX4	0.638425	0.000643364	ENSG00000123131
KIAA0922	0.678292	0.000645021	ENSG00000121210
PLEKHS1	1.76104	0.000648874	ENSG00000148735
DHRSX	-0.587067	0.000650223	ENSG00000169084
SLC27A2	1.7335	0.000663236	ENSG00000140284
PDZK1IP1	-1.34315	0.000667876	ENSG00000162366
APOBEC3G	-0.782955	0.000670582	ENSG00000239713
OLFM1	-0.789466	0.000673211	ENSG00000130558
CTB-50L17.14	-1.96052	0.000674614	ENSG00000267385
GFRA2	1.32117	0.00067675	ENSG00000168546
DKK1	1.34573	0.000677938	ENSG00000107984
NFATC1	0.661015	0.00067917	ENSG00000131196
HSCB	-0.589712	0.00068402	ENSG00000100209
MTTP	1.30788	0.000692891	ENSG00000138823
CHAF1B	-0.689989	0.000696439	ENSG00000159259
TMEM64	0.644858	0.000698362	ENSG00000180694
TNFRSF11B	0.829789	0.000703794	ENSG00000164761
GKAP1	-0.645807	0.000714371	ENSG00000165113
CPT1C	0.655339	0.000714746	ENSG00000169169
PDLIM3	1.07172	0.000723003	ENSG00000154553
EFNB3	1.25476	0.000736421	ENSG00000108947
SP110	-0.71778	0.000737028	ENSG00000135899
CMTM8	-0.957072	0.000749008	ENSG00000170293
C4orf47	0.765893	0.000757977	ENSG00000205129
ANGPTL4	-1.25146	0.00075851	ENSG00000167772
SSC5D	1.09127	0.000762609	ENSG00000179954
FOLR1	1.32512	0.000771645	ENSG00000110195
SSTR2	1.09305	0.000782771	ENSG00000180616
GCDH	-0.636901	0.000783629	ENSG00000105607
H2AFJ	-0.657578	0.000788526	ENSG00000246705
DNM1	0.707129	0.000797357	ENSG00000106976
MDC1	-0.969269	0.000803726	ENSG00000225589
MDC1	-0.969269	0.000803726	ENSG00000234012
TWIST2	-0.735976	0.000808892	ENSG00000233608
CAMLG	-0.6438	0.000810134	ENSG00000164615
TCAF2	0.797346	0.000811741	ENSG00000170379
PDK3	0.63889	0.000819081	ENSG00000067992
AMOTL1	0.650553	0.000819081	ENSG00000166025
CLIC1	-0.629169	0.000822697	ENSG00000206394
CLIC1	-0.629152	0.000822697	ENSG00000213719
CLIC1	-0.629152	0.000822697	ENSG00000223639
CLIC1	-0.629152	0.000822697	ENSG00000226248
CLIC1	-0.629152	0.000822697	ENSG00000226417
CLIC1	-0.629152	0.000822697	ENSG00000226651
HERC5	-0.851234	0.000827155	ENSG00000138646
MIS18A	-0.597846	0.000828408	ENSG00000159055
COL3A1	1.34939	0.000828408	ENSG00000168542
DDX39B	-0.637608	0.000841759	ENSG00000237889
ENTPD7	0.919462	0.000842225	ENSG00000198018
PLD6	-0.923981	0.00084345	ENSG00000179598
CLDND2	-1.17181	0.000847375	ENSG00000160318
RYR1	1.19578	0.000852343	ENSG00000196218
TOMM7	-0.623426	0.000853272	ENSG00000196683
METTL12	-0.93014	0.000853272	ENSG00000214756
KDELR3	0.705574	0.000857077	ENSG00000100196
TMEM256	-0.59853	0.000865526	ENSG00000205544
NOMO1	0.755869	0.000865526	ENSG00000274779
PTX3	-1.51534	0.000885093	ENSG00000163661
KIAA1211	1.12979	0.000908035	ENSG00000109265
PREX1	0.591764	0.000909732	ENSG00000124126
DIO2	1.18937	0.000910952	ENSG00000211448
CENPH	-0.768165	0.000914586	ENSG00000153044
NUDT2	-0.745189	0.000918994	ENSG00000164978
STK38L	0.800655	0.000929353	ENSG00000211455
BMP8B	1.64434	0.00095601	ENSG00000116985
AKAP1	-0.669374	0.000963966	ENSG00000121057
RPS4XP16	-1.01069	0.000967053	ENSG00000224892
S100A3	1.06736	0.000968157	ENSG00000188015
ERICH3	1.28979	0.000977515	ENSG00000178965
GOLGA8A	0.824622	0.000988124	ENSG00000175265
IGIP	0.622375	0.000988124	ENSG00000182700
ETHE1	-0.697123	0.000990238	ENSG00000105755
CPQ	0.647788	0.000994252	ENSG00000104324
PXMP2	-0.795169	0.000998704	ENSG00000176894
BCL6	-0.869514	0.00100728	ENSG00000113916
DACT2	1.40285	0.00101671	ENSG00000164488
CTSF	0.792813	0.00101671	ENSG00000174080
FAM179B	0.616384	0.0010176	ENSG00000198718
HAPLN1	1.00044	0.00102416	ENSG00000145681
EIF3C	-0.639788	0.00102491	ENSG00000184110
TPPP3	1.4373	0.00102607	ENSG00000159713
NKX3-2	0.884038	0.00102872	ENSG00000109705
C15orf62	-1.18262	0.00103777	ENSG00000188277
GPR133	-1.17838	0.00104156	ENSG00000111452
C1orf87	-1.4023	0.00104242	ENSG00000162598
E2F1	-1.06697	0.00104555	ENSG00000101412
BZW2	-0.719544	0.00105625	ENSG00000136261
TFR2	0.836171	0.00105848	ENSG00000106327
C7orf55-LUC7L2	0.604262	0.00105848	ENSG00000146963
HIST1H1E	-1.5077	0.00105877	ENSG00000168298
GRIK3	1.11028	0.00106073	ENSG00000163873
FAM150B	-2.07263	0.00106563	ENSG00000189292
SBSN	-1.88459	0.0010678	ENSG00000189001
NUCB2	0.654816	0.00106953	ENSG00000070081
PFKFB4	0.918338	0.00108085	ENSG00000114268
SEPHS2P1	1.89965	0.00108085	ENSG00000250247
ZNF487	-0.622839	0.00108186	ENSG00000243660
ALDH2	-0.723628	0.00108561	ENSG00000111275
ZBTB16	-0.884758	0.00108603	ENSG00000109906
P3H4	0.742124	0.00108615	ENSG00000141696
GBP1P1	-0.997313	0.00108803	ENSG00000225492
ZNF704	0.703669	0.00108967	ENSG00000164684
FOXI2	-1.44113	0.00108967	ENSG00000186766
GLT8D2	0.59906	0.00109404	ENSG00000120820
MIA	0.974469	0.00109527	ENSG00000261857
VWC2	1.11347	0.00112749	ENSG00000188730
ZNF280B	1.1569	0.00112749	ENSG00000275004
ZNF280B	1.1569	0.00112749	ENSG00000277421
JADE1	-0.587018	0.00112881	ENSG00000077684
PTPRZ1	1.46409	0.00114091	ENSG00000106278
COL9A3	1.05743	0.0011504	ENSG00000092758
CLASP2	0.623888	0.00115864	ENSG00000163539
BAZ1A	-0.710887	0.00116539	ENSG00000198604
PLCH2	-1.88814	0.00116668	ENSG00000149527
ARHGAP4	-1.00208	0.00117119	ENSG00000089820
LMBRD2	0.82661	0.00117413	ENSG00000164187
PAQR4	1.28166	0.00117428	ENSG00000162073
CD68	-0.907374	0.00117972	ENSG00000129226
ZNF480	-0.613034	0.00118087	ENSG00000198464
PTPN3	0.632273	0.00118233	ENSG00000070159
ZNF703	-0.721627	0.00118915	ENSG00000183779
PCDH11X	-1.48356	0.00119755	ENSG00000102290
WNT7B	1.26637	0.00119924	ENSG00000188064
GDF1	1.4202	0.00121242	ENSG00000130283
FAM171A1	0.889566	0.00121711	ENSG00000148468
EEF1DP3	-1.46252	0.0012181	ENSG00000229715
SDCBP2	-0.787172	0.00124651	ENSG00000125775
HHIPL1	0.71715	0.00124651	ENSG00000182218
SYNE2	-0.744781	0.0012507	ENSG00000054654
KDELC1	0.651642	0.00125641	ENSG00000134901
SYTL3	0.65994	0.0012732	ENSG00000164674
BCL2L12	-0.69865	0.00128828	ENSG00000126453
WNT16	1.46036	0.00129004	ENSG00000002745
LIAS	-0.593501	0.0012931	ENSG00000121897
TAF1A	0.640366	0.0013011	ENSG00000143498
C12orf60	0.697992	0.00130311	ENSG00000182993
MGST1	-1.13253	0.00132627	ENSG00000008394
RHOBTB3	-0.730163	0.00132646	ENSG00000164292
PPP2R3B	1.95882	0.00132691	ENSG00000276438
TNN	1.33646	0.00134447	ENSG00000120332
MT1A	-0.973689	0.00134608	ENSG00000205362
PKHD1L1	-1.96329	0.0013474	ENSG00000205038
ARMC3	1.72974	0.0013482	ENSG00000165309
MT1P3	-1.89501	0.0013482	ENSG00000229230
NAALADL2	0.830824	0.00135653	ENSG00000177694
LGALS4	-1.18835	0.00135867	ENSG00000171747
BEND7	-0.895137	0.00136423	ENSG00000165626
VSX1	-1.43095	0.00136731	ENSG00000100987
PRR16	-0.836211	0.00136748	ENSG00000184838
SHISA9	1.04622	0.00137011	ENSG00000237515
SLC16A1	0.696089	0.00137094	ENSG00000155380
SLC16A1	0.696089	0.00137094	ENSG00000281917
SH3GL3	-1.20542	0.00138257	ENSG00000140600
SLC22A17	0.67083	0.00139578	ENSG00000092096
GRIP2	1.3157	0.00140083	ENSG00000144596
SQLE	0.634302	0.00140503	ENSG00000104549
NTHL1	-0.843378	0.00141291	ENSG00000065057
RAD51AP2	1.40774	0.00141748	ENSG00000214842
HTRA3	0.881193	0.0014492	ENSG00000170801
RRAS	-0.604822	0.00145993	ENSG00000126458
CFP	-1.58234	0.00146576	ENSG00000126759
NME1-NME2	-1.72254	0.00146693	ENSG00000280803
SPSB2	-0.754455	0.0014676	ENSG00000111671
ADAM15	-0.615263	0.00147879	ENSG00000143537
SPON1	1.10322	0.00149014	ENSG00000262655
ABCA8	0.887531	0.00149851	ENSG00000141338
B4GALT6	0.717638	0.00149853	ENSG00000118276
DDX54	-0.608069	0.00152373	ENSG00000123064
GLDN	0.766298	0.00154255	ENSG00000186417
PCOLCE	0.937241	0.00154836	ENSG00000106333
TRIB3	-1.0021	0.00155117	ENSG00000101255
OXGR1	1.74073	0.00155485	ENSG00000165621
C3orf70	0.924539	0.00155485	ENSG00000187068
AQP3	0.849368	0.0015556	ENSG00000165272
GK5	0.686023	0.00158151	ENSG00000175066
MAN1C1	-0.871636	0.00159595	ENSG00000117643
DNAJC22	1.03137	0.00159729	ENSG00000178401
DOC2B	1.02123	0.00160289	ENSG00000272636
MARCH3	-0.802517	0.00160797	ENSG00000173926
SPAG5	-0.88092	0.00161533	ENSG00000076382
STK26	0.977041	0.00161533	ENSG00000134602
GPR68	1.13614	0.00162285	ENSG00000119714
ZIC4	-1.27493	0.00162349	ENSG00000174963
LGALS17A	-1.94436	0.00164656	ENSG00000226025
SPSB4	0.91248	0.00165453	ENSG00000175093
MYRFL	1.70583	0.00166506	ENSG00000166268
C20orf27	-0.65079	0.00166867	ENSG00000101220
LGR5	-1.78175	0.00167323	ENSG00000139292
AC004057.1	-1.25277	0.00167871	ENSG00000196656
SCD	0.779421	0.0016824	ENSG00000099194
FN1	0.850086	0.00169751	ENSG00000115414
HARBI1	0.737789	0.00169864	ENSG00000180423
LHPP	0.781218	0.00170011	ENSG00000107902
ADRA2A	0.947925	0.00170448	ENSG00000150594
GH1	-0.984543	0.00170592	ENSG00000259384
FAM19A3	1.17171	0.00171017	ENSG00000184599
DCHS1	0.602699	0.00172735	ENSG00000166341
RPL23A	-0.688664	0.00173443	ENSG00000198242
FKBP14	0.697496	0.00174587	ENSG00000106080
CSMD1	1.57072	0.00178305	ENSG00000183117
ACSL5	-0.810722	0.001787	ENSG00000197142
IDUA	0.584976	0.00179029	ENSG00000127415
IGSF3	0.817518	0.00179029	ENSG00000143061
RPL7P19	1.64305	0.00179943	ENSG00000241458
CACNA1E	1.42131	0.00184357	ENSG00000198216
PAQR3	0.635942	0.00185567	ENSG00000163291
FGF18	0.962146	0.00186741	ENSG00000156427
PRORSD1P	-0.796842	0.00186751	ENSG00000162997
PIGZ	-0.601311	0.00186901	ENSG00000119227
SULT1C2	-1.15893	0.00187787	ENSG00000198203
LSP1	0.74426	0.00189038	ENSG00000130592
MED16	-0.594845	0.00190159	ENSG00000175221
NMNAT3	-0.881627	0.00195851	ENSG00000163864
MMP7	-1.64304	0.00196082	ENSG00000137673
CCNB3	-1.43341	0.00196619	ENSG00000147082
CASP12	-0.885247	0.00196663	ENSG00000204403
TMEM59L	1.37432	0.00201629	ENSG00000105696
LSAMP	1.08322	0.00202346	ENSG00000185565
MEF2BNB-MEF2B	-0.672386	0.0020316	ENSG00000064489
FAM102B	0.952374	0.00203258	ENSG00000162636
IKBIP	0.606137	0.00212238	ENSG00000166130
PAFAH2	0.592161	0.0021343	ENSG00000158006
ARHGAP25	-1.12977	0.00214872	ENSG00000163219
PLOD1	0.686522	0.00216098	ENSG00000083444
DOCK9	0.668303	0.00216914	ENSG00000088387
MFAP2	-0.896374	0.00216914	ENSG00000117122
PLA2G4A	0.684293	0.00217577	ENSG00000116711
CRLF1	1.18556	0.00219706	ENSG00000006016
MRPL21	-0.588196	0.00219706	ENSG00000197345
BNC2	-0.994796	0.00220676	ENSG00000173068
ARNTL	-0.823658	0.00221281	ENSG00000133794
RPL22L1	-0.619635	0.00221281	ENSG00000163584
RP11-434D2.9	-1.23799	0.0022219	ENSG00000265916
SLC25A53	-0.588261	0.002238	ENSG00000269743
LRRC66	0.933374	0.00224426	ENSG00000188993
TSPAN14	-0.885483	0.00224809	ENSG00000108219
CTSB	-0.59991	0.00225696	ENSG00000164733
IL6R	-0.649625	0.0022679	ENSG00000160712
DUSP15	-0.833344	0.00227268	ENSG00000149599
GNL1	-0.887691	0.00227268	ENSG00000206492
RRAGD	-0.716582	0.00227355	ENSG00000025039
CLP1	0.634943	0.00228347	ENSG00000172409
ALPK3	0.834263	0.00228653	ENSG00000136383
PTPRCAP	-1.48033	0.00229601	ENSG00000213402
AMDHD2	-0.696442	0.00231139	ENSG00000162066
ZCCHC5	0.915444	0.00231139	ENSG00000179300
FZD5	-0.804066	0.00231677	ENSG00000163251
MYCBP	0.657237	0.00233491	ENSG00000214114
NUDT1	-0.620035	0.00234927	ENSG00000106268
SLC19A2	-0.663655	0.00235559	ENSG00000117479
GADD45G	-1.08159	0.00236099	ENSG00000130222
HSPD1P11	-1.28167	0.00237736	ENSG00000251348
PRRG1	-0.777235	0.00242847	ENSG00000130962
MICALL2	0.682504	0.00242876	ENSG00000164877
DAPK2	-0.825817	0.00244811	ENSG00000035664
ACRC	0.782932	0.00245693	ENSG00000147174
TMEM176A	1.4684	0.00250693	ENSG00000002933
PER3	0.679675	0.00250693	ENSG00000049246
CELSR1	0.602015	0.00251722	ENSG00000075275
DIRAS3	-0.900829	0.00252544	ENSG00000162595
NLGN4X	1.10663	0.00252627	ENSG00000146938
KCNAB2	-0.695321	0.00254332	ENSG00000069424
TLR4	-0.944015	0.00255211	ENSG00000136869
GSG1L	1.73438	0.00255371	ENSG00000169181
SCML2	0.638811	0.00255646	ENSG00000102098
SLPI	-1.2609	0.00255646	ENSG00000124107
LETM2	-0.869641	0.00257765	ENSG00000165046
GCHFR	-0.786262	0.00258402	ENSG00000137880
SLFN5	-0.916862	0.00259674	ENSG00000166750
KCNN3	1.01445	0.00260202	ENSG00000143603
C8orf82	-0.636425	0.00260645	ENSG00000213563
RNF39	-1.9302	0.00262652	ENSG00000204618
RNF39	-1.9302	0.00262652	ENSG00000230332
PDK1	0.697746	0.00264166	ENSG00000152256
ZNF296	-0.938808	0.00264166	ENSG00000170684
LTB4R2	-0.975543	0.00264859	ENSG00000213906
KLHL29	0.697418	0.00267343	ENSG00000119771
ZNF781	0.777061	0.00267841	ENSG00000196381
MZT2A	-0.610369	0.00268104	ENSG00000173272
HMGN2P5	-1.70249	0.00269878	ENSG00000234664
AC243587.1	-1.70249	0.00269878	ENSG00000272101
SYNE3	-0.624189	0.00274542	ENSG00000176438
ZDHHC20	0.606001	0.0027668	ENSG00000180776
EEF1A1P6	-0.633443	0.00279759	ENSG00000233476
SDK2	0.704518	0.00280751	ENSG00000069188
SYCP2	0.70986	0.00282098	ENSG00000196074
BAMBI	0.676709	0.0029524	ENSG00000095739
KIF2C	-1.09871	0.00295851	ENSG00000142945
C12orf45	-0.677271	0.00295982	ENSG00000151131
DHRS2	-1.19552	0.00296394	ENSG00000100867
JAK3	0.687491	0.00296394	ENSG00000105639
C2orf40	0.879957	0.00297478	ENSG00000119147
OPRL1	1.14418	0.00297749	ENSG00000125510
RP11-65B7.2	0.980844	0.00297749	ENSG00000281883
B3GALT1	0.755965	0.00301633	ENSG00000172318
NBEAP3	1.25292	0.00302041	ENSG00000223875
PSORS1C1	-1.20208	0.00302894	ENSG00000204540
SH3BP5	-0.598905	0.00304884	ENSG00000131370
NUAK2	-1.6159	0.0030709	ENSG00000163545
FBXW4P1	-1.49177	0.00310167	ENSG00000230701
STEAP3	0.607133	0.00310217	ENSG00000115107
NDP	0.807047	0.00310217	ENSG00000124479
MRC2	0.667455	0.00312013	ENSG00000011028
TAF4	-0.825835	0.0031346	ENSG00000130699
SLC22A23	1.00567	0.00314695	ENSG00000137266
SLC4A11	1.2637	0.00321183	ENSG00000088836
ZC3HAV1L	0.672929	0.00322028	ENSG00000146858
TTC36	-1.51022	0.00322028	ENSG00000172425
CACNA1H	1.25228	0.00324575	ENSG00000196557
ZNF385A	0.588762	0.0032498	ENSG00000161642
SNX22	1.17046	0.00325548	ENSG00000157734
SMOX	-0.924638	0.00328226	ENSG00000088826
FAM174B	-0.636353	0.00331846	ENSG00000185442
GLCE	-0.751662	0.00332519	ENSG00000138604
BGN	0.614016	0.00332519	ENSG00000182492
EGR3	-1.17053	0.00333408	ENSG00000179388
FST	-1.33825	0.00336457	ENSG00000134363
KLF5	-0.850445	0.00337499	ENSG00000102554
STK32A	1.0328	0.00341116	ENSG00000169302
SLC15A3	-0.638291	0.0034364	ENSG00000110446
CTD-2195M15.1	1.16871	0.00346727	ENSG00000249577
NELL2	1.50217	0.00347916	ENSG00000184613
STC2	-1.02312	0.00347942	ENSG00000113739
CCDC101	-0.586627	0.00347942	ENSG00000176476
MFI2	0.698702	0.00348633	ENSG00000163975
CLEC3B	1.23992	0.00349519	ENSG00000163815
PDE4C	1.25187	0.0035467	ENSG00000105650
DLX5	0.722143	0.00358389	ENSG00000105880
TDGF1	-1.37544	0.00360602	ENSG00000241186
SESN1	-0.58855	0.00362224	ENSG00000080546
FCF1P2	0.667467	0.00362224	ENSG00000228638
TCTE1	-1.23853	0.00362379	ENSG00000146221
CXCL14	1.26238	0.00367848	ENSG00000145824
GYPE	0.879492	0.00377337	ENSG00000197465
CD1D	-0.997436	0.00377795	ENSG00000158473
MT1F	-0.942688	0.00378492	ENSG00000198417
ADH4	-1.39257	0.00379206	ENSG00000198099
CDCA5	-1.08505	0.00381066	ENSG00000146670
HOOK2	0.623349	0.00381387	ENSG00000095066
ANK2	0.870947	0.00385274	ENSG00000145362
UBE2Q2P6	-1.33579	0.00385808	ENSG00000237550
MAP4K4	-0.795381	0.00385952	ENSG00000071054
IRF4	-1.32855	0.00385952	ENSG00000137265
C3orf52	1.20937	0.00386998	ENSG00000114529
PSMB8	-0.814443	0.00386998	ENSG00000231631
BVES	0.760395	0.00388775	ENSG00000112276
KIF26A	-0.605139	0.00390306	ENSG00000066735
LMNB2	-0.630483	0.00392619	ENSG00000176619
MRAP2	0.9569	0.00395623	ENSG00000135324
BEX1	-1.19255	0.00396313	ENSG00000133169
ZNF223	0.669165	0.00396313	ENSG00000178386
ARL4C	-1.24876	0.00396313	ENSG00000188042
ZNF843	0.695714	0.0040321	ENSG00000176723
ANXA2R	-0.756556	0.00406938	ENSG00000177721
DLGAP2	-1.36381	0.00409937	ENSG00000198010
CEP19	0.612837	0.00411349	ENSG00000174007
KIAA0895L	0.642284	0.00411716	ENSG00000196123
SLC9A3R2	-0.689649	0.00416633	ENSG00000065054
L1TD1	1.65156	0.00417808	ENSG00000240563
RP11-253E3.1	-1.29915	0.0041914	ENSG00000234589
MMP10	-1.75377	0.00419944	ENSG00000166670
BAIAP2L2	-1.13967	0.00420417	ENSG00000128298
CHST3	0.721619	0.00422326	ENSG00000122863
MBOAT7	-0.708254	0.00422326	ENSG00000125505
DDAH1	0.58666	0.00422759	ENSG00000153904
CTD-3105H18.18	-1.06284	0.00422776	ENSG00000269755
FDXR	-0.657034	0.00422825	ENSG00000161513
ERLEC1P1	1.23587	0.00422996	ENSG00000240755
LIPG	-1.44332	0.00423434	ENSG00000101670
NMT1	-0.585144	0.00425671	ENSG00000136448
IL18BP	-0.738016	0.00425729	ENSG00000137496
HOXA13	0.628586	0.00426339	ENSG00000106031
MPZ	-0.93102	0.00431038	ENSG00000158887
BST1	-0.893307	0.0043198	ENSG00000109743
ZNF667	0.800098	0.00432384	ENSG00000198046
TAP1	-1.56558	0.00433474	ENSG00000224748
STAP2	-0.971466	0.00433966	ENSG00000178078
C15orf65	0.758466	0.00437012	ENSG00000261652
DMRTA1	0.767634	0.0044279	ENSG00000176399
ADAM32	1.01817	0.00444201	ENSG00000197140
DSCAML1	0.80685	0.00444608	ENSG00000177103
S100A16	-0.609705	0.00445856	ENSG00000188643
FXYD2	0.882352	0.00464584	ENSG00000137731
UPK1B	1.33388	0.00464594	ENSG00000114638
NMUR1	1.17758	0.0046671	ENSG00000171596
TRAPPC6A	-0.643324	0.00473687	ENSG00000007255
TIPARP	-0.884464	0.00474507	ENSG00000163659
ZDHHC21	0.82804	0.00474507	ENSG00000175893
SLC15A2	1.08306	0.00476391	ENSG00000163406
TBC1D24	0.677472	0.00477362	ENSG00000162065
TTC3P1	0.703204	0.00478828	ENSG00000215105
TNK2	-0.585987	0.00481503	ENSG00000061938
MMP17	-1.32722	0.00485421	ENSG00000198598
C17orf61-PLSCR3	-1.14093	0.00488814	ENSG00000262481
ANGPTL1	0.909603	0.00489432	ENSG00000116194
RGPD8	0.890405	0.00490027	ENSG00000169629
ZYX	-0.640967	0.00492519	ENSG00000159840
MT1JP	-1.18052	0.00492519	ENSG00000255986
PTK6	0.857517	0.00493718	ENSG00000101213
CSGALNACT1	0.656918	0.00494353	ENSG00000147408
FSTL3	-0.781759	0.00497248	ENSG00000070404
TGFBI	1.15502	0.00497248	ENSG00000120708
MYLPF	-1.08256	0.0050018	ENSG00000180209
GVQW1	0.95109	0.0050018	ENSG00000241043
PER2	0.594088	0.00506588	ENSG00000132326
NRXN3	1.41342	0.00517429	ENSG00000021645
LAYN	-0.60596	0.00517813	ENSG00000204381
ARHGEF37	-0.854928	0.00520016	ENSG00000183111
GPSM2	0.67992	0.00523714	ENSG00000121957
ARHGAP39	0.750249	0.00524792	ENSG00000147799
FAM162A	0.627133	0.0052679	ENSG00000114023
ZNF99	1.32314	0.00528772	ENSG00000213973
PLK3	-0.703084	0.00529023	ENSG00000173846
CKS2	-0.889345	0.00529724	ENSG00000123975
CNTN2	1.5334	0.00533964	ENSG00000184144
GABRG3	1.64595	0.00534577	ENSG00000182256
IL27RA	0.596525	0.00539379	ENSG00000104998
PAOX	-0.660748	0.00539379	ENSG00000148832
EIF4EBP1	-0.681913	0.00539379	ENSG00000187840
LRP5L	-0.782308	0.00547478	ENSG00000100068
PPP1R14C	0.968061	0.00549452	ENSG00000198729
RBAK-RBAKDN	-1.11725	0.00550573	ENSG00000272968
MROH8	0.707921	0.00550986	ENSG00000101353
RNF180	0.782869	0.00552949	ENSG00000164197
NME5	0.677666	0.00553559	ENSG00000112981
GCOM1	-0.93422	0.00556433	ENSG00000137878
DGKK	1.74229	0.00556495	ENSG00000274588
RNF157	-0.887513	0.00557485	ENSG00000141576
AC104809.3	-1.46565	0.00560286	ENSG00000226321
PARN	-0.973692	0.00560787	ENSG00000274829
LOC440461	-1.58735	0.00570396	ENSG00000267472
SPDYE7P	-1.27295	0.00570867	ENSG00000179994
EBPL	-0.604336	0.00571717	ENSG00000123179
AQP6	0.986975	0.00576252	ENSG00000086159
TMEM151B	-1.01264	0.00577122	ENSG00000178233
NCOA7	-0.596769	0.00579123	ENSG00000111912
MLK4	0.882725	0.0057983	ENSG00000143674
PDE4B	0.800239	0.00582265	ENSG00000184588
FGFR1	0.592306	0.00584968	ENSG00000077782
PCDHB15	0.836119	0.00589838	ENSG00000113248
EML1	0.827387	0.00596548	ENSG00000066629
TMEM160	-0.625817	0.00596548	ENSG00000130748
SMPD3	1.42749	0.005987	ENSG00000103056
ZNF185	-0.671241	0.00601146	ENSG00000147394
C5orf49	-0.79837	0.00601864	ENSG00000215217
RP11-705C15.2	-0.793642	0.00607484	ENSG00000256594
PARVB	-0.680969	0.00608515	ENSG00000188677
EEF1A1P11	-0.935313	0.00609392	ENSG00000228502
TACSTD2	-1.174	0.00611603	ENSG00000184292
AJUBA	-0.68677	0.00611638	ENSG00000129474
WFIKKN2	-1.1108	0.00611638	ENSG00000173714
TCP11	-1.13028	0.00611965	ENSG00000124678
GIPC2	-0.920633	0.00615487	ENSG00000137960
PPM1L	-0.850234	0.00616323	ENSG00000163590
RP11-572P18.1	-0.721931	0.00617717	ENSG00000220842
RPS4XP5	1.11434	0.00617717	ENSG00000229920
NOTCH1	-0.767807	0.00621665	ENSG00000148400
C1QTNF2	1.06495	0.00621971	ENSG00000145861
C2orf72	0.861137	0.00625184	ENSG00000204128
RGS13	1.60789	0.00627136	ENSG00000127074
LHFP	0.602655	0.00627136	ENSG00000183722
PANX2	-1.01021	0.00628544	ENSG00000073150
CDC42EP4	-0.643079	0.00629434	ENSG00000179604
RASSF5	-0.605145	0.0063622	ENSG00000266094
LGR6	1.0824	0.00639093	ENSG00000133067
ZBED6	0.771555	0.00639093	ENSG00000257315
NLRP1	0.782598	0.00643719	ENSG00000091592
RPS26	-1.01595	0.00644295	ENSG00000197728
FGL1	1.46539	0.0064552	ENSG00000104760
BCL3	-0.637912	0.0064649	ENSG00000069399
LBP	-1.2309	0.00650378	ENSG00000129988
ITSN1	0.664922	0.00650378	ENSG00000205726
TRPM3	1.36859	0.00651314	ENSG00000083067
CRB2	1.62231	0.00651899	ENSG00000148204
CHADL	0.806102	0.0065359	ENSG00000100399
UNC5A	-1.58105	0.00656557	ENSG00000113763
LRIT3	0.947303	0.00666721	ENSG00000183423
PLA2G7	-1.514	0.00666861	ENSG00000146070
ABCC1	0.643507	0.00667407	ENSG00000278183
ZNF816-ZNF321P	-0.990035	0.00668472	ENSG00000213801
KLHL3	0.629822	0.00670963	ENSG00000146021
ST20-MTHFS	-0.858239	0.00675523	ENSG00000259332
FDCSP	1.74203	0.00676956	ENSG00000181617
SPAG17	0.808744	0.00679803	ENSG00000155761
GOLGA8J	0.709492	0.00682431	ENSG00000278119
SLC11A1	-1.24176	0.00684797	ENSG00000018280
CACNA2D1	0.75325	0.00684797	ENSG00000153956
ABCA1	-0.889172	0.00690291	ENSG00000165029
INHBB	-1.38114	0.00696657	ENSG00000163083
PLCD3	-0.59601	0.00699143	ENSG00000161714
PTK2B	-0.639635	0.00699695	ENSG00000120899
MCOLN3	0.70719	0.00699945	ENSG00000055732
SERTAD1	-0.68489	0.00700155	ENSG00000197019
BTC	0.846874	0.00705114	ENSG00000174808
ERVMER34-1	-0.588726	0.00708073	ENSG00000226887
RNF165	1.44689	0.00708231	ENSG00000141622
NFE2L3	1.25165	0.00715575	ENSG00000050344
SMIM5	0.794686	0.00718187	ENSG00000204323
LTBP1	0.757865	0.0071846	ENSG00000049323
BMS1P2	0.909974	0.00719468	ENSG00000251079
HIST2H2BC	-1.00974	0.00721807	ENSG00000203819
PLA2G2A	0.735462	0.00724035	ENSG00000188257
THADA	-0.636357	0.00724525	ENSG00000115970
INCA1	-0.860536	0.00728964	ENSG00000196388
ALS2CR11	1.06016	0.00736745	ENSG00000155754
SLC39A11	0.682835	0.00747199	ENSG00000133195
NKD1	0.900836	0.00750783	ENSG00000140807
GALNT14	1.08208	0.00750783	ENSG00000158089
FAM107B	0.598439	0.00757843	ENSG00000065809
FBLN5	0.924621	0.00759837	ENSG00000140092
CLEC18B	1.10415	0.00764826	ENSG00000140839
SEPT1	-0.825642	0.00767583	ENSG00000180096
OSM	-1.62945	0.00769453	ENSG00000099985
LNP1	0.617268	0.00770166	ENSG00000206535
CLCNKA	1.33145	0.0077266	ENSG00000186510
SPAG6	0.727797	0.00782551	ENSG00000077327
MATN2	0.694161	0.00782576	ENSG00000132561
FAXDC2	-0.727382	0.00785181	ENSG00000170271
PPEF2	-1.58219	0.00786969	ENSG00000156194
SLC2A9	-0.882275	0.00787008	ENSG00000109667
S100A9	-1.6054	0.00792072	ENSG00000163220
PCBP3	-1.00595	0.00798937	ENSG00000183570
TEX38	-1.59037	0.00801944	ENSG00000186118
SNURF	0.66811	0.00802431	ENSG00000214265
RELN	1.24143	0.00804621	ENSG00000189056
SGK223	-0.900639	0.00810915	ENSG00000275342
CYP2D6	-1.60149	0.00812029	ENSG00000275211
ASIP	0.863001	0.00812996	ENSG00000101440
COL5A1	0.951702	0.00814845	ENSG00000130635
RAPGEF3	-0.723288	0.00819603	ENSG00000079337
NEURL2	-0.661502	0.00821128	ENSG00000124257
KL	0.911298	0.00821493	ENSG00000133116
MROH6	-0.815314	0.00823296	ENSG00000204839
PLEKHO1	-0.830638	0.0082997	ENSG00000023902
PRIMA1	-1.11228	0.0082997	ENSG00000175785
PRIMA1	-1.11228	0.0082997	ENSG00000274089
TGFB3	0.721184	0.00833661	ENSG00000119699
ITM2C	0.630882	0.00834209	ENSG00000135916
HSPA8P4	0.953937	0.00834209	ENSG00000248610
PLEKHA6	-0.93393	0.0083938	ENSG00000143850
SYN2	-1.10539	0.00848167	ENSG00000157152
CXCL3	-1.45623	0.00854499	ENSG00000163734
TMEM74	1.15858	0.00861182	ENSG00000164841
AQP9	-1.69084	0.00861939	ENSG00000103569
DEF6	-0.613642	0.00864192	ENSG00000023892
FAM132A	-1.25748	0.00866848	ENSG00000184163
SLIT1	-1.52623	0.00869299	ENSG00000187122
ATP2A3	0.739265	0.00872415	ENSG00000074370
CENPW	-0.824836	0.00877376	ENSG00000203760
PCDH17	-1.33381	0.00877415	ENSG00000118946
RTN2	-0.719363	0.00880903	ENSG00000125744
WBSCR17	0.948754	0.00884706	ENSG00000185274
RPL41P2	-0.888537	0.00888261	ENSG00000256338
PEBP4	-0.973431	0.00888987	ENSG00000134020
MEGF10	0.695763	0.00888987	ENSG00000145794
SPINT1	0.770894	0.00888987	ENSG00000166145
OR7E36P	-1.17957	0.00888987	ENSG00000205240
LMCD1	-0.59608	0.0089509	ENSG00000071282
CNTN4	1.08331	0.00900479	ENSG00000144619
PILRA	-1.00412	0.00903568	ENSG00000085514
COMP	0.752699	0.00904544	ENSG00000105664
ARIH2OS	-0.639704	0.00906786	ENSG00000221883
PTGER3	0.910961	0.0091893	ENSG00000050628
HIVEP1	0.600701	0.00924192	ENSG00000095951
TMEM151A	0.91322	0.00931101	ENSG00000179292
MYL10	1.21516	0.00931568	ENSG00000106436
ARSB	0.609321	0.00932647	ENSG00000113273
TNNC1	-0.829315	0.00942255	ENSG00000114854
HK2	0.625855	0.00942255	ENSG00000159399
KIF21B	-0.946206	0.00952597	ENSG00000116852
ZFP36L2	-0.709291	0.00954307	ENSG00000152518
SOCS1	-1.00169	0.00954307	ENSG00000185338
GPR179	-1.30422	0.00954307	ENSG00000276469
KLHL10	-1.38003	0.00961258	ENSG00000161594
RPS2P5	-1.04354	0.00964733	ENSG00000240342
DKK2	-1.27617	0.00972017	ENSG00000155011
KIAA1161	0.777103	0.00972673	ENSG00000164976
SLC10A6	-1.39383	0.00975644	ENSG00000145283
SHB	-0.941419	0.00983042	ENSG00000107338
AIM2	-1.26364	0.00986468	ENSG00000163568
LPCAT2	-0.766336	0.00987181	ENSG00000087253
PDGFC	0.702304	0.0100132	ENSG00000145431
SLC37A1	-0.618616	0.0100132	ENSG00000160190
HBEGF	1.0716	0.0100603	ENSG00000113070
MAP3K12	-0.637098	0.010078	ENSG00000139625
DUSP19	0.726857	0.0101243	ENSG00000162999
ULBP3	0.862261	0.0101263	ENSG00000131019
HOMER1	0.883529	0.0101331	ENSG00000152413
NUP210	-1.12217	0.0101476	ENSG00000132182
FSIP2	0.639793	0.0102183	ENSG00000188738
CCBE1	-1.20167	0.0102309	ENSG00000183287
SPOCK1	0.843168	0.0102322	ENSG00000152377
RAB38	0.898387	0.0102814	ENSG00000123892
ENPP2	0.740602	0.010374	ENSG00000136960
AMT	0.678105	0.0103804	ENSG00000145020
RPS2P46	-0.991289	0.0104014	ENSG00000189343
CYP2A6	-1.68556	0.0104977	ENSG00000255974
PHOSPHO1	1.08106	0.0105621	ENSG00000173868
LRRC24	-0.779892	0.0105731	ENSG00000254402
LIMS3	-1.46917	0.0105731	ENSG00000256977
MORN1	-0.610688	0.0106201	ENSG00000116151
PITX3	-1.51371	0.0106464	ENSG00000107859
VLDLR	0.623258	0.0106464	ENSG00000147852
BGLAP	1.53345	0.0106742	ENSG00000242252
IL17B	1.51391	0.0107787	ENSG00000127743
LAMC3	-1.10426	0.0108321	ENSG00000050555
PROX1	-1.46408	0.0108414	ENSG00000117707
KLRAP1	0.695852	0.0108414	ENSG00000256667
TAP1	-0.680428	0.0108525	ENSG00000168394
TAP1	-0.680428	0.0108525	ENSG00000232367
RAB3IP	-0.684935	0.0108546	ENSG00000127328
ABO	1.11632	0.0110053	ENSG00000175164
ZSWIM5	0.610778	0.0110525	ENSG00000162415
NFASC	0.88359	0.011079	ENSG00000163531
RP11-894J14.5	-0.989065	0.011079	ENSG00000272305
REEP1	1.26346	0.0111325	ENSG00000068615
ZNF555	0.594489	0.0111325	ENSG00000186300
NHSL1	-1.25607	0.0111503	ENSG00000135540
CH17-13I23.3	-1.4062	0.0111613	ENSG00000277702
NOV	1.09673	0.0111638	ENSG00000136999
ANXA8	1.35022	0.0111638	ENSG00000265190
PAEP	-1.59697	0.0111731	ENSG00000122133
CSRNP1	-0.861451	0.0112022	ENSG00000144655
CDT1	-1.0469	0.0112022	ENSG00000167513
PER1	-0.718208	0.0112225	ENSG00000179094
ITGB6	-1.24452	0.0112875	ENSG00000115221
IMPG2	0.87297	0.0113449	ENSG00000081148
PGF	0.999055	0.0113457	ENSG00000119630
ROBO2	1.01849	0.0113667	ENSG00000185008
RIMKLA	0.768631	0.0114211	ENSG00000177181
PTN	0.871589	0.0114566	ENSG00000105894
NUSAP1	-1.02196	0.0114715	ENSG00000137804
CPA6	1.10983	0.0114715	ENSG00000165078
PPAPDC1A	-1.50425	0.0114715	ENSG00000203805
AC079753.4	-1.31932	0.0115218	ENSG00000180152
BCL2L11	-0.809414	0.0115562	ENSG00000153094
DIO3	-0.929494	0.0115817	ENSG00000197406
GCGR	1.59972	0.0116049	ENSG00000215644
REM2	-0.936045	0.0116436	ENSG00000139890
NXPE4	1.05735	0.0116582	ENSG00000137634
GPHA2	1.19173	0.0118624	ENSG00000149735
ZNF827	0.628751	0.0118624	ENSG00000151612
RP1-300I2.2	1.43811	0.0119173	ENSG00000243995
DLL3	1.3074	0.0119501	ENSG00000090932
SYT17	0.651246	0.0119501	ENSG00000103528
CA12	-1.29162	0.0119773	ENSG00000074410
ARL10	0.613906	0.0120008	ENSG00000175414
CTXN1	-0.971757	0.0120037	ENSG00000178531
C6orf1	-0.608027	0.012024	ENSG00000186577
SERPINI2	1.01745	0.0120951	ENSG00000114204
HUS1B	-1.40515	0.0122074	ENSG00000188996
GCH1	-0.644703	0.0122331	ENSG00000131979
SEPT11	-0.816955	0.01224	ENSG00000138758
CCNB1	-0.803153	0.0122707	ENSG00000134057
WTAPP1	-1.01747	0.0124147	ENSG00000255282
MAK	-1.1007	0.0124365	ENSG00000111837
NINJ2	0.687302	0.0125131	ENSG00000171840
CTNND2	1.50312	0.0125535	ENSG00000169862
LRRN3	1.07576	0.0126858	ENSG00000173114
POC1A	-0.693719	0.01271	ENSG00000164087
CACNA1I	0.956693	0.0127256	ENSG00000100346
FADS2	0.700231	0.0128341	ENSG00000134824
TSPAN5	-0.674362	0.0128688	ENSG00000168785
RSU1P2	1.25542	0.012906	ENSG00000232554
CTD-2026D20.3	-0.772314	0.0129319	ENSG00000228782
KIRREL2	1.52429	0.0129697	ENSG00000126259
RBP5	-1.41713	0.0129697	ENSG00000139194
RP11-366M4.11	0.792467	0.0129817	ENSG00000248632
LRFN4	0.597243	0.0129835	ENSG00000173621
MX1	-0.661171	0.0129907	ENSG00000157601
ZNF718	0.750322	0.0129907	ENSG00000250312
RAD18	-0.617811	0.0130279	ENSG00000070950
B2M	1.51176	0.0130434	ENSG00000273686
HLA-DMA	1.63537	0.0130525	ENSG00000241394
NUDT7	-0.635522	0.0131686	ENSG00000140876
KCNMB4	0.778833	0.0132064	ENSG00000135643
HHLA2	-1.01295	0.0133235	ENSG00000114455
C8orf44	-0.685556	0.0133235	ENSG00000213865
NOTUM	1.25828	0.0133861	ENSG00000185269
MLXIPL	-1.28344	0.0134031	ENSG00000009950
FAM72A	-0.902088	0.0134168	ENSG00000196550
FAM86B1	-0.669053	0.0134572	ENSG00000186523
CDH10	1.30357	0.0135291	ENSG00000040731
MPZL2	0.824477	0.0135605	ENSG00000149573
HLA-F	-0.720233	0.013577	ENSG00000234487
C2orf82	0.813256	0.0136188	ENSG00000182600
TAP1	-0.645706	0.0137146	ENSG00000227816
TAP1	-0.645706	0.0137146	ENSG00000230705
CXCL8	-1.40917	0.0137751	ENSG00000169429
WISP2	-1.15751	0.0137818	ENSG00000064205
SOX8	0.767732	0.0138234	ENSG00000005513
SLC30A2	-1.00022	0.0138386	ENSG00000158014
PRPH2	1.2191	0.0138502	ENSG00000112619
ERVW-1	-0.624879	0.0138512	ENSG00000242950
HESX1	0.721119	0.0138638	ENSG00000163666
CNTNAP2	1.61588	0.0138851	ENSG00000174469
CLEC10A	-1.55037	0.0139188	ENSG00000132514
GLB1L3	0.761971	0.0139341	ENSG00000166105
PLEKHM1	-0.738812	0.0139488	ENSG00000225190
ADIG	1.31871	0.0140069	ENSG00000182035
KCNQ3	-1.14194	0.0140524	ENSG00000184156
MRGPRF	0.593093	0.0140588	ENSG00000172935
HTN1	0.877927	0.0141293	ENSG00000126550
ADTRP	1.01217	0.0141452	ENSG00000111863
CACNB2	-0.893821	0.0142207	ENSG00000165995
AC098614.2	-0.680418	0.0142245	ENSG00000213846
MT1L	-0.709971	0.0142739	ENSG00000260549
ADAM11	-0.89069	0.0143582	ENSG00000073670
PTRH1	-0.624304	0.0143582	ENSG00000187024
KCNE5	1.27331	0.0143779	ENSG00000176076
GUCY1A3	0.757459	0.0144907	ENSG00000164116
LRRC37A6P	1.24508	0.0145067	ENSG00000230445
LTF	-1.29238	0.0145609	ENSG00000012223
TARBP1	0.692403	0.0145609	ENSG00000059588
VIPR1	-0.923166	0.0145742	ENSG00000114812
CNTN1	-1.38501	0.0146058	ENSG00000018236
FGF14	0.936149	0.0146109	ENSG00000102466
TMSB10	-0.813207	0.0146233	ENSG00000034510
DMP1	1.5609	0.0146309	ENSG00000152592
ABHD2	0.697506	0.0146326	ENSG00000140526
ASIC1	0.75776	0.0148943	ENSG00000110881
FABP4	-1.47117	0.0150147	ENSG00000170323
EDA	-0.755525	0.0150254	ENSG00000158813
SIM2	0.612003	0.0150605	ENSG00000159263
TAP1	-0.650446	0.0150605	ENSG00000206297
TAP1	-0.650446	0.0150605	ENSG00000226173
C19orf38	-0.84952	0.0151841	ENSG00000214212
PGPEP1	-0.635709	0.0151905	ENSG00000130517
RAB39B	1.01419	0.0152621	ENSG00000155961
NDNF	0.71394	0.0152768	ENSG00000173376
PROX2	1.42669	0.0153092	ENSG00000119608
YPEL1	-0.776275	0.0153112	ENSG00000100027
HSD17B11	-0.885075	0.0153214	ENSG00000198189
GPR179	-1.32269	0.015342	ENSG00000277399
CASC10	0.669205	0.0153554	ENSG00000204682
ZNF391	0.598674	0.0154135	ENSG00000124613
CCDC3	0.800025	0.0154695	ENSG00000151468
SAMD12	-1.06302	0.0155915	ENSG00000177570
CYP39A1	0.749497	0.0156082	ENSG00000146233
SLCO2A1	-1.18114	0.0156423	ENSG00000174640
WFDC1	0.919244	0.0156599	ENSG00000103175
CAPN6	1.07572	0.015716	ENSG00000077274
AXIN2	0.659318	0.015716	ENSG00000168646
ASIC4	-1.20171	0.0158334	ENSG00000072182
ALOX12	-1.2288	0.015858	ENSG00000108839
SCN1A	1.59817	0.015882	ENSG00000144285
FBXO43	-1.06776	0.0158844	ENSG00000156509
MNS1	-0.589958	0.0159115	ENSG00000138587
MAPK15	1.41199	0.0159318	ENSG00000181085
SLC25A25	-0.608457	0.0159806	ENSG00000148339
RAB11FIP4	0.665078	0.0160086	ENSG00000131242
ACSM3	-0.642053	0.0160116	ENSG00000005187
ASPA	0.739297	0.0160886	ENSG00000108381
RAET1K	1.41783	0.0160995	ENSG00000218358
MGST2	-0.668495	0.0161059	ENSG00000085871
PVRIG2P	-1.49857	0.0161665	ENSG00000235333
RP5-875O13.7	1.085	0.0161817	ENSG00000280114
KIF5A	1.14056	0.0162639	ENSG00000155980
FAIM2	0.92718	0.016322	ENSG00000135472
CENPN	-0.73992	0.0163934	ENSG00000166451
CDCA8	-0.933009	0.0164418	ENSG00000134690
SOST	1.53903	0.016447	ENSG00000167941
SEMA3A	0.694162	0.0164567	ENSG00000075213
PARP15	0.781093	0.0164567	ENSG00000173200
RP11-45M22.4	-1.43651	0.0165845	ENSG00000264187
ALPL	1.36646	0.0166214	ENSG00000162551
ADHFE1	-0.720683	0.0166359	ENSG00000147576
PTGES	0.901486	0.0166359	ENSG00000148344
NUTM2HP	-1.19294	0.0166961	ENSG00000232706
TCF7	-0.807642	0.0167571	ENSG00000081059
JUN	-0.810384	0.0168002	ENSG00000177606
GAL3ST1	-0.817614	0.0168614	ENSG00000128242
SLC43A2	-0.981019	0.0169214	ENSG00000167703
MOB3B	-0.762979	0.016983	ENSG00000120162
CITED4	-0.729439	0.0170734	ENSG00000179862
TOM1L1	-0.696118	0.0170858	ENSG00000141198
ALPK2	-1.34346	0.0170858	ENSG00000198796
PLA2G10	-1.41655	0.0171069	ENSG00000276870
STAC2	-0.791603	0.0171455	ENSG00000141750
MUSTN1	-1.1169	0.0171906	ENSG00000272573
CCDC136	0.633788	0.0172889	ENSG00000128596
ZNF469	0.678554	0.0173112	ENSG00000225614
MDH1B	0.679139	0.0174004	ENSG00000138400
WI2-2994D6.1	-1.47566	0.0176578	ENSG00000277862
ST8SIA6	1.36379	0.017666	ENSG00000148488
AOC2	0.854829	0.0177769	ENSG00000131480
PRSS35	0.79973	0.0177769	ENSG00000146250
ST6GALNAC5	1.02155	0.0179507	ENSG00000117069
TET1	0.6383	0.0180111	ENSG00000138336
VAT1L	1.08056	0.0180182	ENSG00000171724
SSX2IP	0.63351	0.0181721	ENSG00000117155
FCRL6	-1.27605	0.0182362	ENSG00000181036
C2orf70	-0.892974	0.0182956	ENSG00000173557
APCDD1	0.755456	0.0184219	ENSG00000154856
BDH1	-0.614862	0.0185637	ENSG00000161267
NELL1	1.28755	0.0186049	ENSG00000165973
THBS1	0.806164	0.018612	ENSG00000137801
FOXA2	-0.87006	0.0186651	ENSG00000125798
ADH1C	-1.33261	0.0186651	ENSG00000248144
NECAB3	-0.601454	0.0186801	ENSG00000125967
RBP7	-1.36256	0.0187056	ENSG00000162444
HMGN1P13	1.17796	0.01879	ENSG00000249619
CPO	0.91625	0.0188477	ENSG00000144410
NKTR	0.616154	0.0188517	ENSG00000114857
LRRC3C	-1.12191	0.0189508	ENSG00000204913
KCNK3	-1.0058	0.0189934	ENSG00000171303
GREM2	1.17305	0.0191232	ENSG00000180875
KIAA0101	-1.03424	0.0191801	ENSG00000166803
NAPEPLD	0.669877	0.019295	ENSG00000161048
SUSD4	1.01714	0.0193151	ENSG00000143502
KDM7A	-0.600231	0.0193539	ENSG00000006459
IGLON5	0.929689	0.0196333	ENSG00000142549
IFIT1	0.637722	0.0196333	ENSG00000185745
SNPH	0.613201	0.0197045	ENSG00000101298
ACSS3	-0.652387	0.0197419	ENSG00000111058
FLT1	0.659068	0.0197576	ENSG00000102755
PI4KAP2	-0.62869	0.0197576	ENSG00000183506
ARHGAP19	-0.590707	0.0200141	ENSG00000213390
NRG2	-0.602263	0.0200484	ENSG00000158458
CES4A	0.759777	0.0200585	ENSG00000172824
MAD2L1	-0.647009	0.0202872	ENSG00000164109
CENPI	-1.14039	0.0203904	ENSG00000102384
ZNRF2P1	-0.834347	0.0205788	ENSG00000237004
ANXA8L1	1.19363	0.0207703	ENSG00000264230
PDGFRB	-0.619208	0.0208093	ENSG00000113721
FAM221B	-1.25097	0.0208942	ENSG00000204930
METRNL	-0.84098	0.0211214	ENSG00000275031
RALGAPA2	-0.685116	0.0211711	ENSG00000188559
RP11-339B21.8	0.756022	0.0212685	ENSG00000228510
NLGN3	0.761292	0.021287	ENSG00000196338
TONSL	-0.741869	0.0213057	ENSG00000160949
DCHS2	0.914813	0.0213057	ENSG00000197410
RP11-212D19.4	-1.37428	0.0213057	ENSG00000255663
RACGAP1	-0.610223	0.0213419	ENSG00000161800
NPAS2	-0.687598	0.0214379	ENSG00000170485
PHKG1	0.587818	0.0214412	ENSG00000164776
COL13A1	0.885488	0.0214455	ENSG00000197467
FCGR3B	-1.53426	0.0215253	ENSG00000162747
KIAA1244	0.947365	0.0217736	ENSG00000112379
HIST2H2AA4	-1.0332	0.0218016	ENSG00000272196
IGSF9B	0.71032	0.021824	ENSG00000080854
THSD4	0.755802	0.0218562	ENSG00000187720
RP11-77K12.7	1.18952	0.0219096	ENSG00000260092
ACBD7	-0.989319	0.0219331	ENSG00000176244
FLT4	-1.22049	0.0221233	ENSG00000037280
LFNG	0.86842	0.0221748	ENSG00000106003
ABCA10	0.731098	0.022284	ENSG00000154263
LMTK3	0.955275	0.022291	ENSG00000142235
CYP2C8	1.42946	0.0223305	ENSG00000138115
KCNH3	0.85206	0.0223675	ENSG00000135519
C4A	1.36512	0.022469	ENSG00000206340
TICAM2	0.719383	0.0227322	ENSG00000243414
INMT	0.837519	0.0227352	ENSG00000241644
IFNE	1.38123	0.0227858	ENSG00000184995
HCRTR2	1.34616	0.022843	ENSG00000137252
GABRE	-1.04691	0.0228627	ENSG00000102287
CDC42BPG	-1.408	0.0228627	ENSG00000171219
HAP1	-1.3128	0.0228627	ENSG00000173805
DTX2P1	-0.632003	0.0228693	ENSG00000186704
AJAP1	1.34466	0.0228693	ENSG00000196581
SHISA3	-0.885498	0.0228893	ENSG00000178343
CYP26A1	-1.20168	0.0229194	ENSG00000095596
NRXN2	0.77267	0.0229194	ENSG00000110076
PTTG1	-0.715757	0.0229869	ENSG00000164611
SLC25A37	-0.667133	0.0230363	ENSG00000147454
TICRR	-1.26946	0.0231017	ENSG00000140534
SAP25	-0.924412	0.02317	ENSG00000205307
HIST1H3H	-1.01534	0.023299	ENSG00000278828
CD79B	-0.706376	0.0233448	ENSG00000007312
MORF4L1P1	1.25828	0.0233448	ENSG00000218283
CHST2	0.745122	0.0235546	ENSG00000175040
ISG20	-0.620543	0.0237478	ENSG00000172183
LENG8	-1.09171	0.0237517	ENSG00000276681
bP-2189O9.2	1.43994	0.0237677	ENSG00000278931
AL672183.2	-1.20454	0.0238551	ENSG00000233084
COL16A1	0.594784	0.0238557	ENSG00000084636
METTL7B	-1.44341	0.0238557	ENSG00000170439
AARD	-1.143	0.0238557	ENSG00000205002
P4HA3	0.877709	0.0239679	ENSG00000149380
TSPAN13	0.785884	0.024033	ENSG00000106537
NXPH4	0.748721	0.0241188	ENSG00000182379
LGALS12	-1.08213	0.024123	ENSG00000133317
PPP1R36	0.667791	0.0241491	ENSG00000165807
CDKN2A	-0.824518	0.0242064	ENSG00000147889
NR4A3	-0.818717	0.0242913	ENSG00000119508
SIX3	1.15335	0.0243734	ENSG00000138083
COL26A1	0.865892	0.0243916	ENSG00000160963
CCDC71L	-0.688667	0.0244358	ENSG00000253276
TMEM56-RWDD3	0.932299	0.024504	ENSG00000271092
NANOS1	0.840648	0.0246231	ENSG00000188613
CBX3P9	1.48654	0.0246429	ENSG00000217241
RPS6KA6	0.585132	0.0247398	ENSG00000072133
PDZRN4	-1.153	0.0247502	ENSG00000165966
CYB5R4	-0.616039	0.0247598	ENSG00000065615
CTNNA2	1.226	0.0247652	ENSG00000066032
ASIC2	-1.17676	0.0248529	ENSG00000108684
ADORA2B	0.68265	0.0248578	ENSG00000170425
COCH	0.993619	0.024863	ENSG00000100473
RGS11	0.935858	0.0248641	ENSG00000076344
BMP3	-1.23062	0.024893	ENSG00000152785
GRIK1	1.30034	0.0249154	ENSG00000171189
ZNF93	-0.814083	0.0249754	ENSG00000184635
EPDR1	0.784637	0.025	ENSG00000086289
HEY1	0.807674	0.0250107	ENSG00000164683
PBX2	1.23399	0.025033	ENSG00000236353
RARB	0.625505	0.0252409	ENSG00000077092
TNFSF13B	-0.852687	0.0253282	ENSG00000102524
KB-226F1.4	-1.0576	0.0253282	ENSG00000277507
HLA-DOA	-1.40991	0.0254804	ENSG00000232957
CYP27B1	0.876223	0.0254965	ENSG00000111012
PCSK1N	1.02746	0.0255818	ENSG00000102109
MCF2L2	0.727077	0.0255873	ENSG00000053524
PDZD4	0.809065	0.025595	ENSG00000067840
ASF1B	-0.983114	0.0258965	ENSG00000105011
RP11-173M11.2	-0.923439	0.0259491	ENSG00000250327
FGFBP2	0.660413	0.0259631	ENSG00000137441
MEI4	1.15147	0.0260665	ENSG00000269964
MICB	-1.02897	0.0261386	ENSG00000204516
MICB	-1.02897	0.0261386	ENSG00000231179
PRAMEF14	-1.4229	0.0261508	ENSG00000204481
CYP4F11	-1.13439	0.0261593	ENSG00000171903
TBC1D2	-0.703939	0.0261672	ENSG00000095383
PLAC1	1.45234	0.026304	ENSG00000170965
TFCP2L1	-0.917257	0.0263334	ENSG00000115112
DND1P1	-1.11794	0.0264976	ENSG00000264070
NHLRC1	0.667315	0.0266337	ENSG00000187566
PRKG1	0.695354	0.026636	ENSG00000185532
AQP1	1.04396	0.0266614	ENSG00000240583
CCDC154	-1.01161	0.0268001	ENSG00000197599
DDN	-1.34717	0.0270138	ENSG00000181418
RP1-95L4.4	0.587177	0.027046	ENSG00000217648
SOGA3	-0.962473	0.0271325	ENSG00000214338
[truncated: 693 more rows]
