# Supplementary material for: Stratification of knee osteoarthritis: two major patient subgroups identified by genome-wide expression analysis of articular cartilage
Source: Ann Rheum Dis. 2017 Dec 22;77(3):423. doi: 10.1136/annrheumdis-2017-212603 (PMC5867416; doi:10.1136/annrheumdis-2017-212603)
Supplement: Supplementary file 4 [file annrheumdis-2017-212603supp004.xlsx]

## Sheet: DiffExpAll
Ensembl_ID	gene_name	log2FoldChangeAvsnonOA	padjAvsnonOA	log2FoldChangeBvsnonOA	padjBvsnonOA	log2FoldChangeBvsA	padjBvsA	counts.nonOA	counts.groupA	counts.groupB
ENSG00000112562	SMOC2	2.71258	8.62615e-33	2.16504	2.89236e-20	-0.547539	0.00474742	6048.32	50965.8	35252.1
ENSG00000170961	HAS2	2.32023	1.07594e-31	2.18371	8.29679e-27	-0.136525	0.495469	64.2374	470.903	404.414
ENSG00000113578	FGF1	2.49174	1.98971e-31	2.1485	2.71476e-22	-0.343232	0.0770505	582.862	4438.11	3352.55
ENSG00000168209	DDIT4	-2.95489	7.4014e-28	-3.20479	5.24583e-31	-0.249907	0.379132	33555.3	3154.79	2890.02
ENSG00000116717	GADD45A	-2.20758	3.82885e-27	-2.11817	6.33136e-24	0.0894117	0.706555	2515.33	452.6	528.334
ENSG00000265972	TXNIP	-2.18444	1.31005e-26	-2.37049	7.67268e-30	-0.186049	0.367077	51329.9	10099.3	9480.31
ENSG00000181938	GINS3	1.56852	3.45129e-26	1.2863	4.59546e-17	-0.282228	0.0164327	65.7656	197.22	155.482
ENSG00000135821	GLUL	-2.52867	4.27539e-26	-2.04264	1.44071e-16	0.486031	0.0217556	28536.4	3580.65	5069.21
ENSG00000165572	KBTBD6	1.19782	1.75891e-25	1.11253	4.77885e-21	-0.0852973	0.432067	123.667	328.784	311.469
ENSG00000147872	PLIN2	-1.27684	2.24578e-25	-1.1241	7.99179e-19	0.15274	0.177623	1055.95	431.664	468.258
ENSG00000196954	CASP4	-1.96743	2.72465e-24	-1.03997	4.15041e-07	0.927464	7.20418e-10	982.373	250.369	482.858
ENSG00000137054	POLR1E	-1.22128	4.25775e-24	-1.3155	2.24585e-26	-0.0942231	0.442133	676.364	290.835	275.594
ENSG00000168003	SLC3A2	-1.19091	1.00764e-23	-1.26918	1.63853e-25	-0.0782755	0.524722	2153.38	989.302	943.945
ENSG00000119669	IRF2BPL	-1.14263	7.7031e-23	-1.03965	3.34944e-18	0.102982	0.366043	1429.35	541.421	603.686
ENSG00000244242	IFITM10	2.08189	7.18194e-22	1.49472	2.79317e-11	-0.58717	0.000986382	748.882	2694.83	2064.67
ENSG00000102359	SRPX2	1.67226	1.59512e-21	1.6007	6.28832e-19	-0.0715605	0.721446	1319.7	4491.42	4144.65
ENSG00000099860	GADD45B	-2.50741	2.23366e-20	-2.63381	1.54937e-21	-0.126396	0.691844	11720	1165.4	1255.29
ENSG00000188487	INSC	2.42121	9.69152e-20	2.0098	1.67198e-13	-0.411413	0.0914957	87.0817	636.001	429.295
ENSG00000196562	SULF2	1.20559	1.06354e-19	0.867757	2.71306e-10	-0.337836	0.00144231	7461.55	17875	14354.9
ENSG00000173221	GLRX	-2.49648	1.46443e-19	-2.54259	1.53663e-19	-0.0461105	0.902719	5017.1	745.871	667.437
ENSG00000281618	IFITM10	1.9911	1.51732e-19	1.46755	1.06433e-10	-0.523551	0.00327693	60.7468	260.11	199.542
ENSG00000180198	RCC1	-1.29833	3.53246e-19	-1.29756	1.84029e-18	0.000775625	0.996754	1073.88	413.331	438.4
ENSG00000136938	ANP32B	-0.998774	5.25358e-19	-0.983193	9.06562e-18	0.0155806	0.914246	3412.5	1816.95	1849.97
ENSG00000089157	RPLP0	-1.02514	6.03128e-19	-1.08234	3.38013e-20	-0.0571956	0.646123	51058.1	24462.6	24307.7
ENSG00000178035	IMPDH2	-0.794365	9.61738e-19	-0.935934	1.07456e-24	-0.141569	0.0664867	3669.07	2190.83	2009.99
ENSG00000119138	KLF9	-1.71997	1.54387e-18	-1.54497	1.03308e-14	0.175002	0.367141	5680.73	1680.39	2134.75
ENSG00000188488	SERPINA5	2.12197	3.00593e-18	1.81565	3.19671e-13	-0.306324	0.185615	4588.75	26428.3	18136.6
ENSG00000107372	ZFAND5	-1.65566	3.2268e-18	-1.96405	2.19604e-24	-0.308392	0.0648263	9781.08	2913.82	2546.16
ENSG00000243056	EIF4EBP3	-1.78956	5.81768e-18	-1.64528	6.00257e-15	0.144282	0.513101	241.129	60.0886	66.4552
ENSG00000175197	DDIT3	-1.37913	7.78496e-18	-1.44588	8.80193e-19	-0.06675	0.712937	752.983	283.213	260.982
ENSG00000100353	EIF3D	-0.864728	1.17716e-17	-0.918653	4.45279e-19	-0.0539249	0.613841	4672.49	2537.46	2463.45
ENSG00000115526	CHST10	1.62014	1.25017e-17	1.17914	1.86825e-09	-0.440997	0.00446753	453.717	1605	1175.16
ENSG00000090621	PABPC4	-0.954724	1.32691e-17	-1.10753	2.05461e-22	-0.152808	0.121985	3117.34	1647.36	1533.71
ENSG00000155893	PXYLP1	1.64302	1.52875e-17	1.57011	1.18359e-15	-0.0729119	0.742906	1118.31	3963.94	3534.42
ENSG00000169100	SLC25A6	-0.95341	2.11746e-17	-0.953439	8.19736e-17	-2.87732e-05	0.999792	8177.37	3893.95	3838.38
ENSG00000086544	ITPKC	-1.59047	2.93244e-17	-1.85471	2.9544e-22	-0.264233	0.120501	1747.49	506.958	404.265
ENSG00000152952	PLOD2	1.25002	4.96162e-17	1.14619	4.66182e-14	-0.103827	0.491404	5025.76	15506.6	14149.3
ENSG00000165507	C10orf10	-2.29477	6.33178e-17	-2.46196	9.66591e-19	-0.167184	0.586246	17761.8	2560.98	2304.45
ENSG00000205364	MT1M	-2.42344	1.0884e-16	-2.75144	1.37751e-20	-0.328008	0.266075	4603.18	564.019	522.707
ENSG00000183196	CHST6	1.4364	1.22644e-16	1.3846	4.0384e-15	-0.0517941	0.796917	844.332	2608.31	2450.34
ENSG00000136859	ANGPTL2	1.72909	1.34967e-16	1.62075	2.60125e-14	-0.108343	0.639172	17132.2	63951.6	59502.6
ENSG00000130513	GDF15	-2.55417	1.47791e-16	-1.74625	4.41338e-08	0.807922	0.00392071	100.111	11.6052	21.8771
ENSG00000196371	FUT4	1.0073	1.95337e-16	0.78597	4.77341e-10	-0.221329	0.028664	428.075	912.345	800.304
ENSG00000132589	FLOT2	-1.10597	3.12507e-16	-1.13454	1.66527e-16	-0.0285709	0.863885	1869.06	731.563	728.869
ENSG00000189221	MAOA	-2.63164	3.12507e-16	-1.76327	1.37814e-07	0.868368	0.00254883	443.985	61.4459	92.6974
ENSG00000082497	SERTAD4	1.87419	3.60973e-16	1.62456	4.87857e-12	-0.24963	0.259068	540.87	2078.86	1740.01
ENSG00000281230	SERTAD4	1.87419	3.60973e-16	1.62456	4.87857e-12	-0.24963	0.259068	540.87	2078.86	1740.01
ENSG00000221869	CEBPD	-1.63682	7.0945e-16	-1.76947	8.13623e-18	-0.13265	0.532598	9667.02	2261.07	2202.86
ENSG00000240024	LINC00888	1.09735	7.54793e-16	0.796374	1.71056e-08	-0.300974	0.00480072	159.491	377.282	311.726
ENSG00000187193	MT1X	-1.94721	9.51208e-16	-2.5513	1.50905e-25	-0.604088	0.00286397	55178.6	13391.2	9824.38
ENSG00000070756	PABPC1	-0.962439	1.11672e-15	-0.904238	1.49041e-13	0.0582014	0.652767	12474	5941.29	6296.33
ENSG00000011201	KAL1	2.02201	1.53549e-15	1.99447	8.31205e-15	-0.0275376	0.936981	679.956	3593.31	3841.5
ENSG00000134686	PHC2	-1.71269	1.78765e-15	-1.7246	2.64051e-15	-0.011909	0.967792	5881.4	1183.48	1113.64
ENSG00000275932	DUSP14	1.63518	2.0098e-15	1.48896	1.27178e-12	-0.146221	0.484079	172.468	565.216	477.018
ENSG00000181163	NPM1	-0.962911	2.10938e-15	-1.10655	2.26644e-19	-0.143638	0.190409	20668.3	11739.7	10632.3
ENSG00000099260	PALMD	1.13082	2.46531e-15	1.17513	4.75845e-16	0.0443077	0.785282	882.636	1976.88	1930.8
ENSG00000167202	TBC1D2B	-0.994543	2.46531e-15	-0.986663	1.01642e-14	0.00788059	0.962444	2094.87	950.275	955.637
ENSG00000136732	GYPC	-1.16917	2.47699e-15	-0.833345	5.68313e-08	0.335827	0.0051257	1291	494.566	624.939
ENSG00000197892	KIF13B	1.25253	2.80142e-15	1.15617	8.50086e-13	-0.096361	0.559267	1606.66	3685.64	3620.48
ENSG00000107341	UBE2R2	-0.934484	3.47807e-15	-1.05742	1.59089e-18	-0.122932	0.266342	1375.37	762.232	695.098
ENSG00000125148	MT2A	-2.25942	3.47807e-15	-2.73863	3.45386e-21	-0.479217	0.0708226	101317	10738.4	9371.28
ENSG00000134198	TSPAN2	1.88868	4.2066e-15	2.04289	5.39504e-17	0.15421	0.549962	836.252	3530.19	3965.17
ENSG00000115884	SDC1	1.92734	4.61163e-15	1.69153	1.67796e-11	-0.235804	0.335408	833.643	3582.08	2957.49
ENSG00000067606	PRKCZ	1.15279	5.59185e-15	0.757221	9.82971e-07	-0.395571	0.000658268	1348.2	3006.2	2357.81
ENSG00000099875	MKNK2	-1.42449	5.83103e-15	-1.49933	4.9528e-16	-0.0748378	0.717166	3259.88	1024.77	985.056
ENSG00000021852	C8B	2.75953	6.72726e-15	2.39374	3.05303e-11	-0.365786	0.299737	2.94761	71.5481	48.6142
ENSG00000275993	CH507-42P11.8	-2.35471	7.16776e-15	-1.88467	1.29605e-09	0.470046	0.104982	621.175	78.9004	114.914
ENSG00000103023	PRSS54	2.28669	7.57899e-15	1.69936	2.4147e-08	-0.587338	0.00358455	3.13201	25.3977	14.3392
ENSG00000169715	MT1E	-2.32213	9.5224e-15	-2.74092	1.48191e-19	-0.418791	0.148969	29829.1	4077.45	3878.15
ENSG00000172216	CEBPB	-1.17875	9.78965e-15	-1.45824	3.03327e-21	-0.279491	0.0291876	3593.94	1513.22	1277.7
ENSG00000122176	FMOD	1.5261	1.04509e-14	1.21173	2.56896e-09	-0.31437	0.0691135	115604	354733	295067
ENSG00000131473	ACLY	1.03631	1.25083e-14	0.985896	5.90203e-13	-0.0504166	0.738601	2117.48	4363.96	4047.7
ENSG00000260916	CCPG1	0.971674	1.35818e-14	0.919776	8.36085e-13	-0.0518985	0.709936	7523.63	16838.4	16051.5
ENSG00000124228	DDX27	-0.608508	1.45674e-14	-0.704353	1.55687e-18	-0.0958454	0.175606	1177.48	741.339	724.622
ENSG00000156076	WIF1	2.52964	1.57812e-14	1.66938	1.24409e-06	-0.860257	0.00337089	229.876	2594.17	1174.73
ENSG00000197894	ADH5	-0.731411	1.57812e-14	-0.693088	9.22612e-13	0.0383232	0.716456	2374.68	1454.93	1397.1
ENSG00000165526	RPUSD4	-0.812955	1.74727e-14	-0.865107	8.81008e-16	-0.0521522	0.65033	460.283	258.609	239.125
ENSG00000166508	MCM7	-0.855746	2.014e-14	-0.877294	1.03308e-14	-0.0215475	0.876353	1104.87	610.42	598.786
ENSG00000112144	ICK	0.730364	2.62015e-14	0.720312	1.39462e-13	-0.0100526	0.93407	464.593	839.67	862.591
ENSG00000140988	RPS2	-1.08232	2.85646e-14	-1.22294	2.24164e-17	-0.140626	0.293806	35784.3	15079.1	13769.7
ENSG00000120659	TNFSF11	2.01594	2.8578e-14	3.01728	6.37512e-30	1.00134	1.59297e-06	75.1857	386.933	836.29
ENSG00000125965	GDF5	1.91275	2.8578e-14	1.62705	2.77165e-10	-0.285704	0.235758	157.918	644.22	553.816
ENSG00000187957	DNER	2.38593	3.7832e-14	2.09771	6.91016e-11	-0.288228	0.387016	64.0603	598.458	457.592
ENSG00000198756	COLGALT2	1.41426	4.29661e-14	0.965418	8.27207e-07	-0.448838	0.00316411	2588.63	7446.65	5589.99
ENSG00000126500	FLRT1	2.64142	5.13789e-14	2.21992	5.65256e-10	-0.421505	0.20283	2.91733	41.2777	25.996
ENSG00000120696	KBTBD7	1.272	5.14021e-14	1.09372	2.61935e-10	-0.178277	0.247989	151.899	428.795	370.989
ENSG00000113272	THG1L	-0.941352	8.3424e-14	-0.880123	7.22981e-12	0.0612283	0.653571	372.736	211.746	210.349
ENSG00000065427	KARS	-0.603718	8.37054e-14	-0.666592	3.795e-16	-0.0628739	0.424145	2447.6	1737.31	1674.58
ENSG00000125864	BFSP1	1.75218	8.47971e-14	1.98121	6.59541e-17	0.229033	0.312856	105.452	381.11	437.421
ENSG00000136842	TMOD1	-2.15482	9.69558e-14	-1.66117	2.66748e-08	0.493655	0.063853	1736.03	271.202	406.762
ENSG00000149633	KIAA1755	1.6679	1.09689e-13	1.26021	5.96698e-08	-0.407685	0.0355637	514.423	1415.22	1065.07
ENSG00000117614	SYF2	-0.866727	1.11417e-13	-0.908023	1.48641e-14	-0.0412952	0.754094	1858.76	1063.58	1082.3
ENSG00000055070	SZRD1	-0.508982	1.1669e-13	-0.458959	5.82838e-11	0.0500229	0.45755	2545.26	1644.02	1727.04
ENSG00000250510	GPR162	-1.75619	1.22345e-13	-1.82036	3.27644e-14	-0.0641667	0.828289	150.054	33.5526	33.7373
ENSG00000166750	SLFN5	-1.44653	1.38715e-13	-0.582059	0.00731058	0.864469	6.31809e-09	518.373	192.599	343.362
ENSG00000028137	TNFRSF1B	-2.1376	1.47564e-13	-1.14083	0.000225132	0.996772	3.21458e-05	365.938	56.5337	117.613
ENSG00000144567	FAM134A	-0.588534	1.47564e-13	-0.657552	3.55692e-16	-0.0690181	0.364389	1919.24	1276.43	1194.34
ENSG00000105640	RPL18A	-1.03126	1.72015e-13	-1.22004	6.58937e-18	-0.188775	0.125999	22125.5	10601.4	9247.58
ENSG00000065911	MTHFD2	-1.45051	1.91495e-13	-1.41567	1.62748e-12	0.0348471	0.889731	1644.94	673.987	619.8
ENSG00000092068	SLC7A8	-1.28201	1.99049e-13	-1.42636	5.66142e-16	-0.144349	0.401499	2347.79	784.973	717.733
ENSG00000148303	RPL7A	-0.793146	2.15104e-13	-0.927856	2.14856e-17	-0.13471	0.160649	16354.6	9568.28	8596.32
ENSG00000280858	RPL7A	-0.793146	2.15104e-13	-0.927856	2.14856e-17	-0.13471	0.160649	16354.6	9568.28	8596.32
ENSG00000132031	MATN3	2.19307	2.15757e-13	1.74965	1.32203e-08	-0.443421	0.118437	799.999	5488.42	3853.37
ENSG00000138615	CILP	1.95944	2.15757e-13	1.61175	4.37273e-09	-0.347695	0.17002	76721.1	364630	297337
ENSG00000215021	PHB2	-0.669551	2.38443e-13	-0.800887	4.5214e-18	-0.131336	0.0959419	3107.37	1978.14	1800.01
ENSG00000136942	RPL35	-1.03667	2.58656e-13	-1.15358	7.79315e-16	-0.116915	0.397054	14501	7024.17	6435.08
ENSG00000105372	RPS19	-0.904379	2.74085e-13	-1.03671	1.20238e-16	-0.132335	0.245406	14018.7	8100.42	6864.29
ENSG00000151914	DST	0.832328	2.74085e-13	0.748712	1.29095e-10	-0.0836161	0.456182	8482.52	14364.9	14263
ENSG00000136869	TLR4	-1.58963	2.92719e-13	-0.768247	0.00115016	0.821383	1.26172e-06	528.484	183.852	335.752
ENSG00000130255	RPL36	-1.09665	3.29634e-13	-1.37121	1.9227e-19	-0.274555	0.0295915	12576.6	5982.26	4901.76
ENSG00000184428	TOP1MT	-1.05642	3.29634e-13	-1.19645	3.64835e-16	-0.140031	0.312365	485.355	213.672	197.91
ENSG00000004799	PDK4	-2.30294	3.36279e-13	-2.53675	1.72017e-15	-0.233811	0.505403	6527.96	759.124	722.6
ENSG00000162244	RPL29	-0.916738	3.69436e-13	-1.03056	6.12772e-16	-0.113822	0.343133	16600	9289.3	8340.73
ENSG00000083845	RPS5	-0.985826	4.21872e-13	-1.19917	2.55042e-18	-0.213341	0.0668443	15646.2	8003.24	6627.7
ENSG00000144713	RPL32	-1.00656	4.3105e-13	-1.16875	8.50746e-17	-0.162187	0.197986	31269.3	16565.5	14887.2
ENSG00000104529	EEF1D	-0.827202	4.35352e-13	-0.985565	1.41498e-17	-0.158363	0.111851	12265.7	6031.62	5444.02
ENSG00000197119	SLC25A29	-1.2936	4.52404e-13	-1.47948	2.78055e-16	-0.185877	0.276894	461.778	148.042	133.333
ENSG00000148730	EIF4EBP2	-0.763973	4.53195e-13	-0.861071	6.75151e-16	-0.0970982	0.330872	3520.1	2116.94	1974.56
ENSG00000177954	RPS27	-1.08162	4.66217e-13	-1.20395	1.56249e-15	-0.122324	0.402402	39292.1	21486.5	19547.6
ENSG00000204628	GNB2L1	-0.690967	4.81559e-13	-0.76273	2.9002e-15	-0.071763	0.443866	18659.3	11599.2	10770.7
ENSG00000166509	CLEC3A	2.43848	5.13468e-13	2.16518	3.26999e-10	-0.273299	0.468323	4548.44	58109.7	36309.4
ENSG00000114737	CISH	-1.70592	5.43345e-13	-2.22998	9.00372e-21	-0.524055	0.00931894	746.184	172.053	130.333
ENSG00000172602	RND1	-2.39538	5.97093e-13	-2.66387	1.98175e-15	-0.268495	0.476376	374.376	30.1908	28.2508
ENSG00000137193	PIM1	-1.78924	6.05705e-13	-1.38106	7.94209e-08	0.408178	0.0681471	568.708	135.22	172.871
ENSG00000135245	HILPDA	-2.1047	6.83538e-13	-2.26852	1.72092e-14	-0.163811	0.625911	5973.62	872.812	813.722
ENSG00000196968	FUT11	0.76139	6.83538e-13	0.708549	5.92978e-11	-0.0528409	0.634951	631.636	1192.76	1148.66
ENSG00000162191	UBXN1	-0.937683	7.16336e-13	-0.90391	1.12187e-11	0.0337733	0.825183	1875.68	854.609	910.598
ENSG00000221983	UBA52	-0.81425	7.16336e-13	-0.900524	4.07451e-15	-0.086274	0.438156	9710.5	6015.01	5541.77
ENSG00000205213	LGR4	0.919764	7.79985e-13	0.87353	2.52142e-11	-0.0462344	0.746289	561.203	1156.57	1127.85
ENSG00000171490	RSL1D1	-0.940953	7.82227e-13	-0.983599	1.60306e-13	-0.0426467	0.774982	4228.84	2302.45	2345.15
ENSG00000163884	KLF15	-1.56557	8.10551e-13	-2.11701	7.74389e-22	-0.551436	0.00210957	2288.3	646.804	447.092
ENSG00000163719	MTMR14	-0.613996	8.58775e-13	-0.601655	6.40922e-12	0.0123417	0.910295	398.58	254.909	256.156
ENSG00000185215	TNFAIP2	-1.3947	9.55259e-13	-0.738548	0.000448406	0.656154	1.60491e-05	890.407	309.369	507.973
ENSG00000189058	APOD	-2.27485	1.04199e-12	-2.75688	1.01431e-17	-0.482031	0.118681	118159	11830.5	8190.94
ENSG00000148908	RGS10	-1.20374	1.07631e-12	-0.945138	6.70546e-08	0.258606	0.0791682	994.148	478.148	574.482
ENSG00000167244	IGF2	1.88238	1.11208e-12	1.58997	5.05289e-09	-0.292415	0.257769	1175.4	6702.91	5550.17
ENSG00000132801	ZSWIM3	1.17046	1.16373e-12	1.14459	8.84368e-12	-0.0258703	0.888546	27.6646	63.6707	57.6271
ENSG00000108298	RPL19	-0.894895	1.35778e-12	-1.07319	4.1632e-17	-0.178296	0.104945	36471	20721.9	18140.4
ENSG00000116251	RPL22	-0.850099	1.35778e-12	-0.960672	2.14909e-15	-0.110573	0.329969	15471.1	9289.81	8894.51
ENSG00000125347	IRF1	-1.79661	1.36795e-12	-1.19582	6.96982e-06	0.600798	0.00520883	467.11	97.8215	157.022
ENSG00000164764	SBSPON	1.87029	1.36986e-12	1.54589	1.30256e-08	-0.3244	0.196671	277.524	1500.14	1351.39
ENSG00000096150	RPS18	-1.00856	1.52631e-12	-1.17107	4.17096e-16	-0.162511	0.211654	7169.68	4071.88	3578.38
ENSG00000075426	FOSL2	-1.35793	1.54558e-12	-1.35877	3.56912e-12	-0.0008368	0.99758	5129.73	1679.13	1746.76
ENSG00000124614	RPS10	-0.927719	1.54558e-12	-1.09178	1.86782e-16	-0.16406	0.161222	15621.5	8753.19	7580.67
ENSG00000223367	RPS18	-1.00672	1.54558e-12	-1.17168	3.8045e-16	-0.164962	0.202852	7216.13	4102.08	3601.04
ENSG00000226225	RPS18	-1.00672	1.54558e-12	-1.17168	3.8045e-16	-0.164962	0.202852	7216.13	4102.08	3601.04
ENSG00000231500	RPS18	-1.00672	1.54558e-12	-1.17168	3.8045e-16	-0.164962	0.202852	7216.13	4102.08	3601.04
ENSG00000235650	RPS18	-1.00672	1.54558e-12	-1.17168	3.8045e-16	-0.164962	0.202852	7216.13	4102.08	3601.04
ENSG00000161016	RPL8	-0.945425	1.59443e-12	-1.08786	8.29371e-16	-0.14243	0.248785	31795.9	16277	15404.9
ENSG00000115944	COX7A2L	-0.762801	1.63586e-12	-0.825409	4.66182e-14	-0.0626081	0.575518	1766.06	1181.19	1125.98
ENSG00000149294	NCAM1	2.02872	1.70591e-12	1.9572	2.21165e-11	-0.0715165	0.843023	57.3204	364.832	328.889
ENSG00000068323	TFE3	-0.580399	1.87301e-12	-0.548707	7.02187e-11	0.0316919	0.728465	1548.32	943.345	985.351
ENSG00000213190	MLLT11	0.811067	2.03673e-12	0.724467	8.58306e-10	-0.0865995	0.423062	158.432	313.604	310.801
ENSG00000187837	HIST1H1C	-1.74828	2.13373e-12	-2.27076	1.53663e-19	-0.522478	0.0152143	802.024	232.592	150.051
ENSG00000145741	BTF3	-0.730559	2.13749e-12	-0.772502	2.5601e-13	-0.0419424	0.71419	8925.12	5703.65	5751.45
ENSG00000197958	RPL12	-0.884673	2.27126e-12	-1.07468	3.53353e-17	-0.190009	0.0797805	32282.9	18640.9	16635.1
ENSG00000084623	EIF3I	-0.672906	2.60145e-12	-0.79733	2.42979e-16	-0.124424	0.141627	2747.36	1793.79	1637.63
ENSG00000168028	RPSA	-0.90522	2.60145e-12	-0.905376	6.12762e-12	-0.00015636	0.999269	17213.7	9037.59	8884.67
ENSG00000175390	EIF3F	-0.706182	2.60145e-12	-0.73501	7.79008e-13	-0.0288281	0.80261	1008.16	645.23	614.364
ENSG00000280606	EIF3F	-0.706182	2.60145e-12	-0.73501	7.79008e-13	-0.0288281	0.80261	1008.16	645.23	614.364
ENSG00000172809	RPL38	-0.944359	3.17024e-12	-1.09787	9.88964e-16	-0.153509	0.21376	8612.06	4891.29	4364.09
ENSG00000122705	CLTA	-0.662354	3.5005e-12	-0.583768	2.40939e-09	0.078586	0.391032	1900.96	1265.21	1297.89
ENSG00000133321	RARRES3	-1.50464	3.50307e-12	-1.39379	2.89631e-10	0.110852	0.644892	329.545	111.854	119.515
ENSG00000156804	FBXO32	-1.32589	3.6251e-12	-1.10098	2.18092e-08	0.224906	0.204612	417.259	152.985	185.479
ENSG00000115318	LOXL3	1.75914	3.67317e-12	1.69857	4.46006e-11	-0.0605636	0.848609	727.492	3019.83	2764.75
ENSG00000049541	RFC2	-0.742311	3.70175e-12	-0.719211	4.1383e-11	0.0230997	0.858111	417.35	251.297	253.668
ENSG00000149273	RPS3	-0.881911	3.79365e-12	-1.06513	9.95743e-17	-0.183216	0.0959121	30521.7	18210.8	15550.5
ENSG00000243509	TNFRSF6B	-2.29937	3.81849e-12	-1.64244	1.83598e-06	0.65693	0.0356342	281.631	20.1814	35.485
ENSG00000169231	THBS3	1.54212	3.82695e-12	1.88398	4.47358e-17	0.341857	0.0835518	1164.06	3530.23	4046.35
ENSG00000145592	RPL37	-0.998754	3.97768e-12	-1.12049	1.36554e-14	-0.121737	0.38259	26562.8	14104.6	12614.2
ENSG00000122778	KIAA1549	1.51179	3.99339e-12	1.0646	3.11978e-06	-0.447186	0.0148484	598.941	1699.28	1286.72
ENSG00000109158	GABRA4	1.41257	4.00549e-12	1.07266	4.19431e-07	-0.339903	0.0520357	250.562	723.766	608.083
ENSG00000150347	ARID5B	-1.41331	4.09323e-12	-1.19637	1.25723e-08	0.21694	0.262266	1672.2	583.878	716.277
ENSG00000153898	MCOLN2	1.21527	4.10497e-12	0.841595	4.8346e-06	-0.373679	0.00889826	300.801	726.307	521.73
ENSG00000112096	SOD2	-2.09708	4.54736e-12	-2.12248	5.20885e-12	-0.0254026	0.953202	63109.4	12827.4	12541.6
ENSG00000115902	SLC1A4	1.03381	4.59041e-12	0.647737	4.48697e-05	-0.386069	0.00106527	3103.75	6298.98	4888.42
ENSG00000130159	ECSIT	-0.881937	4.88179e-12	-0.870707	2.28296e-11	0.0112306	0.947358	529.154	267.434	273.327
ENSG00000229117	RPL41	-0.86141	4.89856e-12	-1.05156	6.99442e-17	-0.190146	0.0752086	59307.5	34189.1	30039.4
ENSG00000149806	FAU	-0.874797	5.29808e-12	-1.05219	2.24445e-16	-0.177389	0.109205	8965.16	4866.53	4213.76
ENSG00000176046	NUPR1	-0.937429	5.40799e-12	-1.11828	3.8045e-16	-0.180856	0.131913	4930.6	2244.57	1955.66
ENSG00000139597	N4BP2L1	-1.16846	5.89496e-12	-1.31851	1.53324e-14	-0.150041	0.364907	665.184	276.352	258.383
ENSG00000130811	EIF3G	-0.733123	5.99729e-12	-0.681185	4.21517e-10	0.0519384	0.648076	2835.12	1543.5	1621.51
ENSG00000185262	UBALD2	-1.22843	6.11457e-12	-1.3434	1.1715e-13	-0.114973	0.534292	1287.62	354.908	359.972
ENSG00000115758	ODC1	-1.02592	6.34614e-12	-1.1485	2.87396e-14	-0.122583	0.401196	1723.89	873.243	830.231
ENSG00000164104	HMGB2	-1.21652	6.37647e-12	-1.45766	3.64835e-16	-0.24114	0.126694	2529.35	1146.57	976.672
ENSG00000105193	RPS16	-0.994555	6.47872e-12	-1.17202	1.06074e-15	-0.177463	0.173046	16275.6	8012.91	6935.52
ENSG00000111328	CDK2AP1	0.941931	6.47872e-12	0.800374	1.56841e-08	-0.141557	0.265063	2066.96	4648.86	4034.24
ENSG00000112761	WISP3	1.16488	6.47872e-12	0.825866	3.43875e-06	-0.339016	0.015698	1165.83	2594.49	2048.43
ENSG00000061273	HDAC7	-1.46164	6.55738e-12	-1.23263	2.01517e-08	0.229007	0.259346	991.475	267.996	328.28
ENSG00000022267	FHL1	1.00809	6.61798e-12	1.0652	9.08505e-13	0.0571152	0.728026	5348.31	10655.8	11483.6
ENSG00000089289	IGBP1	-0.863658	7.19355e-12	-1.02951	5.96684e-16	-0.165857	0.136408	1834.14	1039.49	926.794
ENSG00000278229	RPS17L	-0.919818	7.70685e-12	-0.981297	6.36346e-13	-0.0614787	0.6724	21665.1	12206	12001.6
ENSG00000104723	TUSC3	0.885073	7.78687e-12	0.678577	4.81927e-07	-0.206496	0.059189	1057.63	2116.54	1785.65
ENSG00000099992	TBC1D10A	-0.645602	7.99434e-12	-0.567304	5.52286e-09	0.078298	0.393102	397.474	226.514	234.432
ENSG00000146006	LRRTM2	2.02404	8.02558e-12	1.68621	3.32628e-08	-0.337838	0.242886	40.66	251.623	169.528
ENSG00000167470	MIDN	-1.3363	8.94837e-12	-1.43447	5.19138e-13	-0.0981726	0.647416	1912.27	591.14	554.743
ENSG00000276023	DUSP14	1.64864	8.94837e-12	1.28832	2.85947e-07	-0.36032	0.0934465	83.5416	350.717	256.373
ENSG00000142676	RPL11	-0.902854	9.03674e-12	-1.06331	1.74132e-15	-0.160459	0.176707	34616.7	18311.8	16591.4
ENSG00000059804	SLC2A3	-1.36089	9.0624e-12	-1.18192	8.92143e-09	0.178977	0.360514	1524.28	560.017	630.166
ENSG00000124762	CDKN1A	-1.86402	9.55332e-12	-1.65595	3.75473e-09	0.208069	0.47309	3498.96	679.256	798.221
ENSG00000165632	TAF3	-0.451296	9.55332e-12	-0.446629	3.52062e-11	0.00466745	0.956608	340.086	253.323	275.463
ENSG00000123689	G0S2	-2.07336	1.02218e-11	-2.25553	2.62563e-13	-0.18217	0.60206	975.786	113.941	93.9091
ENSG00000198755	RPL10A	-0.846356	1.08507e-11	-0.997197	2.17674e-15	-0.150841	0.17632	19742.8	11963	10556.3
ENSG00000114631	PODXL2	1.70849	1.20062e-11	1.67554	6.17642e-11	-0.0329515	0.920555	37.4962	132.766	131.699
ENSG00000155463	OXA1L	-0.646599	1.22189e-11	-0.801317	9.21744e-17	-0.154719	0.0548838	2303.59	1410.67	1260.62
ENSG00000135047	CTSL	-0.673181	1.24391e-11	-0.701782	3.8501e-12	-0.0286007	0.80019	4767.8	2903.83	2842.82
ENSG00000183798	EMILIN3	1.69799	1.24391e-11	1.30735	5.40003e-07	-0.390635	0.0845972	1326.9	5286.6	3378.93
ENSG00000063177	RPL18	-0.93393	1.27639e-11	-1.21984	1.84029e-18	-0.285908	0.0110502	19041	9785.51	7839.64
ENSG00000196659	TTC30B	0.971758	1.27639e-11	0.957029	5.5327e-11	-0.0147297	0.932527	66.3679	132.651	132.329
ENSG00000170515	PA2G4	-0.644921	1.29704e-11	-0.510744	2.49139e-07	0.134177	0.103551	2545.43	1545.81	1756.46
ENSG00000211445	GPX3	-1.90516	1.31377e-11	-2.60716	3.38013e-20	-0.702002	0.00351885	377549	63627.5	38834.2
ENSG00000185634	SHC4	1.49382	1.32349e-11	1.42026	3.11238e-10	-0.0735593	0.772593	128.448	508.11	495.422
ENSG00000142541	RPL13A	-0.832312	1.33188e-11	-0.996499	1.01716e-15	-0.164187	0.128595	54554.5	30324.3	26991.6
ENSG00000184897	H1FX	-0.984265	1.33719e-11	-1.34843	3.87322e-20	-0.36417	0.00164209	3133.49	1466.29	1155.72
ENSG00000125375	ATP5S	-0.974889	1.38771e-11	-0.961846	6.95178e-11	0.0130435	0.946231	422.634	252.787	235.346
ENSG00000063046	EIF4B	-0.920198	1.39952e-11	-1.11811	4.17096e-16	-0.197909	0.0939619	17385.3	10236.7	8792.59
ENSG00000174748	RPL15	-0.762432	1.40044e-11	-0.960618	3.73982e-17	-0.198186	0.035233	45508.8	28034.9	24703.6
ENSG00000060718	COL11A1	1.60033	1.41502e-11	1.30024	1.19386e-07	-0.300093	0.174115	11840.1	49367.4	33385.9
ENSG00000118960	HS1BP3	-0.87041	1.49269e-11	-0.626102	3.63335e-06	0.244308	0.0232548	337.664	171.02	195.825
ENSG00000131620	ANO1	1.1814	1.49269e-11	1.65548	5.7795e-21	0.474084	0.00055051	342.575	775.493	1008.9
ENSG00000169813	HNRNPF	-0.434268	1.51286e-11	-0.365809	3.95229e-08	0.0684595	0.242951	2182.3	1684.18	1747.12
ENSG00000101444	AHCY	-0.612913	1.51995e-11	-0.742948	5.82926e-16	-0.130035	0.097988	1543.19	1015.69	923.901
ENSG00000227097	RPS28P7	-0.943272	1.51995e-11	-1.07919	2.51266e-14	-0.135921	0.302471	1589.67	916.34	768.24
ENSG00000033327	GAB2	-1.39734	1.56907e-11	-1.24359	5.55364e-09	0.153742	0.467763	1065.38	344.732	375.374
ENSG00000111319	SCNN1A	-1.78952	1.57832e-11	-2.30404	8.13623e-18	-0.51452	0.0283402	2079.65	388.311	275.706
ENSG00000123572	NRK	1.14964	1.57832e-11	1.08729	4.75193e-10	-0.0623549	0.746427	571.701	1479.12	1381.89
ENSG00000184232	OAF	0.956648	1.79738e-11	0.680856	5.25458e-06	-0.275792	0.0186136	1176.3	2019.35	1809.08
ENSG00000180447	GAS1	1.44297	1.85947e-11	1.29789	4.22428e-09	-0.145078	0.515209	2385.54	6570.16	6384
ENSG00000142089	IFITM3	-0.997526	1.86466e-11	-0.950304	4.11539e-10	0.0472223	0.780703	14271.4	6366.54	6587.93
ENSG00000114626	ABTB1	-0.842616	2.06838e-11	-1.06692	4.94012e-17	-0.224301	0.034188	800.965	354.42	317.219
ENSG00000141504	SAT2	-0.804555	2.10896e-11	-0.968889	1.44085e-15	-0.164334	0.119069	1002.82	607.781	536.084
ENSG00000176142	TMEM39A	0.67261	2.10896e-11	0.646292	3.22686e-10	-0.0263174	0.819171	1029.33	1702.09	1589.64
ENSG00000148926	ADM	-1.99379	2.11825e-11	-2.14639	1.10447e-12	-0.152598	0.659827	2783.02	490.72	465.788
ENSG00000162645	GBP2	-1.38822	2.11825e-11	-1.53038	3.341e-13	-0.142168	0.506504	7090.87	2362.82	2235.02
ENSG00000188582	PAQR9	2.17473	2.11825e-11	2.05951	4.29543e-10	-0.115215	0.727463	2.4179	18.2062	17.5314
ENSG00000006576	PHTF2	0.853708	2.1228e-11	0.873177	1.80662e-11	0.0194694	0.903474	1103.46	2368.91	2325.53
ENSG00000197111	PCBP2	-0.674849	2.24739e-11	-0.812967	1.46271e-15	-0.138118	0.116032	9434.64	6229.25	5611.2
ENSG00000205352	PRR13	-0.847198	2.24739e-11	-1.04234	3.8045e-16	-0.19514	0.0723995	1990.71	978.913	903.869
ENSG00000147145	LPAR4	1.40478	2.33786e-11	1.24192	9.4264e-09	-0.162866	0.435841	140.62	421.671	366.281
ENSG00000118689	FOXO3	-0.904798	2.36461e-11	-1.02053	1.08574e-13	-0.115732	0.375666	4941.07	2860.14	2737.97
ENSG00000147416	ATP6V1B2	-0.784091	2.40024e-11	-0.463807	0.00022966	0.320284	0.000463998	1471.41	893.468	1088.11
ENSG00000138801	PAPSS1	0.779642	2.49542e-11	0.599772	8.80923e-07	-0.17987	0.0702493	1797.89	3170.89	2827.11
ENSG00000105202	FBL	-0.869237	2.59531e-11	-1.10041	6.81541e-17	-0.231173	0.0344409	1474.68	828.48	698.696
ENSG00000280548	FBL	-0.869237	2.59531e-11	-1.10041	6.81541e-17	-0.231173	0.0344409	1474.68	828.48	698.696
ENSG00000148175	STOM	-0.697738	2.61133e-11	-0.675063	2.95694e-10	0.0226747	0.856808	3739.78	2577.13	2765.39
ENSG00000067225	PKM	0.728645	2.63998e-11	0.561901	8.60984e-07	-0.166745	0.0739613	19948.2	31539	27539.3
ENSG00000141232	TOB1	-1.50072	2.65077e-11	-1.83297	7.02277e-16	-0.332248	0.101258	4945.71	1329.64	1185.58
ENSG00000106823	ECM2	1.23374	2.75614e-11	1.30769	3.97295e-12	0.0739481	0.724262	2907.82	7601.55	8331.24
ENSG00000109771	LRP2BP	1.03064	2.75614e-11	0.835754	1.94853e-07	-0.194886	0.146247	113.325	223.9	191.126
ENSG00000105373	GLTSCR2	-0.966504	2.79659e-11	-1.17619	1.01716e-15	-0.20969	0.097606	10270.7	5515.97	4843.83
ENSG00000265681	RPL17	-0.882922	2.84244e-11	-1.05259	4.07451e-15	-0.169673	0.150379	29850.9	18368.1	16465.7
ENSG00000125354	SEPT6	0.663697	3.11814e-11	0.532356	3.07763e-07	-0.131341	0.129376	792.939	1262.42	1168.74
ENSG00000179134	SAMD4B	-0.693474	3.1574e-11	-0.604574	2.10597e-08	0.0889007	0.375112	1631.5	878.662	938.735
ENSG00000146433	TMEM181	0.736117	3.17902e-11	0.701858	6.48193e-10	-0.0342589	0.783313	622.117	1208.65	1148.34
ENSG00000179222	MAGED1	1.05691	3.39797e-11	0.983557	1.88359e-09	-0.0733488	0.672283	2886.54	6127.87	5573.92
ENSG00000149043	SYT8	2.03331	3.55313e-11	1.75938	2.63891e-08	-0.273931	0.376397	15.142	88.344	89.9105
ENSG00000143870	PDIA6	0.576007	3.56962e-11	0.467096	2.44598e-07	-0.108911	0.155766	5122.42	8264.23	7336.72
ENSG00000155760	FZD7	0.998593	3.59839e-11	0.884878	1.29247e-08	-0.113716	0.443101	466.112	987.113	907.392
ENSG00000144711	IQSEC1	0.945866	3.77455e-11	0.746913	5.47762e-07	-0.198953	0.11228	3239.53	5848.21	5304.75
ENSG00000164713	BRI3	-0.744067	3.91248e-11	-0.580915	7.69149e-07	0.163152	0.0937939	1031.21	650.414	722.015
ENSG00000176971	FIBIN	1.32465	3.94758e-11	0.866226	4.70346e-05	-0.458419	0.00537206	5805.87	18046.3	13250.2
ENSG00000158859	ADAMTS4	-2.45265	3.97189e-11	-1.38422	0.00049479	1.06842	0.00197749	301.193	24.4989	61.9687
ENSG00000166441	RPL27A	-0.836853	4.53949e-11	-0.941421	2.80509e-13	-0.104568	0.395669	19482.6	11414.6	10501.9
ENSG00000127080	IPPK	0.949166	4.85742e-11	0.933354	2.57819e-10	-0.0158117	0.930108	113.192	234.957	230.642
ENSG00000053254	FOXN3	-0.929589	4.90939e-11	-0.757751	2.51793e-07	0.171839	0.176896	2516.78	1289.93	1472.14
ENSG00000104897	SF3A2	-0.657734	4.91535e-11	-0.781357	1.09562e-14	-0.123622	0.165792	987.327	547.422	498.874
ENSG00000169242	EFNA1	-1.32994	4.91535e-11	-1.59372	6.24832e-15	-0.263777	0.153423	954.453	381.006	306.23
ENSG00000063127	SLC6A16	-1.78028	4.94347e-11	-2.42724	8.94495e-19	-0.646957	0.00660155	205.427	45.8548	27.4488
ENSG00000114391	RPL24	-0.934074	5.18005e-11	-1.16513	4.78195e-16	-0.231055	0.0564281	19408.9	10558.7	9179.65
ENSG00000276886	GREM1	2.30084	5.18005e-11	1.82415	5.22524e-07	-0.476682	0.183883	1720.38	16054.3	11084.9
ENSG00000010030	ETV7	-1.80837	5.19963e-11	-1.21201	2.71688e-05	0.596358	0.0175911	47.7176	10.4593	16.1595
ENSG00000168874	ATOH8	-1.6178	5.20165e-11	-2.19776	8.94495e-19	-0.57996	0.00514695	3289.47	844.028	561.294
ENSG00000278550	SLC43A2	-1.62741	5.20165e-11	-1.42626	2.38783e-08	0.20115	0.432733	495.277	104.592	128.406
ENSG00000149100	EIF3M	-0.811923	5.30295e-11	-0.782074	6.79337e-10	0.0298489	0.837848	2404.79	1449.95	1488.88
ENSG00000133112	TPT1	-0.910333	5.40954e-11	-1.07896	1.44827e-14	-0.168632	0.176085	122105	69019.5	62993.3
ENSG00000008988	RPS20	-0.96249	5.98511e-11	-1.15142	9.15208e-15	-0.188932	0.149549	29592.9	16196.9	14172.6
ENSG00000107521	HPS1	-0.510167	6.08924e-11	-0.464051	7.43356e-09	0.046116	0.563418	770.297	519.593	540.732
ENSG00000196843	ARID5A	-1.23912	6.16909e-11	-1.11373	1.16103e-08	0.125397	0.522047	911.471	300.32	315.278
ENSG00000006377	DLX6	0.876334	6.35286e-11	0.618526	1.18275e-05	-0.257808	0.0156622	151.129	292.33	243.759
ENSG00000197496	SLC2A10	0.581234	6.46663e-11	0.549291	1.7957e-09	-0.0319427	0.744814	767.899	1213.63	1123.64
ENSG00000137154	RPS6	-0.8675	6.78044e-11	-1.10234	2.22333e-16	-0.234844	0.0346492	53064.4	30011.3	26469.8
ENSG00000180347	CCDC129	2.03874	7.25577e-11	2.06156	9.50496e-11	0.0228219	0.959877	121.969	731.621	721.696
ENSG00000125743	SNRPD2	-0.737484	8.00505e-11	-0.816392	1.35603e-12	-0.0789076	0.484541	2546.95	1721.3	1605.3
ENSG00000100906	NFKBIA	-1.05631	8.13474e-11	-1.28233	5.30425e-15	-0.226026	0.114926	5258.37	2115.98	1944.91
ENSG00000173801	JUP	-1.31068	8.55912e-11	-0.955276	6.44477e-06	0.355404	0.041059	739.598	226.029	292.961
ENSG00000184602	SNN	-0.783986	8.67142e-11	-0.733472	3.43816e-09	0.050514	0.705464	404.863	229.822	240.496
ENSG00000152749	GPR180	0.751778	8.74079e-11	0.788907	2.06273e-11	0.0371287	0.770639	244.171	493.454	486.855
ENSG00000164649	CDCA7L	-1.29494	8.74732e-11	-1.00701	1.30536e-06	0.28793	0.107274	398.548	157.094	186.509
ENSG00000115419	GLS	0.868457	8.80669e-11	0.789198	1.05745e-08	-0.0792593	0.565127	1362.43	2760.06	2601.07
ENSG00000147403	RPL10	-0.736391	8.90973e-11	-0.90436	2.92834e-15	-0.167969	0.0852622	43321.3	29519.7	25720.1
ENSG00000125970	RALY	-0.455467	8.91868e-11	-0.336438	4.99774e-06	0.119029	0.0416698	1609.23	1130.38	1192.11
ENSG00000145029	NICN1	0.793302	8.93914e-11	0.559852	1.44079e-05	-0.23345	0.0171491	165.265	250.278	219.089
ENSG00000163874	ZC3H12A	-1.4968	9.05485e-11	-1.62473	4.34336e-12	-0.127928	0.615392	451.999	108.574	96.7455
ENSG00000087086	FTL	-0.92022	9.08471e-11	-0.83491	1.16081e-08	0.0853098	0.560577	60102.5	29525.3	31868
ENSG00000198825	INPP5F	0.811534	9.08471e-11	0.576252	1.26707e-05	-0.235282	0.0218096	674.01	1291.7	1084.44
ENSG00000143842	SOX13	-1.5753	9.62827e-11	-1.48828	2.4478e-09	0.0870127	0.764116	448.791	108.799	129.566
ENSG00000161011	SQSTM1	-0.628881	9.83614e-11	-0.712482	4.95208e-13	-0.0836009	0.367233	9910.85	5690.25	5426.44
ENSG00000070770	CSNK2A2	-0.786653	1.01919e-10	-0.762682	9.42765e-10	0.0239709	0.872527	1079.72	619.371	622.137
ENSG00000124145	SDC4	-1.47155	1.03946e-10	-1.56806	1.25963e-11	-0.0965096	0.710664	8978.74	2570.54	2275.61
ENSG00000137040	RANBP6	0.740355	1.04985e-10	0.718269	9.01182e-10	-0.0220864	0.872527	328.282	593.698	598.439
ENSG00000108219	TSPAN14	-1.15124	1.13326e-10	-0.235822	0.305718	0.915417	1.59679e-11	387.339	149.648	268.361
ENSG00000178982	EIF3K	-0.616454	1.14419e-10	-0.652229	2.15652e-11	-0.0357743	0.736883	2693.12	1748.37	1709.96
ENSG00000105711	SCN1B	-0.938079	1.15473e-10	-0.870558	6.0141e-09	0.0675211	0.670468	655.806	297.544	312.591
ENSG00000185359	HGS	-0.633454	1.2038e-10	-0.590616	5.28148e-09	0.0428378	0.687715	1465.03	887.408	921.859
ENSG00000162694	EXTL2	1.03969	1.36665e-10	1.22602	6.79786e-14	0.18633	0.201119	295.806	679.189	753.18
ENSG00000115009	CCL20	-2.62727	1.42231e-10	-2.17682	2.18178e-07	0.450455	0.365038	73.3308	3.59048	5.88553
ENSG00000107518	ATRNL1	1.80125	1.42321e-10	1.7861	4.29543e-10	-0.0151573	0.968967	39.232	192.549	174.485
ENSG00000183691	NOG	1.72438	1.55515e-10	1.53224	3.21041e-08	-0.192144	0.485107	32.0764	137.93	111.815
ENSG00000169919	GUSB	0.772116	1.72189e-10	0.583062	4.16943e-06	-0.189054	0.0647252	1446.69	2438.72	2059.52
ENSG00000198355	PIM3	-1.29457	1.73487e-10	-1.73415	2.19346e-17	-0.439577	0.00896393	4495.79	1678.06	1230.27
ENSG00000003436	TFPI	-1.47559	1.76231e-10	-0.960164	9.28069e-05	0.515427	0.00800075	678.222	254.713	345.826
ENSG00000115268	RPS15	-0.833854	1.76231e-10	-0.991692	5.981e-14	-0.157838	0.177592	8331.62	4357.44	3826.93
ENSG00000119655	NPC2	-0.803295	1.76231e-10	-0.679795	1.92584e-07	0.123501	0.29325	5805.25	3147.43	3369.68
ENSG00000157593	SLC35B2	0.788332	1.88953e-10	0.591502	5.09838e-06	-0.19683	0.0594873	1350.44	2514.83	2063.31
ENSG00000154229	PRKCA	0.774159	1.94207e-10	0.676699	7.31173e-08	-0.0974593	0.40669	1800.67	3093.96	2975.96
ENSG00000101230	ISM1	0.977113	1.95858e-10	0.648322	6.97901e-05	-0.328791	0.00839181	5104.23	11055.9	9321.17
ENSG00000031698	SARS	-0.568274	2.04943e-10	-0.618837	9.35288e-12	-0.0505632	0.583187	3638.68	2436.52	2335.25
ENSG00000160862	AZGP1	-2.52715	2.11412e-10	-3.21112	8.29371e-16	-0.683974	0.11401	140.524	10.9659	3.67646
ENSG00000168675	LDLRAD4	0.915729	2.15902e-10	0.773224	2.33778e-07	-0.142505	0.289634	1580.04	3019.55	2813.26
ENSG00000185950	IRS2	-1.03681	2.21981e-10	-1.27598	9.49488e-15	-0.239172	0.0949152	938.779	398.067	326.908
ENSG00000179403	VWA1	1.06412	2.22855e-10	0.884677	3.78054e-07	-0.179441	0.24782	1069.24	2017.06	1832.77
ENSG00000187260	WDR86	-2.35168	2.31637e-10	-1.79167	3.06573e-06	0.560007	0.156585	51.3581	6.07837	8.54482
ENSG00000111199	TRPV4	1.18783	2.3778e-10	0.640324	0.00168499	-0.547508	0.000201329	3923.07	8518.8	6009.33
ENSG00000254772	EEF1G	-0.668718	2.39351e-10	-0.832325	5.11041e-15	-0.163607	0.0676854	38982.7	23881	21661.4
ENSG00000118985	ELL2	-1.2774	2.5203e-10	-1.6897	9.33893e-17	-0.412302	0.0145658	11785.9	5306.96	4081.28
ENSG00000122026	RPL21	-0.87864	2.5203e-10	-0.994946	1.559e-12	-0.116306	0.385682	14890.1	10374.9	9618.64
ENSG00000064309	CDON	1.4502	2.52992e-10	1.4605	4.21517e-10	0.010297	0.974135	2645.95	7659.8	8233.31
ENSG00000100221	JOSD1	-0.396021	2.58765e-10	-0.336443	2.25449e-07	0.0595786	0.304087	1028.13	805.463	817.036
ENSG00000177453	NIM1K	1.17857	2.65669e-10	1.03927	6.81068e-08	-0.139298	0.447123	139.388	348.666	312.85
ENSG00000160161	CILP2	1.69599	2.6679e-10	1.29051	4.2502e-06	-0.405484	0.100228	9792.14	39076.1	29537
ENSG00000072071	LPHN1	1.39539	2.73283e-10	1.56034	3.21837e-12	0.164946	0.45495	113.801	338.501	358.916
ENSG00000084710	EFR3B	1.60084	2.87003e-10	1.25734	2.0705e-06	-0.343495	0.131867	46.3559	172.621	126.089
ENSG00000197756	RPL37A	-0.877522	2.90834e-10	-1.12206	1.15161e-15	-0.244536	0.0356977	26016.7	15282.1	12374
ENSG00000177283	FZD8	1.0513	3.04946e-10	0.769139	1.17248e-05	-0.282159	0.046399	2270.01	4688.71	3949.25
ENSG00000100417	PMM1	-0.697264	3.3242e-10	-0.806481	7.44493e-13	-0.109217	0.293806	579.485	332.653	290.061
ENSG00000103381	CPPED1	0.709919	3.65554e-10	0.676735	5.77572e-09	-0.0331838	0.793494	563.296	982.885	960.292
ENSG00000274005	RPS9	-0.986377	3.65554e-10	-1.05947	3.5262e-11	-0.0730974	0.668407	2294.56	1181.45	1115.69
ENSG00000274626	RPS9	-0.986377	3.65554e-10	-1.05947	3.5262e-11	-0.0730974	0.668407	2294.56	1181.45	1115.69
ENSG00000275323	RPS9	-0.986377	3.65554e-10	-1.05947	3.5262e-11	-0.0730974	0.668407	2294.56	1181.45	1115.69
ENSG00000277079	RPS9	-0.986377	3.65554e-10	-1.05947	3.5262e-11	-0.0730974	0.668407	2294.56	1181.45	1115.69
ENSG00000277359	RPS9	-0.986377	3.65554e-10	-1.05947	3.5262e-11	-0.0730974	0.668407	2294.56	1181.45	1115.69
ENSG00000278081	RPS9	-0.986377	3.65554e-10	-1.05947	3.5262e-11	-0.0730974	0.668407	2294.56	1181.45	1115.69
ENSG00000163661	PTX3	-2.0871	3.67038e-10	-0.618285	0.119816	1.46881	1.41617e-07	165.031	24.0697	68.5408
ENSG00000113368	LMNB1	-1.8004	3.75508e-10	-1.1106	0.000283636	0.689803	0.00624673	82.4588	21.342	33.2739
ENSG00000161960	EIF4A1	-0.783003	3.87878e-10	-0.602035	4.2502e-06	0.180968	0.0935625	6798.23	4139.64	4568.38
ENSG00000169933	FRMPD4	1.45982	3.90901e-10	1.37664	8.97879e-09	-0.083187	0.742829	23.1837	86.0708	79.4968
ENSG00000196531	NACA	-0.761226	4.09091e-10	-0.894007	3.93061e-13	-0.132781	0.231644	15484.5	10734	9889.17
ENSG00000132000	PODNL1	0.997391	4.18055e-10	0.843821	3.48292e-07	-0.15357	0.306842	1340.42	2469.58	2330.54
ENSG00000183114	FAM43B	1.51135	4.45628e-10	1.26331	5.03095e-07	-0.248037	0.28534	115.992	400.786	276.481
ENSG00000059573	ALDH18A1	0.716017	4.51666e-10	0.598217	5.31353e-07	-0.1178	0.262793	1665.49	2960.49	2538.17
ENSG00000047579	DTNBP1	-0.817023	4.52564e-10	-0.873041	5.86087e-11	-0.0560174	0.696746	337.778	198.659	189.397
ENSG00000176170	SPHK1	-1.87509	4.56151e-10	-0.932614	0.00462422	0.942479	0.000224629	173.158	32.651	64.5123
ENSG00000142627	EPHA2	-1.44443	4.94382e-10	-1.14245	2.3159e-06	0.301982	0.159873	569.164	161.928	206.708
ENSG00000104714	ERICH1	-1.08683	4.95246e-10	-1.00397	2.28833e-08	0.0828634	0.664752	447.918	162.022	183.131
ENSG00000149575	SCN2B	1.23903	4.96537e-10	0.83981	6.97901e-05	-0.399216	0.0152388	196.064	494.623	364.889
ENSG00000156508	EEF1A1	-0.662027	4.96537e-10	-0.742546	5.97165e-12	-0.0805194	0.438032	353101	238571	227969
ENSG00000166439	RNF169	-0.445675	4.96537e-10	-0.402109	5.50414e-08	0.0435652	0.546908	417.5	342.767	343.797
ENSG00000183340	JRKL	0.64693	4.96537e-10	0.592902	3.00856e-08	-0.0540279	0.610672	360.042	643.262	615.234
ENSG00000186684	CYP27C1	1.14211	5.06217e-10	1.28863	4.34336e-12	0.146513	0.413406	224.446	528.629	596.25
ENSG00000185022	MAFF	-1.4663	5.34568e-10	-1.61945	1.3455e-11	-0.153157	0.541483	1231.84	336.616	313.091
ENSG00000180834	MAP6D1	1.42936	5.5831e-10	1.11683	3.50144e-06	-0.312525	0.117993	36.9577	121.151	93.3654
ENSG00000122406	RPL5	-0.808862	5.70518e-10	-0.993041	4.50583e-14	-0.184179	0.103742	28673.7	17176.6	15328.3
ENSG00000133055	MYBPH	-2.17561	6.12164e-10	-2.50307	1.71419e-12	-0.327464	0.405111	300.756	24.2337	22.0818
ENSG00000161970	RPL26	-0.876263	6.33967e-10	-0.995441	4.15597e-12	-0.119178	0.383078	27754.1	16377.2	15522.3
ENSG00000105707	HPN	-2.01914	6.38527e-10	-2.47348	8.75875e-14	-0.454338	0.186501	76.6827	10.2458	6.18154
ENSG00000120658	ENOX1	1.43956	6.5492e-10	1.53844	7.49936e-11	0.0988769	0.697799	48.2441	165.263	183.414
ENSG00000131269	ABCB7	-0.611175	6.67108e-10	-0.611319	1.54999e-09	-0.000143178	0.999143	375.25	249.377	258.085
ENSG00000109332	UBE2D3	-0.655093	6.79743e-10	-0.618875	1.4027e-08	0.0362179	0.76104	5836.49	3658.81	3951.52
ENSG00000182899	RPL35A	-0.893392	6.9641e-10	-1.04938	7.77915e-13	-0.155988	0.24147	14281.6	9196.13	8053.93
ENSG00000141569	TRIM65	0.723688	7.07809e-10	0.674305	2.29128e-08	-0.0493835	0.694251	373.122	530.262	550.92
ENSG00000184432	COPB2	0.542989	7.07809e-10	0.577138	1.18301e-10	0.034149	0.723792	3024.61	4810.68	4714.71
ENSG00000213741	RPS29	-0.857871	7.07913e-10	-1.02373	3.37137e-13	-0.16586	0.184584	6646.99	4256.46	3576.13
ENSG00000168040	FADD	0.555462	7.12211e-10	0.641783	1.91877e-12	0.0863208	0.278453	217.922	320.984	328.13
ENSG00000155090	KLF10	-1.07575	7.19183e-10	-1.00169	2.40531e-08	0.0740621	0.701338	2820.63	1374.14	1514.52
ENSG00000188042	ARL4C	-1.93035	7.20335e-10	-0.276277	0.527293	1.65407	9.38923e-11	605.448	95.1686	336.794
ENSG00000058668	ATP2B4	0.69746	7.53997e-10	0.798123	3.60042e-12	0.100663	0.346958	4001.67	6290.98	7065.43
ENSG00000234851	RP11-3P17.3	-0.808037	7.53997e-10	-0.953752	6.67252e-13	-0.145715	0.222783	16214.2	10080.6	9707.73
ENSG00000087076	HSD17B14	-1.40658	7.72657e-10	-1.80725	4.07451e-15	-0.400672	0.0462794	417.983	131.545	95.2834
ENSG00000156482	RPL30	-0.876503	7.72657e-10	-1.05763	2.03387e-13	-0.181128	0.152361	24513.6	14136.3	12672
ENSG00000143942	CHAC2	-1.77678	7.81784e-10	-1.94798	3.06125e-11	-0.171204	0.602441	213.246	53.6762	46.5169
ENSG00000134419	RPS15A	-0.846673	7.9237e-10	-0.92818	3.28214e-11	-0.0815065	0.565783	16719.7	10342.2	9659.58
ENSG00000049192	ADAMTS6	1.66601	7.96418e-10	1.6325	3.89291e-09	-0.0335173	0.927506	229.388	730.183	713.554
ENSG00000146278	PNRC1	-1.20293	7.96418e-10	-1.44092	3.17312e-13	-0.237989	0.18371	3862.77	1955.97	1722.91
ENSG00000183696	UPP1	-1.08554	7.96418e-10	-0.91656	5.73773e-07	0.168983	0.319366	369.874	153.491	166.39
ENSG00000185122	HSF1	-0.749853	7.96418e-10	-0.846757	7.74306e-12	-0.0969039	0.413944	1231.61	629.971	596.8
ENSG00000117362	APH1A	-0.484599	8.03009e-10	-0.570213	9.08505e-13	-0.0856135	0.230618	2958.95	2194.39	2019.33
ENSG00000169738	DCXR	-1.35144	8.07039e-10	-1.85311	5.63458e-17	-0.501672	0.00595295	1772.45	573.449	394.063
ENSG00000171863	RPS7	-0.77788	8.22704e-10	-0.832716	1.04239e-10	-0.0548365	0.689485	15666.5	10657	9917.25
ENSG00000241343	RPL36A	-0.926826	8.25955e-10	-1.17942	8.34852e-15	-0.25259	0.0478813	10720.6	6730.02	5677.8
ENSG00000119950	MXI1	-0.990884	8.45153e-10	-1.25699	1.04354e-14	-0.26611	0.0532363	1866.26	881.966	769.184
ENSG00000163435	ELF3	-1.98946	9.03937e-10	-2.38313	3.37137e-13	-0.393666	0.235538	455.635	57.9481	48.1288
ENSG00000112473	SLC39A7	0.583141	9.28196e-10	0.537144	4.45204e-08	-0.0459968	0.644158	609.003	949.692	850.831
ENSG00000065154	OAT	0.645549	9.94394e-10	0.520381	2.31126e-06	-0.125168	0.182339	2572.59	4820.06	4290.51
ENSG00000185386	MAPK11	-1.15661	1.00084e-09	-1.27497	3.67996e-11	-0.11836	0.556794	206.823	78.4916	70.5429
ENSG00000206288	SLC39A7	0.582301	1.00084e-09	0.535631	4.96517e-08	-0.0466694	0.639172	609.569	950.614	851.168
ENSG00000224399	SLC39A7	0.582301	1.00084e-09	0.535631	4.96517e-08	-0.0466694	0.639172	609.569	950.614	851.168
ENSG00000226614	SLC39A7	0.582301	1.00084e-09	0.535631	4.96517e-08	-0.0466694	0.639172	609.569	950.614	851.168
ENSG00000227402	SLC39A7	0.582301	1.00084e-09	0.535631	4.96517e-08	-0.0466694	0.639172	609.569	950.614	851.168
ENSG00000229802	SLC39A7	0.582301	1.00084e-09	0.535631	4.96517e-08	-0.0466694	0.639172	609.569	950.614	851.168
ENSG00000275111	ZNF2	0.862272	1.00084e-09	0.827309	1.05438e-08	-0.0349628	0.820907	69.9681	119.712	116.965
ENSG00000139211	AMIGO2	1.23295	1.00761e-09	0.915411	1.56755e-05	-0.31754	0.0627622	81.4524	239.058	201.066
ENSG00000065978	YBX1	-0.519746	1.15945e-09	-0.343917	0.000156787	0.175829	0.0103467	8966.8	6194.45	7078.97
ENSG00000196666	FAM180B	1.87385	1.17621e-09	1.5938	5.73773e-07	-0.280055	0.382123	86.2106	371.58	290.935
ENSG00000198780	FAM169A	2.37389	1.19363e-09	2.08974	1.77247e-07	-0.284151	0.494636	0.952022	18.6087	11.7325
ENSG00000170222	ADPRM	-0.764532	1.2353e-09	-0.903043	1.52117e-12	-0.13851	0.233248	167.037	111.333	101.07
ENSG00000115325	DOK1	1.15309	1.24476e-09	0.910085	4.43599e-06	-0.243004	0.153355	461.886	1155.7	945.111
ENSG00000186716	BCR	-1.27225	1.29678e-09	-1.12166	2.27584e-07	0.150588	0.4815	1905.07	569.95	631.178
ENSG00000100242	SUN2	-0.933317	1.30293e-09	-1.09335	2.09281e-12	-0.160034	0.261299	12254.9	5072.41	4626.65
ENSG00000088812	ATRN	0.843472	1.34922e-09	0.78836	3.68107e-08	-0.0551113	0.72021	1941.48	3552.99	3325.43
ENSG00000183454	GRIN2A	1.95767	1.35782e-09	1.48953	1.03946e-05	-0.468144	0.124178	22.0827	132.691	85.5266
ENSG00000130707	ASS1	-1.02426	1.46338e-09	-1.39403	2.60959e-16	-0.36977	0.00719222	9842.82	4469.63	3445.55
ENSG00000156006	NAT2	1.2396	1.46338e-09	1.007	2.21454e-06	-0.232594	0.160233	18.3995	47.471	40.6108
ENSG00000114993	RTKN	0.737191	1.46659e-09	0.483913	0.000196843	-0.253277	0.00956465	792.627	1151.58	976.128
ENSG00000110700	RPS13	-0.884005	1.53659e-09	-1.07505	3.37137e-13	-0.191041	0.139086	13719.9	8574.03	7387.06
ENSG00000128309	MPST	-0.980577	1.58387e-09	-1.20092	2.47049e-13	-0.220346	0.125652	911.319	389.895	313.584
ENSG00000072682	P4HA2	1.03571	1.63782e-09	0.863358	1.33792e-06	-0.172351	0.284155	1564.18	3452.91	2862.28
ENSG00000126246	IGFLR1	-1.53356	1.69e-09	-1.45513	2.65624e-08	0.0784276	0.800192	136.208	36.863	37.6544
ENSG00000121774	KHDRBS1	-0.508676	1.75636e-09	-0.590721	4.96165e-12	-0.0820445	0.29325	2895.02	2273.7	2115.28
ENSG00000112306	RPS12	-0.8636	1.75816e-09	-1.02566	1.50188e-12	-0.16206	0.213244	20365.8	12177.9	10536.3
ENSG00000116670	MAD2L2	-0.704603	1.82326e-09	-0.705016	4.27605e-09	-0.000412598	0.99813	376.866	216.783	205.075
ENSG00000050426	LETMD1	-0.756197	1.88606e-09	-0.997916	3.01692e-15	-0.241719	0.0196101	1104.29	642.543	552.913
ENSG00000136110	LECT1	1.99336	1.91121e-09	1.82289	8.94999e-08	-0.170472	0.667449	945.677	6614.25	4360.1
ENSG00000125651	GTF2F1	-0.536154	1.94308e-09	-0.499733	5.36141e-08	0.0364209	0.708186	1681.76	1028.92	1094.96
ENSG00000071991	CDH19	1.33946	1.97666e-09	1.05375	6.19276e-06	-0.285706	0.156887	143.544	394.879	310.365
ENSG00000112559	MDFI	1.18378	1.97666e-09	0.765188	0.000280799	-0.418588	0.0100111	1576.05	3296.86	2411.22
ENSG00000112759	SLC29A1	0.932157	1.97666e-09	0.806779	5.44739e-07	-0.125378	0.40669	6495.7	11095.4	10244.2
ENSG00000137285	TUBB2B	1.26025	1.97666e-09	0.686849	0.00269757	-0.573404	0.000610768	1012.71	2548.51	1763.87
ENSG00000274950	RPS9	-0.9384	1.97666e-09	-1.05328	3.12936e-11	-0.114876	0.458269	2766.56	1461.31	1330.67
ENSG00000188662	HILS1	1.55007	2.0105e-09	0.945868	0.000651771	-0.6042	0.00445641	52.3556	161.514	102.392
ENSG00000136877	FPGS	-0.816324	2.07103e-09	-0.912046	4.08786e-11	-0.0957224	0.48035	1167.41	518.437	509.22
ENSG00000065457	ADAT1	0.72371	2.10619e-09	0.692758	2.40531e-08	-0.0309522	0.818494	175.272	297.492	291.835
ENSG00000140368	PSTPIP1	1.21522	2.1257e-09	0.865533	5.44197e-05	-0.34969	0.0410069	156.16	328.748	236.156
ENSG00000173812	EIF1	-0.811595	2.14919e-09	-1.0666	4.73094e-15	-0.255	0.0223918	16395	10454.4	8694.06
ENSG00000116704	SLC35D1	0.73656	2.19376e-09	0.499638	0.000135405	-0.236922	0.0176549	627.127	1197.97	998.246
ENSG00000130958	SLC35D2	-0.689093	2.22882e-09	-0.638278	7.64658e-08	0.0508151	0.68463	266.821	165.969	164.375
ENSG00000137876	RSL24D1	-0.972432	2.23642e-09	-1.08422	4.92051e-11	-0.111789	0.493801	2966.21	1833.79	1718.73
ENSG00000084092	NOA1	-0.550013	2.31246e-09	-0.52344	3.09595e-08	0.0265733	0.798412	545.265	359.039	368.705
ENSG00000117906	RCN2	0.793578	2.3864e-09	0.611693	1.12863e-05	-0.181885	0.114534	1385.67	3106.59	2643.91
ENSG00000014257	ACPP	-2.36899	2.44029e-09	-1.91076	3.09267e-06	0.45823	0.319366	69.231	7.73596	8.17785
ENSG00000144649	FAM198A	1.53656	2.45045e-09	1.14188	2.45642e-05	-0.394688	0.0863281	108.748	421.277	318.395
ENSG00000141574	SECTM1	-2.06089	2.47259e-09	-0.124412	0.821537	1.93648	3.8767e-11	64.1547	8.36963	44.331
ENSG00000067057	PFKP	0.983262	2.47668e-09	1.18717	9.60546e-13	0.203908	0.167136	2507.47	4803.99	5664.45
ENSG00000162714	ZNF496	-0.487545	2.5635e-09	-0.537951	9.65861e-11	-0.0504065	0.543232	937.631	616.154	604.462
ENSG00000164106	SCRG1	1.37334	2.57104e-09	0.803695	0.00124247	-0.569647	0.00254236	12020.5	43556.1	26211.2
ENSG00000107829	FBXW4	-0.740369	2.61423e-09	-0.800098	2.50825e-10	-0.0597294	0.653243	1074.66	590.334	577.812
ENSG00000105443	CYTH2	-0.546161	2.74813e-09	-0.509501	7.1506e-08	0.0366595	0.716033	833.946	523.855	521.791
ENSG00000158163	DZIP1L	0.794999	2.74813e-09	0.477689	0.000922035	-0.31731	0.00226541	231.893	372.445	297.897
ENSG00000115484	CCT4	-0.597686	2.7786e-09	-0.550282	1.1189e-07	0.0474041	0.656726	1879.01	1382.2	1427.15
ENSG00000084754	HADHA	-0.407233	2.89677e-09	-0.448749	1.16631e-10	-0.0415166	0.548494	4044.66	3196.28	3023.8
ENSG00000033100	CHPF2	0.707318	2.9138e-09	0.756968	4.23522e-10	0.0496501	0.699964	1270.38	2071.87	1962.18
ENSG00000116641	DOCK7	0.564763	2.93395e-09	0.439307	1.04755e-05	-0.125456	0.125643	1050.62	1797.26	1612.82
ENSG00000077312	SNRPA	-0.810788	2.94163e-09	-1.16138	2.62775e-17	-0.350594	0.00108159	1264.15	581.189	478.535
ENSG00000161179	YDJC	-0.932171	3.00371e-09	-1.02999	1.18301e-10	-0.0978221	0.549643	199.878	91.8714	84.5442
ENSG00000149968	MMP3	-2.02946	3.04038e-09	-2.23615	1.02408e-10	-0.206688	0.606941	91245.1	16992.1	13989
ENSG00000140464	PML	-0.707904	3.0482e-09	-0.691937	1.61571e-08	0.0159661	0.916732	1034.61	569.496	578.213
ENSG00000132475	H3F3B	-0.678285	3.13837e-09	-0.837434	4.03669e-13	-0.159149	0.107916	20135.6	12320.4	11560.3
ENSG00000167526	RPL13	-0.931592	3.21565e-09	-1.21209	1.72546e-14	-0.280497	0.0328891	38156.8	19994.6	16352.3
ENSG00000167658	EEF2	-0.69386	3.22698e-09	-0.871471	1.61745e-13	-0.177611	0.074528	61253.2	37927.8	32649.3
ENSG00000126785	RHOJ	0.933015	3.30371e-09	0.688985	3.3504e-05	-0.24403	0.0692091	716.52	1371.2	1113.6
ENSG00000121316	PLBD1	0.894774	3.32372e-09	1.02202	2.52194e-11	0.127245	0.37935	741.819	1377.45	1538.7
ENSG00000103429	BFAR	-0.646184	3.33416e-09	-0.588195	1.84582e-07	0.057989	0.6101	955.081	634.457	653.937
ENSG00000108107	RPL28	-0.864007	3.37555e-09	-0.969999	5.92978e-11	-0.105992	0.462478	9993.75	5292.88	4929.15
ENSG00000175592	FOSL1	-1.9064	3.46573e-09	-1.06507	0.00221139	0.841335	0.00321556	164.493	19.1512	35.4322
ENSG00000198189	HSD17B11	-1.44321	3.49988e-09	-0.379941	0.210055	1.06327	1.87295e-08	378.378	124.482	291.235
ENSG00000178605	GTPBP6	-0.666275	3.50419e-09	-0.797232	2.80158e-12	-0.130957	0.198274	829.134	432.45	389.515
ENSG00000177674	AGTRAP	-0.755643	3.67888e-09	-0.891671	6.05898e-12	-0.136028	0.24797	815.777	444.758	384.435
ENSG00000154930	ACSS1	-1.24412	3.69085e-09	-0.991197	6.62555e-06	0.252928	0.200642	177.801	61.0904	78.6942
ENSG00000105321	CCDC9	-0.665802	3.70346e-09	-0.662031	1.055e-08	0.00377028	0.979558	486.774	276.8	277.313
ENSG00000173275	ZNF449	0.713167	3.70444e-09	0.804348	4.53879e-11	0.0911814	0.420082	146.388	249.066	263.831
ENSG00000149136	SSRP1	-0.419019	3.75176e-09	-0.431021	2.91426e-09	-0.012002	0.890139	2031.49	1519.61	1516.02
ENSG00000107902	LHPP	1.11638	3.81599e-09	0.750714	0.000196966	-0.365669	0.0195432	235.938	466.684	342.954
ENSG00000258289	CHURC1	-0.614901	3.86309e-09	-0.655346	7.06378e-10	-0.0404448	0.725467	2434.13	1788.88	1804.86
ENSG00000165029	ABCA1	-1.44533	3.95814e-09	-0.699129	0.010155	0.7462	0.000159045	497.939	180.036	344.665
ENSG00000111816	FRK	0.914748	4.07412e-09	0.932807	4.20018e-09	0.0180594	0.926867	140.145	295.181	281.122
ENSG00000165102	HGSNAT	0.481259	4.10723e-09	0.557803	1.66626e-11	0.0765433	0.310093	1273.02	1613.97	1724.32
ENSG00000046653	GPM6B	-1.40547	4.18011e-09	-1.43549	4.13729e-09	-0.0300221	0.925584	1164.07	418.806	370.008
ENSG00000128283	CDC42EP1	-0.958199	4.18011e-09	-0.550726	0.00181265	0.407473	0.00165064	778.332	301.64	390.52
ENSG00000116285	ERRFI1	-1.31094	4.29893e-09	-1.43175	2.69212e-10	-0.120806	0.616851	16538.4	6316.01	6264.96
ENSG00000118816	CCNI	-0.894826	4.31824e-09	-1.12363	2.57707e-13	-0.228802	0.0809758	9292.62	5729.97	4937.75
ENSG00000168264	IRF2BP2	-0.948222	4.31824e-09	-1.00213	1.12249e-09	-0.0539051	0.768646	4217.09	1864.43	1923.33
ENSG00000196998	WDR45	-0.592603	4.32142e-09	-0.707255	4.14104e-12	-0.114652	0.205892	1215.78	705.293	676.591
ENSG00000146426	TIAM2	0.73593	4.42234e-09	0.642166	7.85871e-07	-0.0937647	0.442796	1179.84	1925.48	1953.68
ENSG00000114779	ABHD14B	-0.751361	4.44278e-09	-1.05041	3.20376e-16	-0.299045	0.00328863	1259.94	685.652	563.452
ENSG00000136997	MYC	-1.40583	4.44278e-09	-1.2797	2.2502e-07	0.12613	0.633891	1074.14	336.352	403.833
ENSG00000166741	NNMT	-1.02168	4.50278e-09	-1.26921	4.91913e-13	-0.247523	0.104903	27652	13873.6	12626
ENSG00000154122	ANKH	0.876252	4.51557e-09	0.85107	2.91403e-08	-0.0251821	0.892334	13092	23380.7	22534.3
ENSG00000112414	GPR126	1.08764	4.55397e-09	0.665001	0.000867461	-0.422641	0.00485777	2412.1	5717.11	4544.16
ENSG00000187239	FNBP1	-0.764664	4.55397e-09	-0.538915	9.45045e-05	0.225749	0.0382162	516.032	293.564	356.047
ENSG00000198736	MSRB1	-0.947773	4.55397e-09	-0.993591	1.69175e-09	-0.0458173	0.805927	687.303	345.515	323.873
ENSG00000092096	SLC22A17	0.853533	4.6421e-09	0.461237	0.00381257	-0.392296	0.000531564	1451.59	2417.36	1736.89
ENSG00000014914	MTMR11	0.615621	4.665e-09	0.344235	0.00263953	-0.271386	0.000777907	739.613	1126.85	968.333
ENSG00000171067	C11orf24	0.767356	4.76656e-09	0.833746	3.85994e-10	0.0663896	0.628972	710.692	1182.96	1160.95
ENSG00000110811	P3H3	0.898649	4.95737e-09	0.685854	2.14271e-05	-0.212795	0.112108	1912.34	3457.21	2736.96
ENSG00000185219	ZNF445	0.55162	5.15045e-09	0.453303	4.22819e-06	-0.0983168	0.228382	150.54	209.789	187.792
ENSG00000280640	ZNF445	0.55162	5.15045e-09	0.453303	4.22819e-06	-0.0983168	0.228382	150.54	209.789	187.792
ENSG00000094916	CBX5	0.693805	5.2782e-09	0.72156	2.70426e-09	0.0277551	0.84183	2216.63	4033.23	4089.39
ENSG00000278167	CCL18	-2.55043	5.2782e-09	-0.615619	0.254894	1.93481	1.48525e-05	100.542	2.20759	18.1193
ENSG00000148834	GSTO1	-0.800794	5.35176e-09	-0.809655	8.25361e-09	-0.00886105	0.961028	1893.57	1328.7	1250.72
ENSG00000198585	NUDT16	-0.439315	5.35176e-09	-0.494425	9.59863e-11	-0.0551106	0.452167	1138.85	764.254	743.736
ENSG00000143382	ADAMTSL4	-0.863381	5.45786e-09	-0.905352	2.02321e-09	-0.0419708	0.804491	1832.88	916.25	929.078
ENSG00000136244	IL6	-2.49009	5.51672e-09	-1.9077	1.4985e-05	0.582385	0.254622	63.0551	2.79907	4.34512
ENSG00000137818	RPLP1	-0.779376	5.61265e-09	-0.984213	2.80509e-13	-0.204837	0.0718493	27382.9	14983.4	13179.9
ENSG00000173227	SYT12	1.60423	5.61265e-09	1.88537	1.10351e-11	0.281143	0.293853	52.9067	187.494	201.897
ENSG00000142534	RPS11	-0.801632	5.71143e-09	-0.973513	2.45509e-12	-0.171881	0.158826	46435.2	26642.4	23808
ENSG00000149823	VPS51	-0.638554	5.74907e-09	-0.616739	4.45191e-08	0.0218146	0.869994	1540.06	817.912	813.102
ENSG00000176438	SYNE3	-0.867609	5.79276e-09	-0.518056	0.0012801	0.349552	0.00326454	1241.07	607.304	793.931
ENSG00000102313	ITIH6	1.32035	5.98544e-09	0.919765	0.000132983	-0.400584	0.0406104	4183.21	10335	8007.34
ENSG00000117228	GBP1	-1.48809	6.10499e-09	-1.11879	3.14157e-05	0.369307	0.115282	504.832	130.348	185.092
ENSG00000170608	FOXA3	1.33229	6.3034e-09	0.815645	0.000951232	-0.51665	0.00614662	185.872	500.503	332.756
ENSG00000009307	CSDE1	-0.504001	6.60446e-09	-0.488113	4.59699e-08	0.0158883	0.881316	12848.1	10185	10226.8
ENSG00000256235	SMIM3	-1.21713	6.60446e-09	-1.12975	1.76017e-07	0.0873789	0.711492	1842.43	686.831	770.307
ENSG00000150991	UBC	-0.910636	6.67016e-09	-1.00035	3.58124e-10	-0.0897167	0.582323	72642.3	38438	35732.8
ENSG00000077232	DNAJC10	0.649143	6.80381e-09	0.720024	2.45902e-10	0.070881	0.527287	2071.9	3487.85	3596.94
ENSG00000137267	TUBB2A	1.04749	7.16406e-09	0.815933	1.69662e-05	-0.231552	0.151779	964.82	2009.15	1576.48
ENSG00000120341	SEC16B	0.796818	7.24559e-09	0.661405	4.02215e-06	-0.135413	0.284159	346.941	590.817	498.905
ENSG00000181915	ADO	0.590278	7.35904e-09	0.765928	6.88936e-14	0.175649	0.0301253	212.854	344.878	384.344
ENSG00000142230	SAE1	-0.596928	7.44198e-09	-0.429611	8.31124e-05	0.167317	0.0530949	944.513	625.55	686
ENSG00000188846	RPL14	-0.81969	7.47362e-09	-0.927368	1.11621e-10	-0.107678	0.437816	13713.4	8713.02	8196.36
ENSG00000175426	PCSK1	-2.13352	7.48498e-09	-2.26021	1.55509e-09	-0.12669	0.796994	158.014	26.3166	18.4735
ENSG00000071082	RPL31	-0.860552	7.81017e-09	-1.03034	7.74306e-12	-0.169789	0.208256	17187.4	10760.9	8948.6
ENSG00000115661	STK16	-0.443828	7.81017e-09	-0.368667	4.15593e-06	0.0751607	0.286205	511.454	378.936	395.346
ENSG00000100802	C14orf93	-0.733937	8.10716e-09	-0.938748	2.59099e-13	-0.20481	0.0588769	336.608	186.297	160.5
ENSG00000089009	RPL6	-0.642017	8.2262e-09	-0.813805	3.999e-13	-0.171789	0.067803	25871.3	17811.6	15749.3
ENSG00000198642	KLHL9	0.485756	8.66901e-09	0.46888	6.3418e-08	-0.0168761	0.865829	767.087	1243.39	1209.54
ENSG00000198839	ZNF277	-0.828382	8.6761e-09	-0.743659	5.73773e-07	0.0847224	0.569631	359.436	206.081	231.237
ENSG00000125675	GRIA3	1.29214	8.82869e-09	0.943852	6.8233e-05	-0.348284	0.0743328	138.355	410.298	303.57
ENSG00000167996	FTH1	-0.691161	9.18853e-09	-0.690643	2.11012e-08	0.000517776	0.99758	42597.2	25718.1	26007.1
ENSG00000137872	SEMA6D	1.05014	9.3083e-09	1.12477	1.42169e-09	0.0746388	0.707751	134.661	279.279	308.354
ENSG00000168661	ZNF30	1.09634	9.57715e-09	1.16016	2.45682e-09	0.06382	0.756492	41.4169	100.589	98.3247
ENSG00000133048	CHI3L1	-1.6708	9.65006e-09	-2.0222	5.32185e-12	-0.3514	0.21409	557595	126974	93130.6
ENSG00000138764	CCNG2	-0.951498	9.65006e-09	-1.07693	1.47695e-10	-0.125431	0.444114	1811.7	918.289	891.473
ENSG00000159388	BTG2	-1.57684	9.67905e-09	-2.08111	4.22497e-14	-0.504261	0.0381274	11622.8	2821.17	2114.14
ENSG00000034713	GABARAPL2	0.531171	9.89547e-09	0.379208	0.000111894	-0.151962	0.0478799	2043.59	3574.2	3139.12
ENSG00000171385	KCND3	-1.3504	9.89547e-09	-1.58713	2.66554e-11	-0.236733	0.300486	686.434	223.171	198.351
ENSG00000168679	SLC16A4	0.723147	9.92382e-09	0.641514	8.8477e-07	-0.0816328	0.512243	447.549	742.198	738.58
ENSG00000189077	TMEM120A	-0.737002	9.92382e-09	-0.787268	1.85501e-09	-0.050266	0.723762	945.358	590.968	544.656
ENSG00000117594	HSD11B1	-1.82549	1.02611e-08	-1.89701	5.04455e-09	-0.071514	0.866432	929.893	194.906	191.8
ENSG00000180801	ARSJ	0.787356	1.06999e-08	0.749312	1.21564e-07	-0.0380446	0.806796	505.071	961.859	923.151
ENSG00000025039	RRAGD	-1.09679	1.075e-08	-0.991796	5.57004e-07	0.104996	0.605868	536.413	319.718	334.468
ENSG00000123349	PFDN5	-0.69994	1.07759e-08	-0.847653	6.8307e-12	-0.147713	0.173581	10118.4	6418.72	5795.46
ENSG00000168917	SLC35G2	0.81678	1.10001e-08	0.590142	9.5117e-05	-0.226638	0.0565785	236.98	491.83	401.839
ENSG00000205060	SLC35B4	0.747511	1.10457e-08	0.803116	1.60716e-09	0.0556056	0.690033	365.187	628.18	668.708
ENSG00000181004	BBS12	0.708581	1.15207e-08	0.880704	1.71419e-12	0.172123	0.0948351	160.027	278.777	306.99
ENSG00000146859	TMEM140	-0.979331	1.15714e-08	-0.841702	2.30673e-06	0.137629	0.414706	306.899	160.076	171.812
ENSG00000100316	RPL3	-0.643175	1.16955e-08	-0.891763	2.82949e-15	-0.248588	0.00550368	46763.3	31470.2	26131.5
ENSG00000112576	CCND3	-0.88873	1.2039e-08	-0.999604	2.63626e-10	-0.110874	0.475052	1812.91	896.201	844.5
ENSG00000107789	MINPP1	0.727394	1.21176e-08	0.657324	6.22068e-07	-0.0700705	0.587327	241.205	468.041	455.493
ENSG00000096384	HSP90AB1	-0.552527	1.27553e-08	-0.719065	1.78796e-13	-0.166538	0.0378984	20074.1	14609.3	13253.2
ENSG00000181789	COPG1	0.504952	1.28017e-08	0.334138	0.000427518	-0.170814	0.0171036	2984.78	4505.28	3724.94
ENSG00000079841	RIMS1	1.67794	1.3366e-08	1.60051	1.18226e-07	-0.0774305	0.82178	11.9237	48.497	40.1886
ENSG00000115760	BIRC6	0.615039	1.37037e-08	0.573471	2.8231e-07	-0.0415684	0.726031	1133.32	1730.23	1660.38
ENSG00000157514	TSC22D3	-1.24276	1.3772e-08	-1.00569	1.07654e-05	0.237071	0.249932	12994.9	4836.2	6348.24
ENSG00000105819	PMPCB	-0.511727	1.38997e-08	-0.573828	3.54719e-10	-0.0621003	0.483837	1081.5	780.396	766.063
ENSG00000089351	GRAMD1A	-0.506533	1.40237e-08	-0.705629	3.0338e-15	-0.199097	0.00492292	1094.3	697.686	590.863
ENSG00000106819	ASPN	1.83239	1.41339e-08	2.38859	1.5864e-13	0.556208	0.0650482	3929.92	24011.1	38605.1
ENSG00000110711	AIP	-0.510877	1.46145e-08	-0.607276	2.70164e-11	-0.0963993	0.237721	1362.6	880.364	810.549
ENSG00000164346	NSA2	-0.839506	1.54291e-08	-0.753861	8.94919e-07	0.0856451	0.57597	3212.22	1711.57	1949.8
ENSG00000118898	PPL	-1.79635	1.61449e-08	-0.474179	0.229177	1.32217	3.91907e-07	197.191	39.2643	123.826
ENSG00000125826	RBCK1	-0.528689	1.62553e-08	-0.587369	6.38992e-10	-0.0586804	0.532603	942.395	591.397	571.838
ENSG00000153823	PID1	0.966963	1.69129e-08	0.816817	4.56254e-06	-0.150145	0.360038	1420.19	3231.86	2953.2
ENSG00000179583	CIITA	-1.80623	1.69129e-08	-0.274399	0.536346	1.53183	4.01799e-09	111.716	23.8583	69.4777
ENSG00000174444	RPL4	-0.674201	1.76601e-08	-0.851574	1.52069e-12	-0.177373	0.0816358	52754	34050.5	30203.5
ENSG00000174744	BRMS1	-0.577903	1.80092e-08	-0.450665	2.79709e-05	0.127238	0.159873	511.058	311.471	326.651
ENSG00000155307	SAMSN1	-2.33604	1.81848e-08	-0.0897634	0.895858	2.24628	3.64479e-09	45.8604	3.52586	27.553
ENSG00000128016	ZFP36	-1.39603	1.86117e-08	-1.63166	7.37259e-11	-0.235633	0.333871	10303	3158.83	2773.75
ENSG00000157404	KIT	-1.98469	1.88857e-08	-2.22186	4.44094e-10	-0.237169	0.564793	700.755	109.684	89.3572
ENSG00000029364	SLC39A9	0.484825	1.90658e-08	0.455676	2.91337e-07	-0.0291485	0.759173	1089.21	1720.9	1614.34
ENSG00000113966	ARL6	0.799913	1.94443e-08	0.765883	1.53206e-07	-0.0340299	0.829784	93.2105	181.491	165.175
ENSG00000121578	B4GALT4	0.563593	2.03631e-08	0.376154	0.000450329	-0.187439	0.0203202	710.134	1177.35	1005.98
ENSG00000074696	PTPLAD1	0.51725	2.06478e-08	0.459668	1.48084e-06	-0.0575817	0.528795	1105.2	1795.27	1698.97
ENSG00000175137	SH3BP5L	0.644499	2.06684e-08	0.76325	4.68091e-11	0.118751	0.246535	292.647	424.783	439.732
ENSG00000182240	BACE2	-0.960304	2.1104e-08	-0.832425	2.8029e-06	0.12788	0.450087	1331.19	692.238	776.397
ENSG00000106809	OGN	1.62348	2.13993e-08	1.61672	4.85974e-08	-0.00675437	0.986166	11811.8	53653.2	56036.5
ENSG00000125691	RPL23	-0.723942	2.247e-08	-0.837654	1.56024e-10	-0.113712	0.35226	21580.6	14319.5	13104.6
ENSG00000100814	CCNB1IP1	-1.02633	2.32208e-08	-1.42773	7.59408e-15	-0.401398	0.00715007	2448.5	1264.88	935.57
ENSG00000171451	DSEL	0.928469	2.35598e-08	1.08046	1.18799e-10	0.151991	0.3251	197.102	429.534	484.825
ENSG00000262102	DSEL	0.928469	2.35598e-08	1.08046	1.18799e-10	0.151991	0.3251	197.102	429.534	484.825
ENSG00000145425	RPS3A	-0.801168	2.51327e-08	-0.965184	2.80991e-11	-0.164016	0.204343	45184.5	29067	25417.9
ENSG00000151348	EXT2	0.538456	2.62626e-08	0.412356	5.01858e-05	-0.1261	0.130426	1894.03	3076.26	2668.22
ENSG00000101096	NFATC2	1.59421	2.62909e-08	1.73562	2.28814e-09	0.141407	0.664752	714.671	2310.74	2627.78
ENSG00000188501	LCTL	1.71809	2.63313e-08	1.54111	1.33989e-06	-0.176975	0.590061	16.3019	58.7637	52.2875
ENSG00000162396	PARS2	0.813836	2.7091e-08	0.772137	2.91257e-07	-0.0416983	0.775315	30.436	54.1791	51.6983
ENSG00000034677	RNF19A	-0.771715	2.78802e-08	-0.468547	0.00175326	0.303168	0.00630496	874.835	463.951	598.181
ENSG00000135686	KLHL36	-0.61777	2.81609e-08	-0.620953	5.03329e-08	-0.00318355	0.982003	682.953	412.171	407.9
ENSG00000118705	RPN2	0.659656	2.96362e-08	0.44925	0.000389576	-0.210406	0.0313863	5611.03	9342.36	7866.42
ENSG00000158008	EXTL1	1.62218	2.96362e-08	1.42211	2.54087e-06	-0.200064	0.525518	456.005	1798.46	1248.18
ENSG00000274180	NATD1	-0.68221	2.96362e-08	-0.503281	0.000103156	0.178929	0.0901252	259.086	147.409	170.159
ENSG00000083857	FAT1	0.997434	3.06452e-08	1.11068	1.16143e-09	0.113249	0.537729	1886.22	3676.1	3792.84
ENSG00000172059	KLF11	-0.974613	3.06452e-08	-0.821406	7.02812e-06	0.153207	0.366673	449.428	213.683	259.129
ENSG00000115685	PPP1R7	-0.381445	3.09309e-08	-0.337391	2.24511e-06	0.0440535	0.516665	866.575	723.227	740.673
ENSG00000187792	ZNF70	0.708729	3.12059e-08	0.556696	3.38556e-05	-0.152033	0.169926	225.025	382.128	338.43
ENSG00000124226	RNF114	-0.667141	3.14071e-08	-0.87359	5.22804e-13	-0.206449	0.0387361	1667.37	1083.09	938.247
ENSG00000124249	KCNK15	-1.41241	3.15484e-08	-1.6654	1.02212e-10	-0.252992	0.318654	297.122	81.2156	56.0593
ENSG00000198604	BAZ1A	-0.946274	3.18944e-08	-0.733443	4.30332e-05	0.21283	0.162943	814.336	435.545	535.093
ENSG00000161509	GRIN2C	1.69487	3.21146e-08	1.39611	1.17152e-05	-0.298754	0.333664	51.2363	218.549	146.079
ENSG00000143878	RHOB	-1.06584	3.27573e-08	-1.26704	7.30703e-11	-0.2012	0.262793	14919	6735.4	6647.3
ENSG00000187514	PTMA	-0.558278	3.37435e-08	-0.345329	0.001515	0.212949	0.00813456	15349.8	10487.3	12303.2
ENSG00000196247	ZNF107	0.926208	3.39157e-08	0.628386	0.000431476	-0.297822	0.0299758	167.492	372.729	319.857
ENSG00000170266	GLB1	0.58134	3.42109e-08	0.596574	2.9344e-08	0.015234	0.907224	817.592	1213.34	1175.64
ENSG00000138606	SHF	-0.647797	3.45143e-08	-0.616187	3.33095e-07	0.0316096	0.813561	198.519	125.804	132.7
ENSG00000253797	UTP14C	0.607807	3.47563e-08	0.632293	1.84633e-08	0.0244867	0.849004	742.816	1214.16	1226.5
ENSG00000172354	GNB2	-0.583939	3.47859e-08	-0.592209	4.55978e-08	-0.00826956	0.951718	2739.92	1724.3	1665.93
ENSG00000165359	DDX26B	0.70581	3.47929e-08	0.452209	0.000980091	-0.253602	0.0131612	427.74	677.532	559.488
ENSG00000137338	PGBD1	0.667202	3.48729e-08	0.69864	1.44621e-08	0.0314382	0.804348	67.2538	106.255	107.532
ENSG00000162772	ATF3	-1.6468	3.53591e-08	-1.26342	5.36552e-05	0.383385	0.18371	249.161	82.9437	90.2696
ENSG00000090339	ICAM1	-1.02485	3.5487e-08	-1.26479	1.38024e-11	-0.239941	0.147512	5160.99	2070.02	1786.64
ENSG00000160712	IL6R	-1.02721	3.5487e-08	-1.21291	1.12943e-10	-0.185698	0.289419	1441.39	644.167	545.978
ENSG00000101017	CD40	-1.11775	3.5767e-08	-1.24534	1.38894e-09	-0.127587	0.544804	564.906	247.257	226.939
ENSG00000152990	GPR125	0.820704	3.58641e-08	0.744955	1.29844e-06	-0.0757495	0.628305	1055.75	1980.92	1781.8
ENSG00000278270	RPS9	-1.17908	3.58641e-08	-1.13377	2.49139e-07	0.0453139	0.86477	713.922	315.695	310.498
ENSG00000166888	STAT6	-0.694768	3.59544e-08	-0.589086	7.01539e-06	0.105682	0.378839	3047.37	1684.94	1892.24
ENSG00000013016	EHD3	1.05247	3.85374e-08	1.00906	2.89737e-07	-0.0434111	0.8498	369.37	894.873	746.251
ENSG00000105643	ARRDC2	-0.753991	3.85374e-08	-0.713816	4.28744e-07	0.040175	0.796087	1170.44	592.289	640.581
ENSG00000148300	REXO4	-0.47945	3.85542e-08	-0.528875	2.56896e-09	-0.0494246	0.578905	220.153	155.736	151.42
ENSG00000196611	MMP1	-2.35626	3.85542e-08	-0.861972	0.0811551	1.49429	0.000460884	215.901	10.6217	51.7485
ENSG00000280706	REXO4	-0.47945	3.85542e-08	-0.528875	2.56896e-09	-0.0494246	0.578905	220.153	155.736	151.42
ENSG00000177575	CD163	-2.06753	3.91193e-08	-0.119294	0.845598	1.94824	1.63229e-09	1825.7	160.321	842.659
ENSG00000180917	CMTR2	0.797599	3.92804e-08	0.924494	2.85675e-10	0.126894	0.34392	177.102	299.354	326.573
ENSG00000177600	RPLP2	-0.813428	3.93889e-08	-1.09936	1.27757e-13	-0.285935	0.0181472	13725.4	7874.26	6269.35
ENSG00000157613	CREB3L1	-1.39642	4.00007e-08	-0.625511	0.0291584	0.770904	0.000162448	466.658	149.143	246.989
ENSG00000142937	RPS8	-0.630776	4.0015e-08	-0.789878	8.20762e-12	-0.159102	0.107154	24409.4	17549	15461.8
ENSG00000233927	RPS28	-0.892337	4.0015e-08	-1.2314	3.53511e-14	-0.339061	0.00999868	7166.74	3800.02	2870.6
ENSG00000119383	PPP2R4	0.587833	4.02772e-08	0.350512	0.00251374	-0.237321	0.0048567	1906.66	2916.77	2347.36
ENSG00000054654	SYNE2	-1.00092	4.03001e-08	-0.770892	5.6688e-05	0.230026	0.15901	718.846	335.492	402.958
ENSG00000143512	HHIPL2	1.05202	4.03001e-08	0.673247	0.00105483	-0.378773	0.0166427	1405.79	2808.97	2296.2
ENSG00000164929	BAALC	1.66815	4.06337e-08	1.29571	4.6638e-05	-0.372446	0.205892	160.769	796.814	511.73
ENSG00000237515	SHISA9	1.40057	4.0695e-08	0.873756	0.00144969	-0.526816	0.0113716	30.1541	77.3637	62.3088
ENSG00000171858	RPS21	-0.885207	4.0882e-08	-1.12026	4.98918e-12	-0.235054	0.0911923	6909.12	4036.1	3212.39
ENSG00000147604	RPL7	-0.781571	4.26513e-08	-0.927523	1.17428e-10	-0.145952	0.264921	31275	20722.4	18657.2
ENSG00000114416	FXR1	-0.516255	4.30069e-08	-0.534517	2.82331e-08	-0.0182618	0.872451	2369.16	1762.48	1742.53
ENSG00000171617	ENC1	1.36564	4.30069e-08	1.40602	3.2415e-08	0.0403807	0.899683	133.085	410.631	394.337
ENSG00000257704	INAFM1	-0.721715	4.30069e-08	-0.917861	4.39792e-12	-0.196147	0.0840971	303.155	155.135	139.282
ENSG00000131143	COX4I1	-0.557831	4.33675e-08	-0.520194	7.36255e-07	0.0376378	0.737511	3188.49	2102.98	2090.71
ENSG00000198954	KIAA1279	0.559662	4.38631e-08	0.242161	0.0376824	-0.317501	3.02986e-05	790.571	1300.58	1046.04
ENSG00000100095	SEZ6L	1.7573	4.60122e-08	1.40205	2.89974e-05	-0.355253	0.259497	23.0829	89.3754	72.8056
ENSG00000003402	CFLAR	-0.899132	4.6485e-08	-0.569991	0.00125394	0.329142	0.0142491	1849.44	975.312	1240.01
ENSG00000204070	SYS1	-0.63294	4.6485e-08	-0.615547	2.37107e-07	0.0173931	0.904806	421.673	263.988	260.127
ENSG00000091527	CDV3	-0.625111	4.83782e-08	-0.565416	1.79926e-06	0.0596958	0.615392	2616.35	1818.93	1837.91
ENSG00000179632	MAF1	-0.449881	5.2211e-08	-0.471742	2.1658e-08	-0.0218611	0.815222	1695.11	1133.24	1122.14
ENSG00000125144	MT1G	-1.9892	5.34039e-08	-2.24382	1.12806e-09	-0.254611	0.550971	4529.03	743.052	749.097
ENSG00000166228	PCBD1	-0.892847	5.34039e-08	-0.743106	1.34451e-05	0.149741	0.336613	359.306	171.776	204.199
ENSG00000131469	RPL27	-0.69756	5.41616e-08	-0.758094	6.23501e-09	-0.0605336	0.655871	11990.6	8634.65	8073.94
ENSG00000114942	EEF1B2	-0.779262	5.4369e-08	-0.99738	4.29685e-12	-0.218119	0.0728045	15199.7	8914.07	7913.44
ENSG00000137831	UACA	-0.89157	5.46579e-08	-0.94364	1.64261e-08	-0.0520702	0.778895	3736.42	1786.76	1777.2
ENSG00000266524	GDF10	1.46158	5.59276e-08	0.948506	0.00098002	-0.513072	0.0283308	7532.33	22994	14909.7
ENSG00000111913	FAM65B	-2.00957	5.79926e-08	-1.43007	0.000238905	0.579492	0.12527	109.686	20.0225	18.484
ENSG00000034533	ASTE1	0.851086	5.8939e-08	0.858711	8.30665e-08	0.00762503	0.969406	86.5035	171.148	162.342
ENSG00000269374	CTB-50E14.5	-1.50126	5.89965e-08	-1.92958	6.98306e-12	-0.428313	0.109382	61.1218	19.5738	13.2144
ENSG00000137726	FXYD6	0.880402	5.9097e-08	0.680122	6.67333e-05	-0.200281	0.164723	3950.07	7695.56	6389.74
ENSG00000120251	GRIA2	1.7553	5.91109e-08	1.61957	1.11935e-06	-0.135732	0.724523	28.0871	124.285	116.972
ENSG00000196305	IARS	0.564308	5.93128e-08	0.649893	6.67075e-10	0.0855854	0.383568	1265.55	2001.24	2032.71
ENSG00000146197	SCUBE3	1.91251	6.02362e-08	1.66144	5.08279e-06	-0.251068	0.525385	20.4468	144.472	87.7136
ENSG00000158195	WASF2	-0.482147	6.17818e-08	-0.47921	1.52915e-07	0.00293658	0.979554	4545.03	3276.1	3356.29
ENSG00000186184	POLR1D	-0.807988	6.27931e-08	-1.03333	5.59457e-12	-0.225338	0.0767694	1595.61	980.277	847.487
ENSG00000196917	HCAR1	1.17763	6.3851e-08	0.728751	0.00193934	-0.448883	0.00658488	21.7657	60.5455	44.5756
ENSG00000132676	DAP3	-0.466375	6.48882e-08	-0.441268	6.80005e-07	0.0251074	0.794229	1097.74	837.607	848.433
ENSG00000064666	CNN2	-1.22532	6.58804e-08	-1.12292	1.58307e-06	0.1024	0.684678	975.885	316.895	364.085
ENSG00000117479	SLC19A2	-0.963082	6.65095e-08	-0.91444	6.1219e-07	0.0486416	0.814449	242.749	131.118	143.798
ENSG00000177125	ZBTB34	0.579584	6.66528e-08	0.78645	1.8013e-13	0.206866	0.00961013	102.554	166.293	188.766
ENSG00000170889	RPS9	-1.1911	6.76087e-08	-1.09785	1.40641e-06	0.093248	0.706936	686.069	308.211	304.199
ENSG00000100284	TOM1	-0.612908	6.77013e-08	-0.698192	1.26811e-09	-0.0852847	0.437925	1832.93	1069.86	996.772
ENSG00000186468	RPS23	-0.733754	6.81134e-08	-0.926461	1.20424e-11	-0.192707	0.0986147	23618.1	15352.4	13267.3
ENSG00000104331	IMPAD1	0.577304	7.20605e-08	0.648475	2.39631e-09	0.0711717	0.498667	1711.85	3008.3	3100.27
ENSG00000165113	GKAP1	-0.80809	7.25362e-08	-0.914794	1.69235e-09	-0.106705	0.478538	99.6301	56.6252	54.1947
ENSG00000055813	CCDC85A	1.1233	7.37664e-08	0.732865	0.00103301	-0.39044	0.0251449	443.978	1149.12	938.076
ENSG00000184113	CLDN5	-2.04474	7.65728e-08	-1.56327	8.22865e-05	0.481464	0.237203	169.638	23.1697	43.5084
ENSG00000167995	BEST1	-1.32098	7.72824e-08	-1.5108	1.23314e-09	-0.189815	0.450505	304.061	109.096	96.4296
ENSG00000118181	RPS25	-0.803	7.75309e-08	-1.08815	3.39924e-13	-0.285147	0.0195655	15127.4	8973.19	7908
ENSG00000280831	RPS25	-0.803	7.75309e-08	-1.08815	3.39924e-13	-0.285147	0.0195655	15127.4	8973.19	7908
ENSG00000019505	SYT13	1.83817	7.98576e-08	2.43276	1.00651e-12	0.594591	0.0621014	29.4333	153.323	236.269
ENSG00000163083	INHBB	-2.0431	8.06649e-08	-0.418981	0.39863	1.62412	1.21112e-06	68.1921	6.3566	21.8313
ENSG00000145730	PAM	0.733764	8.12864e-08	0.459679	0.00179301	-0.274084	0.0129426	14445.9	25790.7	21208.7
ENSG00000122218	COPA	0.405588	8.21126e-08	0.350098	8.30076e-06	-0.0554896	0.445108	4482.23	6152.04	5681.8
ENSG00000204161	C10orf128	-2.22492	8.21126e-08	-0.32655	0.575011	1.89837	6.69784e-07	106.498	8.00976	52.2529
ENSG00000105755	ETHE1	-0.821535	8.86175e-08	-0.48055	0.00391387	0.340985	0.0055642	245.377	134.546	167.953
ENSG00000065485	PDIA5	0.836365	8.89211e-08	0.930276	4.44352e-09	0.0939111	0.552029	496.209	876.976	882.098
ENSG00000106571	GLI3	0.828804	8.89227e-08	0.883522	2.14492e-08	0.054718	0.751546	1998.09	3824.41	4232.02
ENSG00000128268	MGAT3	1.66614	9.00184e-08	1.32675	4.55695e-05	-0.339386	0.266342	39.7959	172.954	119.43
ENSG00000144648	ACKR2	1.40801	9.04299e-08	1.37225	3.57326e-07	-0.0357605	0.917639	58.3428	168.664	187.896
ENSG00000067066	SP100	-0.529383	9.27775e-08	-0.455452	9.67486e-06	0.0739317	0.438577	1171.15	876.235	938.978
ENSG00000127415	IDUA	0.759175	9.42908e-08	0.595404	6.53491e-05	-0.163772	0.192941	318.144	409.448	368.672
ENSG00000151353	TMEM18	-0.585399	9.43315e-08	-0.685943	5.98514e-10	-0.100544	0.324964	744.931	509.937	471.907
ENSG00000123096	SSPN	0.852234	9.70625e-08	0.677887	5.09905e-05	-0.174347	0.228801	2133.37	4136.23	3796.65
ENSG00000115361	ACADL	-1.60808	9.71998e-08	-2.15735	8.26432e-13	-0.549271	0.0450093	442.101	98.0161	60.0267
ENSG00000138311	ZNF365	0.889193	9.71998e-08	0.792308	4.33564e-06	-0.0968848	0.565783	186.676	386.076	364.4
ENSG00000158156	XKR8	0.779522	9.71998e-08	0.891741	1.57364e-09	0.112218	0.415666	161.389	262.708	278.152
ENSG00000198918	RPL39	-0.823078	9.71998e-08	-0.951869	1.06328e-09	-0.128792	0.383213	11860.4	8145.14	7349.41
ENSG00000196693	ZNF33B	-1.18319	9.75926e-08	-1.35788	1.44788e-09	-0.1747	0.432035	727.672	308.856	272.082
ENSG00000135926	TMBIM1	-0.91222	9.87525e-08	-0.892286	3.7801e-07	0.0199349	0.927876	10042.8	4708.64	4712.51
ENSG00000205502	C2CD4B	-2.35674	1.02395e-07	-1.56585	0.000691151	0.79089	0.139086	12.8835	0.442636	1.52443
ENSG00000115652	UXS1	0.574123	1.02504e-07	0.400812	0.000468838	-0.173311	0.0515181	976.51	1612.97	1426.64
ENSG00000001497	LAS1L	-0.464539	1.04759e-07	-0.619703	1.45557e-12	-0.155164	0.0298065	990.542	681.284	618.077
ENSG00000164292	RHOBTB3	-0.999886	1.05204e-07	-1.2813	1.1001e-11	-0.281411	0.0833556	4358.39	2496.02	2023.01
ENSG00000112697	TMEM30A	0.580959	1.05521e-07	0.521714	3.91507e-06	-0.0592443	0.595757	3200.57	5838.29	5774.31
ENSG00000157150	TIMP4	-1.15939	1.05782e-07	-1.45057	3.5262e-11	-0.291187	0.135812	4474.89	1756.76	1425.94
ENSG00000141401	IMPA2	-1.01966	1.06595e-07	-1.15043	3.75046e-09	-0.130775	0.506032	123.863	61.81	58.84
ENSG00000160999	SH2B2	-1.36874	1.06595e-07	-1.14231	1.88165e-05	0.226436	0.393477	50.7329	17.3902	20.4004
ENSG00000126756	UXT	-0.6661	1.08943e-07	-0.812562	1.23555e-10	-0.146462	0.188244	1334.88	884.852	809.723
ENSG00000105656	ELL	-0.92032	1.09558e-07	-0.867905	1.14653e-06	0.0524148	0.790887	463.458	188.42	196.677
ENSG00000129083	COPB1	0.436743	1.11116e-07	0.528025	1.89474e-10	0.0912822	0.208918	2147.73	3279.34	3395.39
ENSG00000136261	BZW2	-0.848645	1.1239e-07	-0.484483	0.0054322	0.364162	0.00419887	435.121	272.348	322.802
ENSG00000164587	RPS14	-0.799577	1.12665e-07	-0.96138	2.50434e-10	-0.161802	0.237413	18629.6	10896.2	9430.89
ENSG00000092108	SCFD1	0.528812	1.13145e-07	0.440775	2.19621e-05	-0.0880372	0.339046	1040.94	1697.44	1595.3
ENSG00000163931	TKT	-0.582227	1.15301e-07	-0.430008	0.000210976	0.152219	0.106058	1525.14	954.856	988.183
ENSG00000130595	TNNT3	1.7061	1.16918e-07	1.3673	4.6876e-05	-0.338796	0.300486	384.515	1849.57	1450.57
ENSG00000112280	COL9A1	1.86224	1.19411e-07	1.60297	1.04276e-05	-0.259268	0.512872	1007.92	7784.27	4951.48
ENSG00000076984	MAP2K7	-0.466279	1.21329e-07	-0.585114	4.05712e-11	-0.118834	0.116154	742.887	497.558	469.598
ENSG00000115275	MOGS	0.478427	1.22772e-07	0.366793	0.000116785	-0.111634	0.150325	589.837	755.923	665.689
ENSG00000109917	ZPR1	-0.628555	1.23566e-07	-0.471034	0.000169524	0.157521	0.1245	712.553	464.493	519.744
ENSG00000102897	LYRM1	-0.650052	1.25007e-07	-0.71776	8.75838e-09	-0.0677073	0.590974	459.777	314.589	310.729
ENSG00000165006	UBAP1	-0.523483	1.25979e-07	-0.596521	2.71816e-09	-0.0730376	0.444529	1556.54	1104.32	1043.43
ENSG00000021300	PLEKHB1	1.45066	1.26638e-07	0.943314	0.00132032	-0.507348	0.0341646	380.232	1136.64	668.903
ENSG00000060138	YBX3	-0.845588	1.28995e-07	-0.883889	6.24744e-08	-0.0383017	0.837876	6448.32	3437.74	3405.21
ENSG00000065559	MAP2K4	0.544011	1.30443e-07	0.488369	4.5855e-06	-0.0556415	0.589423	344.355	590.937	534.566
ENSG00000134470	IL15RA	-1.31411	1.31809e-07	-1.16077	6.60547e-06	0.15334	0.568895	108.539	35.4813	38.58
ENSG00000143947	RPS27A	-0.787519	1.32365e-07	-1.05077	2.02687e-12	-0.263254	0.0327614	28101.8	19028.2	15572.6
ENSG00000149657	LSM14B	-0.358597	1.34337e-07	-0.353973	3.92333e-07	0.00462396	0.957506	532.388	395.43	393.239
ENSG00000169217	CD2BP2	-0.503199	1.36301e-07	-0.495365	4.26221e-07	0.00783418	0.949363	1290.5	909.064	928.465
ENSG00000123144	C19orf43	-0.59752	1.36747e-07	-0.663509	8.07087e-09	-0.0659892	0.565872	2948.78	1802.41	1748.46
ENSG00000143612	C1orf43	-0.491127	1.37343e-07	-0.514718	6.18017e-08	-0.023591	0.824616	3977.94	2870.91	2905.51
ENSG00000076924	XAB2	-0.583222	1.38187e-07	-0.721697	9.51807e-11	-0.138475	0.15381	947.271	537.961	489.008
ENSG00000110079	MS4A4A	-2.12935	1.44103e-07	-0.0171513	0.982046	2.1122	4.51343e-09	207.322	17.253	113.209
ENSG00000119401	TRIM32	0.475697	1.44103e-07	0.479849	2.16271e-07	0.00415203	0.9704	192.863	266.817	256.382
ENSG00000129636	ITFG1	0.595017	1.44367e-07	0.533482	5.08279e-06	-0.0615352	0.5932	1507.62	2371.63	2340.79
ENSG00000130717	UCK1	-0.464438	1.45744e-07	-0.529149	3.42682e-09	-0.0647113	0.448684	682.387	468.118	435.663
ENSG00000167779	IGFBP6	-1.15088	1.5351e-07	-1.08345	1.57517e-06	0.0674324	0.789675	7090.3	2310.83	2367.5
ENSG00000143153	ATP1B1	0.951433	1.54681e-07	0.754224	7.16614e-05	-0.197209	0.233005	872.882	2049.06	1741.61
ENSG00000185670	ZBTB3	1.01417	1.54821e-07	0.759017	0.000206948	-0.255148	0.107677	28.8192	60.6738	44.092
ENSG00000198863	RUNDC1	0.468411	1.65833e-07	0.413466	8.12128e-06	-0.0549454	0.520263	231.656	321.545	302.372
ENSG00000115970	THADA	-1.06761	1.67927e-07	-1.03524	7.66258e-07	0.0323646	0.900512	1211.95	543.092	547.841
ENSG00000107968	MAP3K8	-0.967817	1.74616e-07	-0.975756	2.60734e-07	-0.00793913	0.974313	676.28	349.026	372.853
ENSG00000150337	FCGR1A	-2.22327	1.74616e-07	-0.24693	0.692544	1.97634	7.4386e-07	75.9765	3.9869	37.8045
ENSG00000166900	STX3	-0.828149	1.76434e-07	-0.604062	0.000306706	0.224086	0.104482	209.972	111.525	123.705
ENSG00000116221	MRPL37	-0.429224	1.76463e-07	-0.363603	2.08267e-05	0.0656212	0.398507	710.649	523.803	546.296
ENSG00000115525	ST3GAL5	-1.18256	1.79867e-07	-1.0133	1.60643e-05	0.169256	0.462102	198	72.7195	81.4913
ENSG00000125037	EMC3	-0.456981	1.80776e-07	-0.274508	0.00380302	0.182473	0.00834931	1089.63	864.162	925.808
ENSG00000135390	ATP5G2	-0.550941	1.81265e-07	-0.722415	8.48982e-12	-0.171474	0.0501265	3271.37	2325	2037.33
ENSG00000127993	RBM48	0.557437	1.84618e-07	0.439958	8.32697e-05	-0.11748	0.193869	152.061	229.233	224.982
ENSG00000223656	HMGB3P10	1.77121	1.87241e-07	1.85523	5.35613e-08	0.0840187	0.809851	2.06814	9.92179	11.6827
ENSG00000139178	C1RL	-0.718284	1.8765e-07	-0.854681	7.70677e-10	-0.136396	0.281633	2795.2	1636.27	1524.34
ENSG00000205362	MT1A	-1.46222	1.90275e-07	-1.64708	6.70718e-09	-0.184867	0.543214	264.225	64.4899	73.7634
ENSG00000115649	CNPPD1	-0.409613	1.96651e-07	-0.339078	3.61573e-05	0.0705345	0.332883	811.84	581.21	599.71
ENSG00000173848	NET1	-0.889231	1.97593e-07	-0.969636	2.34471e-08	-0.0804052	0.659348	6910.59	3781.89	3874.71
ENSG00000180332	KCTD4	1.26745	2.07025e-07	0.814916	0.00183484	-0.452535	0.0274214	103.454	294.614	209.066
ENSG00000198933	TBKBP1	-0.639669	2.11073e-07	-0.889726	5.19138e-13	-0.250057	0.011979	526.824	297.566	265.452
ENSG00000151461	UPF2	-0.445961	2.11787e-07	-0.403681	5.34611e-06	0.0422803	0.636334	1192.04	981.778	1003.48
ENSG00000171105	INSR	-0.729539	2.18515e-07	-0.958596	1.06154e-11	-0.229057	0.0518931	936.876	566.721	467.792
ENSG00000131778	CHD1L	0.51539	2.21073e-07	0.483625	2.30491e-06	-0.0317648	0.769893	508.058	739.731	707.498
ENSG00000173926	MARCH3	-1.18719	2.24241e-07	-1.47613	1.44303e-10	-0.288942	0.167812	522.453	192.246	151.809
ENSG00000170801	HTRA3	1.16039	2.24531e-07	0.807786	0.000688694	-0.352603	0.0688017	731.01	1735.09	1363.65
ENSG00000139219	COL2A1	1.99714	2.2642e-07	1.72645	1.40858e-05	-0.270691	0.556871	85742.2	883820	528469
ENSG00000131779	PEX11B	0.553728	2.26826e-07	0.486182	1.12737e-05	-0.0675459	0.510806	245.258	369.612	355.366
ENSG00000102103	PQBP1	-0.517979	2.27323e-07	-0.661739	4.39512e-11	-0.14376	0.0903535	909.007	583.461	527.073
ENSG00000118579	MED28	-0.661351	2.3003e-07	-0.433287	0.00155702	0.228065	0.0293472	865.422	570.387	640.927
ENSG00000157379	DHRS1	0.679112	2.32801e-07	0.412407	0.00375571	-0.266705	0.0097177	193.328	278.576	224.619
ENSG00000069011	PITX1	-0.877067	2.35272e-07	-1.12906	3.18307e-11	-0.251988	0.0842044	1006.05	424.777	354.227
ENSG00000250067	YJEFN3	1.23306	2.35879e-07	0.846773	0.000846171	-0.386286	0.0535651	38.9022	87.9189	68.2366
ENSG00000123562	MORF4L2	0.445766	2.36428e-07	0.305195	0.000900738	-0.14057	0.0473477	4733.75	7158.97	6278.19
ENSG00000132872	SYT4	2.00556	2.37376e-07	2.23416	9.40559e-09	0.228604	0.596993	1.93336	22.6649	25.0215
ENSG00000136828	RALGPS1	1.05346	2.37443e-07	0.758095	0.0004416	-0.295365	0.0925629	222.257	482.758	436.426
ENSG00000089063	TMEM230	0.393005	2.39351e-07	0.217834	0.00896713	-0.175171	0.00276415	1793.18	2708.81	2527.29
ENSG00000124214	STAU1	-0.462645	2.41533e-07	-0.381549	4.47759e-05	0.081096	0.3269	2339.46	1747.06	1852.34
ENSG00000167515	TRAPPC2L	-0.665398	2.42304e-07	-0.699013	1.06391e-07	-0.0336145	0.819617	752.529	457.364	427.011
ENSG00000180787	ZFP3	0.707612	2.44759e-07	0.578888	5.00052e-05	-0.128723	0.29189	128.528	186.409	185.673
ENSG00000112299	VNN1	-1.99295	2.45344e-07	-0.0762594	0.904585	1.91669	1.10673e-08	21.1442	3.30449	16.7675
ENSG00000141696	P3H4	0.964968	2.49219e-07	0.886735	4.28784e-06	-0.078233	0.701939	1076.55	1992.38	1750.29
ENSG00000197816	CCDC180	0.737183	2.49364e-07	0.473334	0.00203474	-0.263849	0.0209643	170.191	247.45	203.257
ENSG00000132514	CLEC10A	-2.25258	2.52192e-07	-0.788376	0.12106	1.46421	0.00099471	48.934	1.92438	10.1692
ENSG00000165030	NFIL3	-1.19427	2.52532e-07	-1.41599	1.29859e-09	-0.221723	0.320151	1334.92	628.03	531.537
ENSG00000133597	ADCK2	-0.765905	2.60323e-07	-0.525038	0.000908728	0.240867	0.0541685	232.781	132.634	152.241
ENSG00000172888	ZNF621	0.476575	2.66511e-07	0.476485	5.06742e-07	-9.02299e-05	0.999364	370.497	500.231	493.423
ENSG00000235447	TRAPPC13P1	2.07279	2.6727e-07	1.05786	0.0183292	-1.01493	0.00168732	0.524789	7.36741	3.14505
ENSG00000166979	EVA1C	-0.910119	2.68758e-07	-0.977749	5.69362e-08	-0.0676304	0.732198	278.944	152.016	149.206
ENSG00000183150	GPR19	1.2275	2.69109e-07	0.935579	0.00019216	-0.291916	0.151725	22.9596	63.2324	54.2274
ENSG00000179820	MYADM	0.872415	2.72552e-07	1.2264	4.03669e-13	0.353987	0.00953041	2481.79	3920.39	5014.22
ENSG00000160256	FAM207A	-0.629887	2.73027e-07	-0.592749	2.63158e-06	0.0371385	0.787396	176.983	98.2993	103.692
ENSG00000198695	MT-ND6	1.09055	2.73179e-07	1.16149	7.31173e-08	0.0709366	0.768731	475.904	1284.87	1403.25
ENSG00000203710	CR1	-2.1127	2.73179e-07	-1.15877	0.00893263	0.953937	0.0219062	47.374	3.29021	6.7538
ENSG00000171155	C1GALT1C1	0.693126	2.99566e-07	0.968871	6.07295e-13	0.275746	0.00959307	341.702	565.007	704.424
ENSG00000120820	GLT8D2	0.76703	3.05944e-07	0.762585	6.67607e-07	-0.0044447	0.981245	1548.43	2782.7	2765.94
ENSG00000168118	RAB4A	-0.601458	3.07084e-07	-0.615291	2.99749e-07	-0.0138332	0.926233	720.709	499.36	493.808
ENSG00000026025	VIM	-0.691454	3.10318e-07	-0.445986	0.00210153	0.245468	0.0260003	114740	66909.2	81464.9
ENSG00000167118	URM1	-0.407399	3.19531e-07	-0.431168	1.12091e-07	-0.0237693	0.787551	974.623	735.912	722.578
ENSG00000166734	CASC4	0.641386	3.21916e-07	0.585681	6.1576e-06	-0.0557049	0.674783	2898.32	5012.87	4996.44
ENSG00000049089	COL9A2	1.32621	3.26116e-07	0.849232	0.00229743	-0.476976	0.033115	9902.84	28270	16925.2
ENSG00000163219	ARHGAP25	-1.41716	3.26116e-07	-0.541793	0.092835	0.875368	0.000101445	83.0364	25.5846	50.6963
ENSG00000138758	SEPT11	-1.15546	3.27235e-07	-0.340771	0.222021	0.814689	2.44269e-06	1677.35	707.435	1232.07
ENSG00000150990	DHX37	-0.755394	3.27235e-07	-0.655432	1.95351e-05	0.0999622	0.497272	348.234	181.238	185.107
ENSG00000147677	EIF3H	-0.615268	3.29736e-07	-0.811811	1.66626e-11	-0.196543	0.0489989	5955.23	4026.32	3589.76
ENSG00000178878	APOLD1	-1.08533	3.33744e-07	-0.753163	0.000860393	0.33217	0.0719941	257.905	116.224	154.04
ENSG00000176907	C8orf4	-2.24729	3.35921e-07	-0.0752959	0.92054	2.172	5.39571e-07	65.1976	3.67661	39.462
ENSG00000263155	MYZAP	-1.36129	3.37116e-07	-1.32064	1.36575e-06	0.0406451	0.908271	495.773	176.915	177.807
ENSG00000071626	DAZAP1	-0.521417	3.38424e-07	-0.462819	1.21073e-05	0.058598	0.570076	1093.84	719.468	755.496
ENSG00000130592	LSP1	0.962986	3.42192e-07	0.737669	0.000204881	-0.225317	0.18362	7093.85	13468.5	11682.4
ENSG00000004864	SLC25A13	0.500099	3.47196e-07	0.340765	0.00114394	-0.159334	0.0444784	339.545	517.658	459.623
ENSG00000124193	SRSF6	0.469105	3.53211e-07	0.273226	0.00644749	-0.195879	0.0066717	2774.66	3780.18	3414.6
ENSG00000182700	IGIP	0.724323	3.54947e-07	0.530734	0.000417184	-0.19359	0.107755	251.912	482.272	434.991
ENSG00000113621	TXNDC15	0.504088	3.59429e-07	0.406096	8.90204e-05	-0.0979913	0.273704	2291.4	3091.15	2882.55
ENSG00000180098	TRNAU1AP	-0.56722	3.60222e-07	-0.497628	1.64435e-05	0.0695923	0.530681	352.381	247.977	253.635
ENSG00000115561	CHMP3	-0.474899	3.62206e-07	-0.346092	0.000455793	0.128807	0.104137	2998.16	2071.46	2272.23
ENSG00000163754	GYG1	-0.982797	3.62206e-07	-1.01116	2.92536e-07	-0.0283635	0.907943	1530.13	838.716	786.976
ENSG00000205978	NYNRIN	1.02542	3.64466e-07	1.02934	5.94354e-07	0.00391541	0.988067	442.659	877.524	898.305
ENSG00000110680	CALCA	-2.25272	3.67294e-07	-2.05692	4.39622e-06	0.195806	0.772843	31.0761	0.940072	1.26981
ENSG00000102038	SMARCA1	0.496758	3.70805e-07	0.376732	0.000252649	-0.120026	0.155036	1533.49	2410.59	2202.6
ENSG00000137752	CASP1	-1.58836	3.74662e-07	-0.299222	0.475496	1.28914	3.04662e-07	110.96	26.5563	71.3797
ENSG00000153048	CARHSP1	-0.674033	3.77834e-07	-0.764343	1.29074e-08	-0.0903101	0.487847	1522.6	973.07	940.229
ENSG00000184840	TMED9	0.361341	3.82315e-07	0.242742	0.00141858	-0.118599	0.0405444	3633.54	4932.99	4375.76
ENSG00000139329	LUM	0.849472	3.82638e-07	0.898251	1.36079e-07	0.0487789	0.79658	81048.6	168295	186041
ENSG00000125733	TRIP10	-0.718097	3.88959e-07	-0.650138	8.73958e-06	0.0679587	0.649353	1208.56	602.879	637.645
ENSG00000172548	NIPAL4	-2.23563	3.94137e-07	-1.96668	1.14236e-05	0.268942	0.671803	20.242	1.35359	1.58654
ENSG00000068366	ACSL4	-1.03787	3.97409e-07	-0.893799	2.60622e-05	0.144072	0.482504	1937.08	1064.84	1174.2
ENSG00000187446	CHP1	-0.593991	3.98504e-07	-0.31432	0.0151617	0.27967	0.00208995	985.791	676.27	813.043
ENSG00000135636	DYSF	1.29298	4.03304e-07	1.82266	6.78009e-13	0.529686	0.0130214	262.308	625.357	939.436
ENSG00000156976	EIF4A2	-0.602211	4.03304e-07	-0.816547	5.95444e-12	-0.214336	0.026543	11915.7	8550.23	7766.01
ENSG00000178927	C17orf62	-0.617564	4.05792e-07	-0.619672	6.82703e-07	-0.00210771	0.989044	938.276	583.969	620.427
ENSG00000100380	ST13	-0.564006	4.18588e-07	-0.773316	3.63206e-12	-0.20931	0.0199031	9511.43	6518.8	5933.45
ENSG00000254505	CHMP4A	-0.49898	4.21007e-07	-0.541609	6.50903e-08	-0.04263	0.683739	779.883	544.297	535.108
ENSG00000074410	CA12	-1.90381	4.22858e-07	-0.159456	0.785333	1.74435	5.31098e-08	236.493	37.2076	144.561
ENSG00000170382	LRRN2	1.28817	4.25165e-07	1.48376	7.71943e-09	0.195596	0.444412	156.431	383.393	410.248
ENSG00000253729	PRKDC	0.465577	4.36912e-07	0.302451	0.00224106	-0.163125	0.0283423	1800.91	2700.31	2309.43
ENSG00000116406	EDEM3	0.656417	4.38709e-07	0.56669	2.6862e-05	-0.089727	0.477761	1071.35	2137.28	1949.06
ENSG00000171492	LRRC8D	0.800246	4.44307e-07	0.786288	1.30329e-06	-0.0139578	0.945691	283.223	534.655	463.739
ENSG00000187634	SAMD11	1.32223	4.45398e-07	1.05811	0.00011184	-0.264117	0.293345	158.645	491.432	413.71
ENSG00000196542	SPTSSB	1.78655	4.47592e-07	1.40148	0.000150724	-0.385076	0.294791	147.877	725.71	564.489
ENSG00000148841	ITPRIP	-1.19693	4.51536e-07	-0.923044	0.000212049	0.273889	0.212802	2075.86	649.439	845.331
ENSG00000072042	RDH11	0.465519	4.65699e-07	0.598288	9.96463e-11	0.132769	0.0842583	919.271	1340	1421.18
ENSG00000168961	LGALS9	-1.86129	4.66243e-07	0.193192	0.727559	2.05448	5.10949e-11	190.354	19.8278	108.652
ENSG00000135486	HNRNPA1	-0.448043	4.66912e-07	-0.577357	9.09895e-11	-0.129314	0.0832837	24271.3	18836.9	16892.2
ENSG00000140968	IRF8	-1.5877	4.69219e-07	-0.410528	0.301019	1.17717	4.21164e-06	149.336	40.7464	97.1909
ENSG00000173041	ZNF680	0.73425	4.7108e-07	0.51229	0.000936579	-0.22196	0.0635695	172.248	333.059	294.9
ENSG00000119522	DENND1A	-0.611018	4.81641e-07	-0.53247	2.34618e-05	0.0785483	0.512872	391.242	259.181	279.811
ENSG00000100439	ABHD4	-0.716887	4.85972e-07	-0.841235	5.04455e-09	-0.124347	0.353349	1067.2	635.469	551.335
ENSG00000064115	TM7SF3	0.63118	4.89903e-07	0.665597	1.90886e-07	0.0344176	0.805604	599.851	1003	1029
ENSG00000136603	SKIL	0.784713	4.95025e-07	0.835622	1.42874e-07	0.0509094	0.768731	501.674	951.763	1023.18
ENSG00000143226	FCGR2A	-1.40177	5.01912e-07	0.00246692	0.996383	1.40424	9.38923e-11	419.834	130.65	403.33
ENSG00000054392	HHAT	1.02926	5.12001e-07	0.682252	0.00185913	-0.347006	0.043012	203.515	440.117	323.071
ENSG00000280680	HHAT	1.02926	5.12001e-07	0.682252	0.00185913	-0.347006	0.043012	203.515	440.117	323.071
ENSG00000177946	CENPBD1	0.633335	5.20501e-07	0.426013	0.00160163	-0.207323	0.0395254	135.939	210.562	177.073
ENSG00000156171	DRAM2	-0.650492	5.23512e-07	-0.517266	0.00013937	0.133226	0.255527	728.935	525.396	599.32
ENSG00000173545	ZNF622	-0.534165	5.32627e-07	-0.536953	8.48836e-07	-0.00278784	0.983573	669.109	453.829	436.269
ENSG00000109475	RPL34	-0.804845	5.37075e-07	-1.03196	1.37725e-10	-0.227118	0.0991253	12989.9	8416.53	6935.37
ENSG00000164442	CITED2	-1.02527	5.41517e-07	-0.904692	1.94396e-05	0.120576	0.570183	1442.47	585.497	599.365
ENSG00000084444	KIAA1467	0.999423	5.4868e-07	0.849517	4.28236e-05	-0.149906	0.436955	121.054	303.846	232.747
ENSG00000112282	MED23	0.534096	5.56006e-07	0.59206	4.34528e-08	0.0579641	0.587711	434.403	631.304	679.719
ENSG00000169567	HINT1	-0.656783	5.62525e-07	-0.747954	1.79647e-08	-0.0911708	0.477087	2563.95	1785.87	1663.37
ENSG00000169429	CXCL8	-2.06566	5.67133e-07	-0.711621	0.143811	1.35404	0.00053561	71.9276	7.65517	21.6284
ENSG00000083444	PLOD1	0.897577	5.74233e-07	0.746516	6.64773e-05	-0.151061	0.37885	3456.13	6721.35	5731.68
ENSG00000052850	ALX4	1.62863	5.85467e-07	1.13664	0.00100228	-0.491992	0.10725	76.456	244.859	187.673
ENSG00000163539	CLASP2	0.717779	5.90777e-07	0.503891	0.000973403	-0.213888	0.0761681	721.425	1189.72	1022.56
ENSG00000114646	CSPG5	1.66345	5.97807e-07	1.46992	1.89103e-05	-0.193529	0.54951	3.46392	15.4643	11.9612
ENSG00000144118	RALB	-0.537524	6.03269e-07	-0.151495	0.259715	0.386029	9.61835e-07	1136.31	791.462	1029.05
ENSG00000155906	RMND1	-0.650094	6.20827e-07	-0.645735	1.32209e-06	0.00435904	0.979537	280.952	187.681	192.5
ENSG00000137274	BPHL	0.618655	6.30517e-07	0.397716	0.00290432	-0.22094	0.0252891	238.137	391.732	329.897
ENSG00000197771	MCMBP	-0.35343	6.39773e-07	-0.261057	0.000495388	0.0923732	0.12614	1140.8	945.189	993.007
ENSG00000187942	LDLRAD2	1.22215	6.43355e-07	1.07663	2.25533e-05	-0.145522	0.562174	41.402	104.37	81.48
ENSG00000105880	DLX5	0.884492	6.4643e-07	0.409904	0.0417159	-0.474587	0.000545211	840.742	1492.06	1030.39
ENSG00000110218	PANX1	-0.855999	6.4643e-07	-0.317282	0.11778	0.538716	3.5728e-05	286.974	165.255	233.655
ENSG00000156831	NSMCE2	-0.514396	6.47429e-07	-0.419325	0.000102303	0.0950713	0.315816	344.062	257.446	268.687
ENSG00000153904	DDAH1	0.744586	6.69582e-07	0.453684	0.00517399	-0.290902	0.0156479	773.894	1408	1196.38
ENSG00000110328	GALNT18	0.84989	6.88778e-07	0.622633	0.000580693	-0.227257	0.12614	2156.03	4107.97	3316.05
ENSG00000012822	CALCOCO1	-0.546508	6.89256e-07	-0.764646	3.10599e-12	-0.218138	0.012906	4101.34	2438.09	2161.59
ENSG00000181773	GPR3	-1.62254	6.91515e-07	-1.72813	2.19142e-07	-0.10559	0.807259	22.5619	5.30864	5.08757
ENSG00000164877	MICALL2	0.869739	6.92864e-07	0.704615	0.000120679	-0.165124	0.304249	167.83	269.91	232.698
ENSG00000138326	RPS24	-0.647483	6.94026e-07	-0.641427	1.58672e-06	0.00605623	0.971336	24560.9	18137.5	18381.8
ENSG00000166923	GREM1	1.94935	7.00579e-07	1.41276	0.000619047	-0.536587	0.194287	548.071	4691.65	2640.26
ENSG00000122140	MRPS2	-0.493291	7.0188e-07	-0.660236	3.06125e-11	-0.166944	0.0412437	494.044	306.607	278.298
ENSG00000161958	FGF11	1.20051	7.11643e-07	0.89976	0.000421751	-0.300754	0.169212	164.725	404.488	346.817
ENSG00000157557	ETS2	-1.0464	7.23784e-07	-1.1461	8.78352e-08	-0.0997042	0.661636	4762.62	1942.92	1874.3
ENSG00000123243	ITIH5	1.28241	7.2844e-07	1.28915	1.08822e-06	0.00673484	0.984595	1773.11	4816.04	4553.46
ENSG00000196821	C6orf106	-0.462078	7.2844e-07	-0.361459	0.000223853	0.100619	0.224702	1738.13	1307.94	1372.61
ENSG00000171051	FPR1	-2.06219	7.52091e-07	-0.290315	0.623387	1.77187	3.59142e-06	114.549	9.85563	43.746
ENSG00000204264	PSMB8	-1.0445	7.57162e-07	-0.711196	0.00157055	0.333302	0.0710474	56.1556	26.493	33.7343
ENSG00000206298	PSMB8	-1.0445	7.57162e-07	-0.711196	0.00157055	0.333302	0.0710474	56.1556	26.493	33.7343
ENSG00000226201	PSMB8	-1.0445	7.57162e-07	-0.711196	0.00157055	0.333302	0.0710474	56.1556	26.493	33.7343
ENSG00000230669	PSMB8	-1.0445	7.57162e-07	-0.711196	0.00157055	0.333302	0.0710474	56.1556	26.493	33.7343
ENSG00000236443	PSMB8	-1.0445	7.57162e-07	-0.711196	0.00157055	0.333302	0.0710474	56.1556	26.493	33.7343
ENSG00000223658	AC011242.6	0.721696	7.59078e-07	0.541836	0.00042876	-0.17986	0.137718	87.3114	169.151	152.066
ENSG00000087074	PPP1R15A	-1.12729	7.66777e-07	-0.835921	0.000510874	0.291368	0.155954	1566.31	674.474	800.966
ENSG00000124374	PAIP2B	-1.07916	7.66777e-07	-1.43527	4.77472e-11	-0.356109	0.0585788	304.459	140.115	105.308
ENSG00000102119	EMD	-0.549974	7.70521e-07	-0.774187	2.88371e-12	-0.224213	0.0113117	1222.51	824.452	720.355
ENSG00000168395	ING5	-0.54187	7.70521e-07	-0.556167	6.70601e-07	-0.0142972	0.917591	383.291	248.5	252.249
ENSG00000064205	WISP2	-1.70459	7.79428e-07	-0.447321	0.304109	1.25727	1.31951e-05	2570.15	501.704	1435.63
ENSG00000125266	EFNB2	-1.91077	7.79428e-07	-0.321299	0.546155	1.58947	2.49027e-06	108.812	16.8548	74.1723
ENSG00000050767	COL23A1	1.67824	7.91494e-07	1.40354	6.71118e-05	-0.274701	0.416288	5.66047	21.5114	24.6764
ENSG00000171608	PIK3CD	-0.915279	7.91938e-07	-0.712055	0.000249295	0.203225	0.232972	205.846	94.1205	101.655
ENSG00000146281	PM20D2	-0.791384	8.10785e-07	-0.823838	4.71207e-07	-0.0324542	0.866545	593.781	396.463	413.873
ENSG00000164114	MAP9	1.06404	8.41388e-07	1.10073	5.61703e-07	0.0366841	0.889896	95.8391	250.049	265.387
ENSG00000100285	NEFH	1.26899	8.50114e-07	1.35713	2.11945e-07	0.088131	0.759173	30.4423	79.9988	91.5026
ENSG00000137409	MTCH1	-0.375579	8.53596e-07	-0.440289	1.09344e-08	-0.0647096	0.361717	1821.62	1365.75	1362.87
ENSG00000100626	GALNT16	1.58193	8.61236e-07	1.53352	3.09708e-06	-0.0484052	0.912696	382.45	1314.65	1440.1
ENSG00000211584	SLC48A1	-0.666075	8.87581e-07	-0.628991	6.44477e-06	0.0370838	0.808773	331.94	204.339	203.356
ENSG00000137309	HMGA1	-1.50099	8.9859e-07	-0.787073	0.0196027	0.713915	0.00656918	258.455	57.9713	86.5124
ENSG00000165548	TMEM63C	2.02053	8.9859e-07	2.06562	6.35685e-07	0.0450862	0.940763	0.941807	18.1441	19.3453
ENSG00000163257	DCAF16	-0.674756	9.01887e-07	-0.764268	3.87443e-08	-0.0895123	0.510806	680.357	404.289	376.405
ENSG00000144908	ALDH1L1	-1.35239	9.12214e-07	-1.86725	9.43917e-12	-0.514857	0.031599	903.628	268.871	182.429
ENSG00000206190	ATP10A	0.750789	9.31999e-07	0.986759	1.06433e-10	0.23597	0.0639432	528.706	847.249	1062.98
ENSG00000153993	SEMA3D	1.39194	9.34113e-07	1.26403	1.54612e-05	-0.127913	0.691617	997.09	3207.63	2631.59
ENSG00000123338	NCKAP1L	-1.56475	9.44386e-07	-0.0442793	0.93711	1.52047	2.30079e-09	280.695	67.7609	218.965
ENSG00000105287	PRKD2	-0.667795	9.48051e-07	-0.512778	0.000344823	0.155017	0.201925	468.48	242.265	274.477
ENSG00000138028	CGREF1	0.903748	9.67604e-07	0.808802	2.23484e-05	-0.0949466	0.622688	520.548	888.689	791.065
ENSG00000167105	TMEM92	-2.03012	9.80053e-07	-2.74144	2.59615e-11	-0.711319	0.110279	93.4048	9.38873	3.85724
ENSG00000149182	ARFGAP2	-0.45819	9.81106e-07	-0.558162	3.13541e-09	-0.0999724	0.232132	1057.07	694.198	639.183
ENSG00000261371	PECAM1	-2.01972	9.83155e-07	0.181456	0.775082	2.20118	2.27476e-09	1938.35	156.341	1294.58
ENSG00000180616	SSTR2	1.30306	9.9201e-07	0.838707	0.00337426	-0.464352	0.0443924	521.266	1381.19	885.521
ENSG00000075415	SLC25A3	-0.408923	1.02098e-06	-0.402725	2.64017e-06	0.00619785	0.953623	4680.2	3836.05	3657.66
ENSG00000131979	GCH1	-1.08236	1.02886e-06	-1.36051	8.79343e-10	-0.278144	0.163666	711.536	383.945	323.775
ENSG00000198586	TLK1	-0.433187	1.03033e-06	-0.392735	1.77517e-05	0.0404517	0.661412	951.395	712.112	745.593
ENSG00000175029	CTBP2	-0.438513	1.03785e-06	-0.336509	0.000367875	0.102004	0.195411	1023.92	730.326	771.524
ENSG00000106976	DNM1	0.841589	1.0457e-06	1.00834	6.14132e-09	0.166753	0.293806	876.91	1304.59	1454.19
ENSG00000162434	JAK1	-0.429843	1.09229e-06	-0.268675	0.00479248	0.161167	0.0228803	3465.78	2628	2920.49
ENSG00000172456	FGGY	-0.892091	1.09984e-06	-1.23824	1.1397e-11	-0.346153	0.0218877	390.507	223.872	164.633
ENSG00000165801	ARHGEF40	0.731839	1.10385e-06	0.594861	0.00015203	-0.136977	0.32508	1472.46	2140.51	2059.6
ENSG00000136048	DRAM1	-0.700915	1.12326e-06	-0.42442	0.00651821	0.276494	0.0172788	484.63	336.586	386.79
ENSG00000112033	PPARD	-0.435605	1.13022e-06	-0.455308	6.04888e-07	-0.0197038	0.850172	650.82	414.989	402.011
ENSG00000136457	CHAD	1.26575	1.13022e-06	0.706306	0.0132054	-0.559444	0.00996414	46990	116007	72180.6
ENSG00000184489	PTP4A3	-1.20618	1.13022e-06	-0.902794	0.000530088	0.303386	0.187546	128.958	43.5111	61.267
ENSG00000020577	SAMD4A	0.829961	1.1308e-06	0.690137	0.000103968	-0.139824	0.389816	1928.23	3756.53	3447.21
ENSG00000171631	P2RY6	1.28082	1.13861e-06	1.319	8.62762e-07	0.0381781	0.911014	110.473	268.84	288.057
ENSG00000121966	CXCR4	-2.04342	1.16156e-06	0.0185386	0.980881	2.06196	6.47479e-08	154.796	12.7753	81.2603
ENSG00000139675	HNRNPA1L2	0.556611	1.16281e-06	0.320067	0.010644	-0.236544	0.00685488	134.087	178.714	145.592
ENSG00000275246	TLCD2	-0.865085	1.18234e-06	-0.867879	1.87708e-06	-0.00279429	0.990052	467.101	246.375	251.75
ENSG00000164576	SAP30L	-0.654528	1.18503e-06	-0.526833	0.000187518	0.127695	0.301225	1245.86	875.823	945.289
ENSG00000145949	MYLK4	0.996933	1.19549e-06	0.974456	3.55713e-06	-0.0224769	0.928633	33.2887	74.4054	67.5449
ENSG00000111817	DSE	-0.841867	1.2e-06	-0.990598	1.45343e-08	-0.14873	0.365846	3524.37	1805.35	1730.15
ENSG00000134061	CD180	-1.8682	1.20521e-06	0.0646493	0.921501	1.93285	4.41257e-09	48.6374	6.86149	32.3842
ENSG00000127903	ZNF835	1.56345	1.21483e-06	1.26983	0.000155295	-0.293614	0.336537	7.33219	29.6301	25.9385
ENSG00000111669	TPI1	0.640562	1.22752e-06	0.51604	0.000189963	-0.124522	0.303055	6438.52	10055.1	9222.89
ENSG00000006611	USH1C	1.76457	1.24387e-06	1.74827	2.32743e-06	-0.016299	0.975073	14.6351	109.679	107.073
ENSG00000166889	PATL1	-0.602378	1.24387e-06	-0.493114	0.000144621	0.109264	0.343596	987.044	609.172	667.155
ENSG00000167695	FAM57A	0.674933	1.24511e-06	0.528948	0.000296241	-0.145985	0.236859	321.188	601.162	474.7
ENSG00000153094	BCL2L11	-1.14097	1.25508e-06	-0.488471	0.0701611	0.652497	0.000496698	145.244	58.4419	98.5395
ENSG00000026652	AGPAT4	0.606359	1.26291e-06	0.457032	0.000533153	-0.149327	0.170015	1085.39	1618.8	1414.59
ENSG00000026508	CD44	-0.865669	1.26448e-06	-0.719991	0.000111581	0.145678	0.395175	11210.3	5523.4	6259.33
ENSG00000137960	GIPC2	-1.28609	1.26644e-06	-0.7915	0.00538091	0.494591	0.0368013	38.4602	15.9782	26.3605
ENSG00000090013	BLVRB	-0.688814	1.27095e-06	-0.55464	0.000195362	0.134174	0.306066	727.408	412.916	432.731
ENSG00000166123	GPT2	0.85777	1.27735e-06	0.596807	0.00154786	-0.260963	0.0822438	450.876	809.458	640.783
ENSG00000124370	MCEE	0.518099	1.29894e-06	0.276897	0.0194119	-0.241202	0.00310095	349.889	526.901	432.724
ENSG00000101825	MXRA5	1.51248	1.30338e-06	2.06507	2.9686e-11	0.552595	0.0496939	2566.57	8009.51	12141.8
ENSG00000111912	NCOA7	-0.82234	1.3059e-06	-0.704203	6.64773e-05	0.118137	0.480239	648.995	374.232	429.273
ENSG00000101421	CHMP4B	-0.524218	1.30615e-06	-0.560878	3.59827e-07	-0.0366605	0.758257	3256.4	2271.98	2198.83
ENSG00000108840	HDAC5	-0.543284	1.31051e-06	-0.552745	1.46382e-06	-0.00946167	0.947653	1268.97	834.739	820.609
ENSG00000130812	ANGPTL6	0.782688	1.31879e-06	0.417461	0.0197927	-0.365227	0.00362746	232.602	385.659	313.679
ENSG00000185201	IFITM2	-1.08178	1.32191e-06	-0.961259	3.27126e-05	0.120524	0.610651	6206.68	1932.35	2264.11
ENSG00000120729	MYOT	1.46041	1.32235e-06	0.805535	0.0151413	-0.654879	0.0101829	41.0146	137.778	91.1796
ENSG00000163590	PPM1L	-1.07243	1.33669e-06	-0.334209	0.218575	0.738224	1.46238e-05	332.196	135.877	233.237
ENSG00000165502	RPL36AL	-0.80067	1.33669e-06	-1.12892	7.07287e-12	-0.328248	0.0139624	5319.25	2835.97	2481.33
ENSG00000123131	PRDX4	0.722008	1.33934e-06	0.561541	0.000348452	-0.160468	0.230838	2119.94	4042.45	3269.96
ENSG00000127666	TICAM1	-0.671802	1.3434e-06	-0.614039	1.8469e-05	0.0577629	0.699207	390.896	195.325	209.082
ENSG00000225492	GBP1P1	-1.35354	1.3434e-06	-1.34751	2.57159e-06	0.00602833	0.987658	38.5814	13.5151	14.3684
ENSG00000138964	PARVG	-1.91303	1.3473e-06	0.215665	0.711977	2.1287	6.46935e-10	63.7362	7.39214	38.228
ENSG00000196981	WDR5B	0.795439	1.39394e-06	0.709394	3.19528e-05	-0.0860443	0.607334	165.266	303.734	262.968
ENSG00000182993	C12orf60	0.82392	1.39442e-06	0.687041	0.000111913	-0.136879	0.365154	43.4506	81.4415	74.7268
ENSG00000173166	RAPH1	0.715226	1.39684e-06	0.656943	1.74798e-05	-0.0582828	0.716895	1337.82	2266.29	2276.96
ENSG00000164615	CAMLG	-0.735504	1.39735e-06	-0.859693	2.29835e-08	-0.124189	0.391899	1528.5	1091.4	1023.81
ENSG00000108733	PEX12	0.550197	1.41856e-06	0.319412	0.010423	-0.230784	0.00866096	215.424	322.265	281.123
ENSG00000138379	MSTN	1.69965	1.42082e-06	1.31322	0.000376213	-0.386424	0.203688	1.99635	10.866	10.3694
ENSG00000135272	MDFIC	-0.525659	1.42905e-06	-0.395047	0.000589542	0.130612	0.168275	1599.71	1112.64	1240.95
ENSG00000253304	TMEM200B	-0.693485	1.42905e-06	-0.764176	1.6553e-07	-0.0706912	0.639828	476.469	277.526	288.499
ENSG00000000003	TSPAN6	0.854065	1.45046e-06	0.449904	0.022197	-0.404161	0.00387866	1957.36	4191.43	3070.22
ENSG00000130338	TULP4	0.908335	1.45734e-06	0.923298	1.62514e-06	0.0149632	0.951188	168.913	340.007	337.217
ENSG00000112799	LY86	-1.9727	1.46531e-06	0.201913	0.742074	2.17461	2.20651e-09	50.4899	5.5909	35.7692
ENSG00000147202	DIAPH2	-0.625466	1.47992e-06	-0.385568	0.00601555	0.239899	0.0224399	460.262	300.002	364.847
ENSG00000132792	CTNNBL1	-0.537029	1.49282e-06	-0.478157	3.51006e-05	0.0588719	0.604624	668.967	487.472	502.13
ENSG00000157216	SSBP3	-0.676693	1.51513e-06	-0.969949	4.09444e-12	-0.293256	0.00875675	1538.48	942.786	750.376
ENSG00000001630	CYP51A1	0.642647	1.52025e-06	0.506659	0.000305574	-0.135988	0.256928	630.334	1060.69	913.503
ENSG00000133606	MKRN1	-0.459462	1.54839e-06	-0.453421	3.67365e-06	0.00604032	0.9609	1670.11	1127.1	1177.05
ENSG00000139292	LGR5	-2.07347	1.55962e-06	-1.18363	0.0108466	0.889837	0.052855	106.351	5.49468	11.8765
ENSG00000110583	NAA40	0.598258	1.5615e-06	0.517015	6.63445e-05	-0.081243	0.498309	241.459	336.192	297.856
ENSG00000156515	HK1	0.527298	1.56669e-06	0.388035	0.000839522	-0.139263	0.139086	2695.11	3802.17	3374.38
ENSG00000102931	ARL2BP	0.431568	1.56808e-06	0.319322	0.000779481	-0.112246	0.142288	1153.45	1759.51	1613.7
ENSG00000183172	SMDT1	-0.796312	1.56808e-06	-0.971639	7.18875e-09	-0.175326	0.254754	159.166	94.7199	75.3859
ENSG00000272835	SMDT1	-0.796312	1.56808e-06	-0.971639	7.18875e-09	-0.175326	0.254754	159.166	94.7199	75.3859
ENSG00000274112	SMDT1	-0.796312	1.56808e-06	-0.971639	7.18875e-09	-0.175326	0.254754	159.166	94.7199	75.3859
ENSG00000254093	PINX1	-0.661683	1.57427e-06	-0.635552	7.13263e-06	0.026131	0.874722	157.983	112.269	110.551
ENSG00000213923	CSNK1E	-0.609045	1.65913e-06	-0.452489	0.000755424	0.156556	0.156116	1495.21	856.233	976.417
ENSG00000092203	TOX4	-0.477603	1.68065e-06	-0.49528	1.13505e-06	-0.0176778	0.882964	1586.72	1051.21	1063.21
ENSG00000108639	SYNGR2	-0.849945	1.68647e-06	-0.635289	0.000694031	0.214656	0.17297	684.222	326.333	395.137
ENSG00000081041	CXCL2	-2.02625	1.71992e-06	-0.38472	0.493082	1.64153	3.71118e-05	22.0833	2.46786	11.3589
ENSG00000187601	MAGEH1	0.544386	1.7217e-06	0.368903	0.00242718	-0.175483	0.0609281	1015.36	1537.82	1385.05
ENSG00000156802	ATAD2	-0.83253	1.74076e-06	-0.503392	0.0076319	0.329138	0.0206936	224.935	141.662	177.896
ENSG00000211456	SACM1L	0.553697	1.74076e-06	0.5956	4.18689e-07	0.0419022	0.737903	600.297	898.856	906.737
ENSG00000196396	PTPN1	-0.531785	1.74208e-06	-0.479777	3.03056e-05	0.0520074	0.654461	930.85	639.972	657.231
ENSG00000119771	KLHL29	0.802038	1.77029e-06	0.411636	0.0278572	-0.390402	0.00299568	1255.22	1914.61	1681.39
ENSG00000155287	SLC25A28	-0.854956	1.77029e-06	-1.04481	6.29763e-09	-0.189856	0.2443	1496.92	634.405	570.776
ENSG00000183690	EFHC2	0.960063	1.77029e-06	1.0461	2.50483e-07	0.0860332	0.67771	47.859	107.898	111.225
ENSG00000274779	NOMO1	0.883134	1.77029e-06	0.792504	3.39847e-05	-0.0906294	0.643443	2043.23	3901.47	3243.64
ENSG00000042286	AIFM2	-0.595381	1.81775e-06	-0.552262	1.69836e-05	0.0431182	0.756245	182.039	107.526	113.805
ENSG00000078596	ITM2A	1.26831	1.81999e-06	0.838295	0.00324763	-0.430015	0.0651161	3019.62	8676.7	5798.92
ENSG00000127328	RAB3IP	-1.07156	1.84484e-06	-1.0029	1.41803e-05	0.068662	0.791449	138.406	65.1343	74.0442
ENSG00000169692	AGPAT2	-0.541145	1.8729e-06	-0.382562	0.00151233	0.158583	0.0989222	446.371	275.875	305.316
ENSG00000073417	PDE8A	0.509584	1.87647e-06	0.51591	2.28925e-06	0.00632559	0.962857	511.65	686.105	700.21
ENSG00000173698	GPR64	1.01023	1.88482e-06	1.16564	5.10328e-08	0.155414	0.457874	1497.24	2908.75	3489.75
ENSG00000136925	TSTD2	0.435757	1.88524e-06	0.31053	0.00140584	-0.125227	0.0982112	362.464	484.745	427.151
ENSG00000157111	TMEM171	-1.47159	1.88524e-06	-1.54353	9.62101e-07	-0.071946	0.865457	21.8446	6.28182	6.19428
ENSG00000017797	RALBP1	-0.329297	1.88758e-06	-0.355711	4.13909e-07	-0.0264139	0.72176	1615.28	1331.36	1344.51
ENSG00000113328	CCNG1	-0.771355	1.89389e-06	-0.98596	1.19199e-09	-0.214605	0.125355	1678.48	1134.48	963.455
ENSG00000125818	PSMF1	-0.449641	1.89413e-06	-0.455746	2.28786e-06	-0.00610515	0.960027	2053.28	1265.22	1314.25
ENSG00000169744	LDB2	-1.84802	1.92305e-06	-0.201926	0.727559	1.64609	9.77165e-07	132.219	19.3516	84.9874
ENSG00000159840	ZYX	-0.755626	1.94648e-06	-0.341944	0.0591978	0.413682	0.000708533	1348.44	656.547	861.346
ENSG00000121904	CSMD2	1.18066	1.9477e-06	1.31405	1.68405e-07	0.133391	0.613983	219.78	512.876	536.58
ENSG00000197142	ACSL5	-0.936028	1.98396e-06	-0.514465	0.0175603	0.421563	0.0080061	217.622	113.738	160.676
ENSG00000112773	FAM46A	0.63629	1.99497e-06	0.342446	0.0207804	-0.293844	0.0050168	3288.22	5470.61	4542.72
ENSG00000134901	KDELC1	0.79287	1.99497e-06	0.912475	6.01268e-08	0.119605	0.453596	222.961	444.781	441.49
ENSG00000101460	MAP1LC3A	-0.591806	2.02221e-06	-0.556116	1.4625e-05	0.0356898	0.797649	211.932	135.335	134.3
ENSG00000164684	ZNF704	0.82328	2.02221e-06	0.741772	3.48331e-05	-0.0815085	0.655806	949.175	1760.53	1731.05
ENSG00000174080	CTSF	0.878958	2.06559e-06	0.508846	0.0120053	-0.370112	0.0133913	2837.61	5420.78	4088.13
ENSG00000172197	MBOAT1	0.864216	2.06999e-06	0.625059	0.00120373	-0.239156	0.128339	272.693	464.075	384.759
ENSG00000186187	ZNRF1	-0.671706	2.06999e-06	-0.323193	0.0423287	0.348513	0.00137355	230.741	145.797	187.925
ENSG00000130066	SAT1	-0.896601	2.07883e-06	-0.848507	1.26915e-05	0.0480949	0.825885	5837.41	3084.58	3241.13
ENSG00000160446	ZDHHC12	-0.730233	2.07883e-06	-0.630343	8.31124e-05	0.0998901	0.518135	125.603	70.1751	71.0177
ENSG00000163877	SNIP1	0.525674	2.08036e-06	0.403473	0.000544128	-0.122201	0.20065	261.609	376.36	338.175
ENSG00000124795	DEK	-0.524708	2.124e-06	-0.270886	0.0280098	0.253823	0.0030227	1919.21	1374.13	1742.4
ENSG00000115840	SLC25A12	0.468814	2.15405e-06	0.498151	7.57959e-07	0.0293373	0.783352	287.066	404.963	398.167
ENSG00000197702	PARVA	-0.494539	2.16344e-06	-0.376956	0.000610449	0.117583	0.199612	2367.14	1788.89	1984.11
ENSG00000010270	STARD3NL	-0.528992	2.18339e-06	-0.331978	0.00589724	0.197014	0.0284306	334.769	260.642	297.083
ENSG00000149357	LAMTOR1	-0.434594	2.19232e-06	-0.58185	2.17853e-10	-0.147256	0.0505061	1243.77	919.333	826.631
ENSG00000174206	C12orf66	-0.747414	2.20769e-06	-0.872017	4.67171e-08	-0.124603	0.412723	164.396	108.743	100.529
ENSG00000166173	LARP6	-0.63437	2.23686e-06	-0.764436	1.4898e-08	-0.130065	0.288066	1132.65	670.631	596.234
ENSG00000266094	RASSF5	-0.842715	2.24116e-06	-0.787374	1.7857e-05	0.0553415	0.783313	252.405	125.573	130.065
ENSG00000110492	MDK	-1.17352	2.24398e-06	-0.902852	0.000534587	0.270663	0.244917	791.251	267.284	331.056
ENSG00000174348	PODN	-1.81509	2.24962e-06	-0.280931	0.604031	1.53416	3.76676e-06	264.176	40.6409	152.508
ENSG00000006459	KDM7A	-1.00333	2.25188e-06	-0.838438	0.000150514	0.164895	0.428195	1124.11	505.555	578.779
ENSG00000163734	CXCL3	-1.93424	2.29074e-06	-0.594551	0.225809	1.33969	0.000512722	15.7883	1.87383	6.31462
ENSG00000158623	COPG2	-0.538198	2.31625e-06	-0.551428	2.1819e-06	-0.0132304	0.926517	493.215	352.373	339.486
ENSG00000125458	NT5C	-0.533848	2.33131e-06	-0.712022	2.89804e-10	-0.178174	0.0578624	414.433	253.754	222.746
ENSG00000168653	NDUFS5	-0.498331	2.35008e-06	-0.420057	0.000135951	0.078274	0.437346	1615.88	1183.37	1196.46
ENSG00000005022	SLC25A5	-0.590385	2.38193e-06	-0.36963	0.00629949	0.220755	0.0296505	1089.37	762.884	854.056
ENSG00000111676	ATN1	-0.495497	2.38751e-06	-0.6532	4.72363e-10	-0.157703	0.0706354	4130.35	2249.49	2130.7
ENSG00000105341	ATP5SL	-0.475047	2.39722e-06	-0.348958	0.00105225	0.126089	0.144382	447.466	319.627	342.778
ENSG00000166927	MS4A7	-1.89454	2.39722e-06	0.315485	0.57323	2.21002	2.86977e-10	323.65	37.2647	252.266
ENSG00000172819	RARG	0.705384	2.42413e-06	0.391845	0.0174615	-0.31354	0.00813783	2287.4	3567.94	2832.15
ENSG00000104969	SGTA	-0.547014	2.42955e-06	-0.726931	3.50466e-10	-0.179916	0.0614292	1407.57	840.909	745.231
ENSG00000261857	MIA	1.12747	2.42955e-06	0.63021	0.0165243	-0.497261	0.0118303	5535.39	13412.9	8126.01
ENSG00000181291	TMEM132E	1.80921	2.47065e-06	1.80887	3.52701e-06	-0.000338086	0.999385	7.00258	44.9021	58.3013
ENSG00000147687	TATDN1	-0.661657	2.47191e-06	-0.707002	7.49986e-07	-0.0453446	0.770879	513.671	355.289	350.78
ENSG00000276463	TAF9	-0.517121	2.47626e-06	-0.543088	1.21051e-06	-0.0259678	0.836224	350.191	260.447	254.27
ENSG00000197712	FAM114A1	0.521564	2.50786e-06	0.572915	3.50797e-07	0.0513515	0.655724	2234.91	3172.43	3251.72
ENSG00000101940	WDR13	-0.546459	2.54246e-06	-0.64588	3.5131e-08	-0.0994214	0.358383	1240.99	757.257	706.838
ENSG00000198039	ZNF273	0.844353	2.55063e-06	0.465651	0.0186599	-0.378702	0.00715283	119.756	199.903	174.502
ENSG00000121680	PEX16	-0.68822	2.59559e-06	-0.708705	2.16991e-06	-0.0204849	0.911156	307.14	173.404	173.748
ENSG00000184009	ACTG1	-0.708858	2.63037e-06	-0.455112	0.00514925	0.253746	0.0407662	24269	12080.7	14881.7
ENSG00000120458	MSANTD2	0.465985	2.63602e-06	0.274916	0.0110821	-0.191069	0.0123117	209.303	268.612	242.553
ENSG00000181458	TMEM45A	0.628366	2.71942e-06	0.547364	8.31124e-05	-0.0810015	0.543262	1536.49	2572.44	2434.43
ENSG00000122679	RAMP3	1.36148	2.72637e-06	1.50149	3.20636e-07	0.140019	0.667049	219.017	655.382	768.622
ENSG00000111144	LTA4H	-0.529448	2.76592e-06	-0.669946	3.2727e-09	-0.140498	0.149028	2100.24	1512.91	1423.23
ENSG00000166289	PLEKHF1	-0.788068	2.8434e-06	-0.573394	0.00128977	0.214674	0.144748	346.269	166.392	189.824
ENSG00000137573	SULF1	1.33925	2.87021e-06	1.56148	5.98698e-08	0.222226	0.448684	1791.63	6182.02	7274.63
ENSG00000120457	KCNJ5	-1.7566	2.90548e-06	0.191203	0.731721	1.9478	7.44119e-10	59.2277	7.18156	35.4339
ENSG00000197063	MAFG	-0.372192	2.91188e-06	-0.186242	0.0368825	0.185951	0.00223619	411.592	307.397	337.387
ENSG00000166922	SCG5	1.27124	2.92115e-06	1.35645	8.87844e-07	0.0852104	0.777656	23.0502	64.6582	63.8567
ENSG00000141101	NOB1	-0.45037	2.94343e-06	-0.473334	1.41954e-06	-0.0229638	0.833936	907.011	665.835	659.396
ENSG00000184162	NR2C2AP	-0.557144	2.95947e-06	-0.596785	9.17412e-07	-0.0396409	0.764116	207.024	142.28	136.77
ENSG00000153208	MERTK	-0.995796	2.96476e-06	-0.361304	0.154109	0.634492	0.000113649	263.957	116.375	173.493
ENSG00000126107	HECTD3	0.523616	2.97291e-06	0.411415	0.000468838	-0.112201	0.259382	499.164	615.721	580.055
ENSG00000023902	PLEKHO1	-0.987871	3.0063e-06	-0.0864811	0.792595	0.901389	9.8128e-09	336.035	126.868	224.121
ENSG00000118402	ELOVL4	0.81815	3.05107e-06	0.854964	1.61753e-06	0.0368138	0.856372	123.238	283.731	275.533
ENSG00000140941	MAP1LC3B	-0.521273	3.05107e-06	-0.362065	0.00236017	0.159208	0.089166	1544.29	1168.53	1310.91
ENSG00000168065	SLC22A11	1.58474	3.05107e-06	1.34112	0.000140848	-0.243626	0.487541	9.48663	41.4788	26.0253
ENSG00000173852	DPY19L1	0.4047	3.05107e-06	0.385394	1.53779e-05	-0.0193057	0.844517	737.311	1140.65	1150.22
ENSG00000213903	LTB4R	-0.967149	3.05616e-06	-1.27586	7.40727e-10	-0.308715	0.0907745	150.943	62.6731	49.3232
ENSG00000213088	ACKR1	-2.06575	3.07484e-06	-0.322883	0.598062	1.74287	0.000266814	156.657	6.54212	82.8472
ENSG00000111445	RFC5	-0.602326	3.10863e-06	-0.454515	0.000834619	0.147812	0.191551	195.85	138.268	157.803
ENSG00000100575	TIMM9	-0.659167	3.25284e-06	-0.714278	6.90347e-07	-0.0551111	0.720047	502.709	381.299	354.735
ENSG00000184156	KCNQ3	-1.70008	3.27077e-06	-0.840818	0.0388328	0.859266	0.0100554	73.2202	15.2907	31.1126
ENSG00000167397	VKORC1	0.666412	3.27939e-06	0.514148	0.000647914	-0.152265	0.234377	3062.8	4778.68	4081.06
ENSG00000129675	ARHGEF6	0.56532	3.3061e-06	0.53742	1.70246e-05	-0.0278999	0.840289	659.605	1034.25	1021.68
ENSG00000165175	MID1IP1	-0.499641	3.32186e-06	-0.492748	7.61984e-06	0.00689231	0.960443	710.324	488.108	486.403
ENSG00000198924	DCLRE1A	0.519155	3.32186e-06	0.430677	0.000218611	-0.0884776	0.376469	143.513	224.75	203.448
ENSG00000162889	MAPKAPK2	-0.504954	3.33868e-06	-0.473288	2.35873e-05	0.0316654	0.791533	1794.84	1225.4	1199.87
ENSG00000167654	ATCAY	1.52356	3.36374e-06	1.1474	0.000875089	-0.37616	0.173883	4.05382	17.279	14.6208
ENSG00000172824	CES4A	1.11655	3.37282e-06	0.561025	0.0378414	-0.555529	0.00270908	24.624	49.7552	34.019
ENSG00000182492	BGN	0.746495	3.37282e-06	0.535021	0.00171087	-0.211474	0.126445	86328.8	141506	118987
ENSG00000172901	AQPEP	1.20436	3.38005e-06	0.715092	0.0113425	-0.489271	0.0260003	622.258	1502.46	994.94
ENSG00000205302	SNX2	-0.642195	3.38005e-06	-0.145616	0.424609	0.496579	8.94063e-07	1156.2	769.346	1102.72
ENSG00000157916	RER1	-0.292587	3.38771e-06	-0.330297	2.26196e-07	-0.0377097	0.543262	2278.96	2054.71	1945.93
ENSG00000178342	KCNG2	1.58704	3.43158e-06	1.35234	0.000131481	-0.234706	0.497317	5.66434	20.8048	18.8199
ENSG00000155629	PIK3AP1	-1.59343	3.43364e-06	0.165713	0.749569	1.75914	2.76598e-10	156.998	26.6183	106.502
ENSG00000156697	UTP14A	-0.501676	3.44925e-06	-0.367403	0.001312	0.134273	0.147472	424.122	313.417	346.888
ENSG00000123240	OPTN	-0.453312	3.46652e-06	-0.278418	0.00859877	0.174894	0.0258871	1967.48	1358.32	1517.93
ENSG00000168394	TAP1	-0.941912	3.46652e-06	-0.630222	0.00374229	0.31169	0.0752086	87.1907	42.6673	54.7157
ENSG00000232367	TAP1	-0.941912	3.46652e-06	-0.630222	0.00374229	0.31169	0.0752086	87.1907	42.6673	54.7157
ENSG00000100897	DCAF11	-0.390768	3.47404e-06	-0.389646	6.16981e-06	0.00112196	0.991102	1215.33	811.365	824.031
ENSG00000102362	SYTL4	-1.06886	3.47404e-06	-0.996016	2.70496e-05	0.072847	0.783732	334.585	144.469	139.114
ENSG00000135999	EPC2	-0.434127	3.47404e-06	-0.415453	1.52421e-05	0.0186732	0.865502	771.256	600.073	635.069
ENSG00000072274	TFRC	0.995829	3.50114e-06	0.808481	0.000318299	-0.187348	0.361912	1496.26	3716.87	3099.51
ENSG00000138646	HERC5	-0.978891	3.50114e-06	-1.15117	6.32206e-08	-0.172274	0.403084	249.211	128.292	123.751
ENSG00000141965	FEM1A	0.486241	3.54735e-06	0.47751	9.03668e-06	-0.00873153	0.947304	299.881	413.557	390.923
ENSG00000214357	NEURL1B	-1.8913	3.5679e-06	0.382679	0.478771	2.27397	2.40681e-10	142.659	15.7743	137.861
ENSG00000116459	ATP5F1	-0.285466	3.582e-06	-0.210526	0.00124104	0.07494	0.154498	1957.38	1733.06	1808.66
ENSG00000138674	SEC31A	0.352506	3.59414e-06	0.337863	1.55345e-05	-0.0146425	0.87044	5703.04	7318.31	7273.15
ENSG00000120029	C10orf76	-0.3885	3.66178e-06	-0.355088	4.27301e-05	0.0334128	0.706714	412.221	341.987	349.393
ENSG00000125844	RRBP1	0.431837	3.67757e-06	0.341208	0.000497152	-0.0906282	0.280989	8988.23	11325.9	10970.6
ENSG00000273841	TAF9	-0.514011	3.78089e-06	-0.523901	3.97538e-06	-0.00989008	0.944456	313.952	245.804	237.504
ENSG00000104324	CPQ	0.749174	3.78408e-06	0.809001	8.94831e-07	0.0598275	0.736223	1882.12	3364.21	3357.72
ENSG00000120088	CRHR1	1.57959	3.78408e-06	1.19237	0.000900738	-0.387224	0.252403	34.0817	103.435	59.2112
ENSG00000102100	SLC35A2	0.45095	3.79099e-06	0.251917	0.0192487	-0.199033	0.00824979	389.899	512.636	425.224
ENSG00000196372	ASB13	-0.691672	3.7948e-06	-0.87088	6.61597e-09	-0.179208	0.172223	1034.23	663.166	566.75
ENSG00000112309	B3GAT2	1.7999	3.85239e-06	1.27431	0.00197646	-0.525587	0.167948	3.68365	26.2956	15.913
ENSG00000110446	SLC15A3	-0.736238	3.86949e-06	-0.392644	0.0263137	0.343594	0.00652612	338.868	171.512	210.833
ENSG00000106038	EVX1	1.56252	3.90491e-06	0.766336	0.0443481	-0.796182	0.00546254	14.9611	66.1447	30.5204
ENSG00000172830	SSH3	-0.576925	3.90491e-06	-0.820447	3.95187e-11	-0.243523	0.0150812	648.634	351.338	306.347
ENSG00000186407	CD300E	-1.76546	3.90491e-06	-0.322818	0.533956	1.44264	1.47769e-05	70.0043	9.94843	31.8555
ENSG00000037280	FLT4	-1.81826	3.91899e-06	-0.482938	0.32969	1.33532	0.000163409	76.8748	10.7575	37.4514
ENSG00000269693	CTD-2192J16.20	1.27407	3.92597e-06	1.01376	0.000453766	-0.26031	0.310681	20.44	54.7976	43.4941
ENSG00000134627	PIWIL4	0.650082	3.93486e-06	0.306028	0.0562737	-0.344054	0.00133239	360.756	592.148	473.974
ENSG00000144152	FBLN7	1.20262	3.96779e-06	0.784187	0.00514537	-0.418433	0.0655985	1430.2	3722.4	2656.62
ENSG00000154822	PLCL2	-0.861172	4.0751e-06	-0.0982953	0.724746	0.762877	2.7675e-08	129.563	74.1286	121.892
ENSG00000171530	TBCA	-0.523649	4.08638e-06	-0.545043	2.54846e-06	-0.0213942	0.874482	1515.03	1220.18	1188.84
ENSG00000115896	PLCL1	-1.79764	4.10749e-06	0.176221	0.76467	1.97386	3.49244e-09	36.4972	6.16632	34.4796
ENSG00000184584	TMEM173	-0.787827	4.16978e-06	-0.652034	0.000265172	0.135793	0.406761	1906.82	967.891	1023.16
ENSG00000166033	HTRA1	1.29758	4.21184e-06	1.635	6.80084e-09	0.337423	0.202314	18730.5	53165.7	71460.3
ENSG00000107338	SHB	-1.22461	4.21459e-06	-0.364881	0.266846	0.85973	4.53834e-05	75.6173	24.5337	44.2448
ENSG00000176531	PHLDB3	-0.799264	4.23085e-06	-0.971438	2.81966e-08	-0.172174	0.285862	182.839	92.8274	84.7858
ENSG00000121897	LIAS	-0.681944	4.23127e-06	-0.811411	5.78829e-08	-0.129467	0.353749	226.473	139.304	131.119
ENSG00000063322	MED29	-0.454746	4.24674e-06	-0.653953	2.71293e-11	-0.199207	0.0105571	1393.13	911.357	817.924
ENSG00000091513	TF	1.56003	4.2627e-06	1.14048	0.00145504	-0.419556	0.2092	4067.25	15396.6	9771.1
ENSG00000176485	PLA2G16	-0.924129	4.26286e-06	-1.31077	5.08211e-11	-0.386644	0.0191386	1104.18	520.575	387.815
ENSG00000198732	SMOC1	1.2231	4.27977e-06	1.47823	3.17784e-08	0.255127	0.322623	3692.79	9592.73	11432.3
ENSG00000105516	DBP	1.25939	4.28158e-06	0.962312	0.00084495	-0.297073	0.25193	231.231	612.296	558.046
ENSG00000168806	LCMT2	0.574783	4.30265e-06	0.374583	0.0054433	-0.200199	0.0449875	183.575	291.154	257.829
ENSG00000111058	ACSS3	-1.11158	4.33951e-06	-1.15481	2.82663e-06	-0.043231	0.887996	232.728	113.504	109.109
ENSG00000181104	F2R	-1.75482	4.33951e-06	-0.0277526	0.967815	1.72706	1.02984e-07	148.996	30.5821	155.902
ENSG00000139044	B4GALNT3	0.685213	4.36206e-06	0.540799	0.000555869	-0.144413	0.287368	1331.15	1971.47	1784.32
ENSG00000120899	PTK2B	-0.885619	4.47222e-06	-0.806093	5.34513e-05	0.0795252	0.706662	470.845	220.943	227.354
ENSG00000177106	EPS8L2	0.590377	4.48637e-06	0.189765	0.229461	-0.400612	2.54625e-05	1604.86	2110.66	1730.47
ENSG00000233608	TWIST2	-0.810291	4.52423e-06	-0.958428	7.69189e-08	-0.148137	0.382787	167.48	89.6416	75.0761
ENSG00000076554	TPD52	0.764813	4.5813e-06	0.450946	0.0134152	-0.313867	0.0193811	472.931	997.888	830.69
ENSG00000160593	AMICA1	-1.95451	4.5813e-06	-0.0952721	0.891458	1.85924	2.32142e-06	45.1998	5.1401	29.192
ENSG00000148337	CIZ1	-0.50629	4.59003e-06	-0.65787	2.56896e-09	-0.151581	0.104252	2330.79	1349.83	1281.53
ENSG00000169714	CNBP	-0.447255	4.61626e-06	-0.612292	2.97386e-10	-0.165037	0.036843	9643.35	7722.01	7005.7
ENSG00000129965	INS-IGF2	1.51144	4.62811e-06	1.28851	0.000169497	-0.222935	0.508886	8.76303	40.5294	28.6406
ENSG00000125503	PPP1R12C	-0.523175	4.64032e-06	-0.400722	0.000875089	0.122453	0.227472	1048.55	610.686	656.367
ENSG00000007047	MARK4	-0.549232	4.73002e-06	-0.648692	8.56083e-08	-0.0994598	0.377449	490.133	307.845	276.726
ENSG00000143753	DEGS1	0.433112	4.76332e-06	0.454454	2.4376e-06	0.0213418	0.84313	1069.44	1667.13	1607.72
ENSG00000198668	CALM1	0.60427	4.8376e-06	0.855145	7.17246e-11	0.250875	0.0174977	3792.03	5558.65	6550.87
ENSG00000100196	KDELR3	0.800003	4.90003e-06	0.870048	9.84137e-07	0.0700454	0.712219	1690.48	3182.61	3063.01
ENSG00000136156	ITM2B	0.601276	4.95127e-06	0.642656	1.59487e-06	0.0413799	0.775315	16163.6	26155.6	27060.2
ENSG00000010803	SCMH1	-0.465146	4.97872e-06	-0.635527	3.72033e-10	-0.170382	0.0395254	1202.45	811.483	736.072
ENSG00000011332	DPF1	1.63703	4.99678e-06	1.57919	1.55366e-05	-0.0578346	0.898241	3.69816	16.8903	12.5997
ENSG00000188976	NOC2L	-0.394204	5.02182e-06	-0.371387	2.98398e-05	0.0228175	0.812246	882.616	595.188	597.43
ENSG00000176678	FOXL1	-0.950407	5.03396e-06	-1.12417	9.05938e-08	-0.173759	0.398503	89.3524	39.6815	37.5627
ENSG00000182732	RGS6	1.74116	5.07029e-06	2.7595	1.40863e-13	1.01834	0.00220845	6.56838	47.6107	100.436
ENSG00000106244	PDAP1	-0.285744	5.23761e-06	-0.306735	1.50905e-06	-0.0209915	0.758078	2205.69	1769.24	1774.09
ENSG00000173198	CYSLTR1	1.04551	5.33227e-06	0.824305	0.000623923	-0.22121	0.302423	181.411	493.291	377.077
ENSG00000188677	PARVB	-0.829317	5.37198e-06	-0.449453	0.0260148	0.379864	0.00923695	517.514	257.978	347.184
ENSG00000005249	PRKAR2B	-1.42086	5.42105e-06	-0.543178	0.138984	0.877681	0.000759139	92.25	35.9795	57.6949
ENSG00000114738	MAPKAPK3	-0.657572	5.50795e-06	-0.130385	0.504882	0.527187	5.86331e-07	417.023	252.206	369.893
ENSG00000154065	ANKRD29	-1.42557	5.5193e-06	0.170882	0.709908	1.59645	1.23949e-10	47.7166	12.716	41.8283
ENSG00000146242	TPBG	0.427659	5.53001e-06	0.361981	0.000222701	-0.0656772	0.460604	806.753	1118.86	1041.55
ENSG00000144895	EIF2A	-0.564704	5.56715e-06	-0.762931	7.18167e-10	-0.198227	0.0523297	3870.58	2953.73	2549.75
ENSG00000250588	IQCJ-SCHIP1	0.742782	5.56715e-06	0.765968	4.32299e-06	0.0231861	0.907943	220.613	383.754	390.75
ENSG00000140044	JDP2	-0.555956	5.56724e-06	-0.230203	0.106822	0.325753	0.000430419	1518.35	914.262	1148.55
ENSG00000197324	LRP10	-0.578358	5.57079e-06	-0.632112	1.00925e-06	-0.0537543	0.689485	7775.87	4468.8	4243.35
ENSG00000107331	ABCA2	0.751367	5.61618e-06	0.601585	0.000522699	-0.149782	0.327954	805.563	1102.1	1026.24
ENSG00000154262	ABCA6	-1.23324	5.64729e-06	-1.03435	0.000253803	0.198892	0.4771	356.689	113.239	130.71
ENSG00000187736	NHEJ1	-0.784684	5.65096e-06	-0.582671	0.00143375	0.202013	0.187825	134.934	84.534	91.0305
ENSG00000165476	REEP3	0.492086	5.67187e-06	0.543732	7.44841e-07	0.0516459	0.643427	1013.83	1730.29	1854.09
ENSG00000095059	DHPS	-0.532478	5.67694e-06	-0.72629	5.20823e-10	-0.193812	0.0434005	737.863	496.887	445.197
ENSG00000167797	CDK2AP2	-0.80774	5.68732e-06	-0.856073	2.26869e-06	-0.0483325	0.810743	737.288	341.931	332.195
ENSG00000078902	TOLLIP	-0.426825	5.73514e-06	-0.48297	4.05e-07	-0.0561454	0.546921	1150.45	787.778	752.262
ENSG00000171443	ZNF524	-0.694439	5.73845e-06	-0.695345	9.01195e-06	-0.000906385	0.996468	218.325	112.36	116.179
ENSG00000080546	SESN1	-0.716429	5.79497e-06	-0.67876	3.01474e-05	0.0376687	0.836399	638.209	430.473	447.128
ENSG00000113593	PPWD1	0.45139	5.86925e-06	0.326724	0.00199062	-0.124666	0.137702	505.346	668.751	614.45
ENSG00000177666	PNPLA2	-0.694355	5.87536e-06	-0.973945	1.56024e-10	-0.27959	0.024555	2247.66	1048.77	879.429
ENSG00000189423	USP32P3	1.21831	5.87536e-06	0.807231	0.0051418	-0.411074	0.0793048	75.5406	159.206	127.789
ENSG00000167004	PDIA3	0.486073	5.88108e-06	0.409543	0.000252534	-0.0765299	0.454785	13119.4	18627.2	17294.6
ENSG00000134748	PRPF38A	-0.363921	5.90032e-06	-0.535898	1.66626e-11	-0.171977	0.00574136	1212.15	948.399	838.413
ENSG00000111231	GPN3	-0.533947	5.91973e-06	-0.728502	5.81475e-10	-0.194554	0.0438395	451.904	369.728	308.143
ENSG00000104635	SLC39A14	-1.1247	5.93802e-06	-1.19559	2.1819e-06	-0.0708897	0.806222	34700.6	15764.7	15239.3
ENSG00000136436	CALCOCO2	-0.546047	5.93802e-06	-0.358676	0.00571257	0.18737	0.059189	1923.38	1412.02	1568.84
ENSG00000164758	MED30	-0.60304	5.93802e-06	-0.619914	5.19169e-06	-0.016874	0.919861	197.678	150.222	140.494
ENSG00000166333	ILK	0.440695	6.04195e-06	0.531383	5.7903e-08	0.0906879	0.301451	1576.75	1974.88	2111.19
ENSG00000124641	MED20	0.684271	6.04355e-06	0.727189	2.31109e-06	0.0429177	0.791311	95.7843	153.015	143.904
ENSG00000137648	TMPRSS4	-1.71252	6.05203e-06	-1.55354	6.40638e-05	0.158978	0.744814	66.8061	10.9693	11.1751
ENSG00000103264	FBXO31	-0.546885	6.1307e-06	-0.577307	2.75937e-06	-0.0304224	0.824475	943.467	572.651	571.821
ENSG00000170296	GABARAP	-0.475378	6.24968e-06	-0.616694	4.6163e-09	-0.141315	0.111821	7201.56	5623.92	4992.29
ENSG00000206297	TAP1	-0.909185	6.26617e-06	-0.591668	0.00628273	0.317517	0.0650142	84.7663	42.4323	54.7157
ENSG00000226173	TAP1	-0.909185	6.26617e-06	-0.591668	0.00628273	0.317517	0.0650142	84.7663	42.4323	54.7157
ENSG00000105607	GCDH	-0.673313	6.26797e-06	-0.733822	1.28215e-06	-0.0605089	0.706888	277.03	171.933	173.31
ENSG00000186564	FOXD2	-0.697863	6.34421e-06	-0.92311	2.21524e-09	-0.225247	0.0845206	678.052	372.957	331.767
ENSG00000175318	GRAMD2	1.15206	6.40404e-06	1.18681	5.03187e-06	0.0347537	0.915568	67.8211	190.876	164.785
ENSG00000241553	ARPC4	-0.41934	6.47546e-06	-0.236212	0.021182	0.183128	0.0123117	1397.89	1208.14	1260.31
ENSG00000175489	LRRC25	-1.75899	6.56263e-06	-0.0616404	0.926552	1.69735	4.40203e-07	58.9539	7.5403	32.6292
ENSG00000148429	USP6NL	0.711215	6.62691e-06	0.466533	0.00601791	-0.244682	0.0610347	648.356	1246.33	1042.31
ENSG00000204178	TMEM57	0.323526	6.64978e-06	0.273942	0.000245317	-0.0495845	0.455469	496.16	658.766	630.974
ENSG00000143776	CDC42BPA	0.391682	6.69151e-06	0.338828	0.000180926	-0.0528544	0.533303	1723.77	2255.52	2287.2
ENSG00000145416	MARCH1	-1.6315	6.69151e-06	0.337714	0.481825	1.96922	5.10949e-11	84.2521	17.9489	86.2934
ENSG00000223802	CERS1	1.36716	6.70982e-06	0.804423	0.0152638	-0.562732	0.0317017	45.5102	133.057	75.2491
ENSG00000105835	NAMPT	-1.32491	6.80185e-06	-1.49199	5.27762e-07	-0.167078	0.603102	12097.5	4354.64	3801.88
ENSG00000107099	DOCK8	0.914492	6.86667e-06	1.51005	3.80343e-14	0.595554	0.00011354	290.52	497.913	756.135
ENSG00000166169	POLL	-0.490369	6.93046e-06	-0.647713	2.9144e-09	-0.157344	0.0851979	373.811	259.98	229.635
ENSG00000163389	POGLUT1	0.56523	6.94823e-06	0.617554	1.31287e-06	0.0523244	0.68867	299.052	483.993	497.776
ENSG00000172236	TPSAB1	-1.94016	6.95951e-06	-0.20206	0.751445	1.7381	0.000346245	108.415	0.933122	40.6711
ENSG00000187908	DMBT1	1.73074	6.98501e-06	1.48442	0.00019231	-0.24632	0.579592	9.10561	47.659	42.3133
ENSG00000135709	KIAA0513	0.63288	7.00259e-06	0.637534	9.66058e-06	0.00465383	0.979464	608.473	912.291	857.899
ENSG00000135899	SP110	-0.769362	7.05755e-06	-0.938348	5.04558e-08	-0.168986	0.282134	449.352	267.657	240.617
ENSG00000232559	GS1-124K5.12	-0.799974	7.05755e-06	-0.532574	0.00520032	0.2674	0.0785377	76.1634	40.0455	46.4469
ENSG00000144647	POMGNT2	0.477479	7.15217e-06	0.474726	1.31131e-05	-0.00275247	0.98282	207.452	287.545	277.25
ENSG00000153214	TMEM87B	0.665286	7.18392e-06	0.689455	5.026e-06	0.0241692	0.89284	611.427	1017.17	1090.03
ENSG00000067445	TRO	0.718215	7.19969e-06	0.480577	0.00515669	-0.237638	0.0750271	513.41	724.087	612.636
ENSG00000134532	SOX5	0.694399	7.2311e-06	0.588021	0.000267196	-0.106378	0.479135	2632.65	4390.88	4306.24
ENSG00000104549	SQLE	0.708926	7.39727e-06	0.701131	1.50396e-05	-0.00779553	0.969424	436.87	771.901	702.613
ENSG00000169957	ZNF768	-0.396617	7.40535e-06	-0.490759	3.33158e-08	-0.0941425	0.227913	748.211	521.33	489.364
ENSG00000111405	ENDOU	-1.47056	7.52794e-06	-1.563	2.93881e-06	-0.0924457	0.829754	28.7986	9.83984	8.3489
ENSG00000115226	FNDC4	-0.656921	7.61058e-06	-0.41994	0.00806025	0.236981	0.0502906	632.798	358.967	405.342
ENSG00000090615	GOLGA3	0.456549	7.65948e-06	0.359919	0.000795521	-0.0966298	0.293151	2241.71	3199.51	2874.82
ENSG00000227816	TAP1	-0.885421	7.65948e-06	-0.596379	0.00492174	0.289042	0.0915611	84.8008	43.1125	54.8877
ENSG00000230705	TAP1	-0.885421	7.65948e-06	-0.596379	0.00492174	0.289042	0.0915611	84.8008	43.1125	54.8877
ENSG00000132780	NASP	-0.502214	7.6861e-06	-0.599044	1.17476e-07	-0.0968297	0.35019	1541.17	1091.77	1019.89
ENSG00000182154	MRPL41	-0.641946	7.74692e-06	-0.630314	1.86307e-05	0.0116321	0.949703	530.8	306.547	302.886
ENSG00000171552	BCL2L1	-0.720036	7.92785e-06	-0.263826	0.171382	0.456211	0.000183409	889.588	484.695	638.655
ENSG00000117643	MAN1C1	-0.947303	7.95716e-06	-0.452788	0.0596467	0.494515	0.00334498	367.012	170.505	257.927
ENSG00000253276	CCDC71L	-1.21433	8.06694e-06	-1.28852	3.11919e-06	-0.0741837	0.819218	733.067	263.52	239.42
ENSG00000131386	GALNT15	-1.26138	8.08793e-06	-1.51086	1.02917e-07	-0.249473	0.374593	39530.4	14325.4	12577.3
ENSG00000205423	CNEP1R1	0.510403	8.08793e-06	0.513834	1.06545e-05	0.00343138	0.9801	161.265	271.768	272.412
ENSG00000213347	MXD3	-1.03148	8.12343e-06	-1.11952	1.83444e-06	-0.0880496	0.740611	121.548	40.0633	37.8562
ENSG00000135541	AHI1	0.678914	8.13707e-06	0.600982	0.000140176	-0.0779324	0.616583	644.046	1010.35	942.645
ENSG00000140650	PMM2	0.395752	8.13707e-06	0.286295	0.00238792	-0.109457	0.142934	624.686	803.307	726.741
ENSG00000159111	MRPL10	-0.526937	8.20222e-06	-0.625907	1.44081e-07	-0.09897	0.367558	674.56	412.694	402.425
ENSG00000143537	ADAM15	-0.656792	8.27273e-06	-0.401424	0.0123013	0.255367	0.0332339	1503.88	806.9	928.504
ENSG00000198771	RCSD1	1.00765	8.29646e-06	0.98665	2.04812e-05	-0.021005	0.942873	164.712	378.63	339.106
ENSG00000163104	SMARCAD1	0.510112	8.35177e-06	0.421103	0.000428756	-0.0890099	0.402402	441.578	650.833	622.455
ENSG00000125810	CD93	-1.77575	8.40156e-06	0.477666	0.343481	2.25341	6.20452e-11	552.563	68.0309	587.445
ENSG00000172346	CSDC2	-1.39057	8.40156e-06	-1.46674	3.75542e-06	-0.0761699	0.848745	119.321	33.2111	31.7611
ENSG00000211451	GNRHR2	0.701606	8.4705e-06	0.484589	0.00399918	-0.217018	0.0743463	37.5115	63.3117	54.5279
ENSG00000214456	PLIN5	-1.67765	8.65562e-06	-2.24257	2.25224e-09	-0.564926	0.141267	83.4006	15.6299	8.08709
ENSG00000142409	ZNF787	-0.424542	8.73521e-06	-0.465355	1.57883e-06	-0.0408128	0.683705	351.959	245.001	232.649
ENSG00000166341	DCHS1	0.668659	8.75699e-06	0.647169	2.79709e-05	-0.0214895	0.907943	2532.73	3587.04	3593.39
ENSG00000070190	DAPP1	-1.9171	8.76829e-06	0.504262	0.346025	2.42136	7.04143e-10	11.7991	1.5116	12.2514
ENSG00000092010	PSME1	-0.539735	8.76829e-06	-0.313012	0.0187784	0.226722	0.0190743	964.596	713.712	830.947
ENSG00000103194	USP10	-0.625849	8.76829e-06	-0.641765	8.01145e-06	-0.0159168	0.928418	717.557	494.377	500.737
ENSG00000149557	FEZ1	-0.554892	8.83364e-06	-0.442093	0.000744714	0.112799	0.324652	391.777	279.735	302.269
ENSG00000100297	MCM5	-0.736241	8.85333e-06	-0.692518	5.02187e-05	0.0437229	0.816837	384.723	197.495	194.062
ENSG00000099219	ERMP1	0.855726	8.93587e-06	0.89153	5.47977e-06	0.0358034	0.878559	450.258	896.943	973.973
ENSG00000066248	NGEF	0.789487	8.99972e-06	0.571307	0.00248922	-0.218181	0.160206	1743.64	2860.6	2446.66
ENSG00000159650	UROC1	1.29294	8.99972e-06	0.902296	0.00361729	-0.390644	0.135923	47.9741	117.986	100.589
ENSG00000169084	DHRSX	-0.598144	9.03255e-06	-0.716821	1.26713e-07	-0.118677	0.342838	559.15	311.247	292.851
ENSG00000051620	HEBP2	-0.68672	9.0653e-06	-0.740959	2.41859e-06	-0.0542395	0.749969	1289.11	831.92	782.079
ENSG00000196458	ZNF605	0.632642	9.08927e-06	0.536362	0.000305574	-0.09628	0.481382	326.856	500.49	451.62
ENSG00000143816	WNT9A	1.1938	9.14674e-06	1.90306	5.43671e-13	0.709259	0.000780655	46.6476	97.3857	156.84
ENSG00000181982	CCDC149	-0.455853	9.15643e-06	-0.582321	1.51037e-08	-0.126468	0.151706	1222.44	832.601	802.459
ENSG00000077942	FBLN1	-1.01797	9.1586e-06	-0.791113	0.00104813	0.226854	0.291652	3106.93	1079	1588.07
ENSG00000060491	OGFR	-0.471177	9.17095e-06	-0.610886	8.92143e-09	-0.139709	0.121326	899.057	569.527	513.878
ENSG00000170017	ALCAM	-0.920223	9.21877e-06	-0.208514	0.447549	0.71171	4.94981e-06	523.653	263.793	450.533
ENSG00000102317	RBM3	-0.719734	9.56665e-06	-0.727513	1.20172e-05	-0.00777934	0.970324	8446.96	5405.34	5374.22
ENSG00000133103	COG6	0.645919	9.61434e-06	0.612359	4.57505e-05	-0.0335601	0.84061	844.13	1501.79	1411.02
ENSG00000213145	CRIP1	1.11423	9.67191e-06	1.88282	2.25318e-14	0.768593	8.81708e-05	1603.58	2945.83	5191.93
ENSG00000117335	CD46	0.454629	9.73246e-06	0.579009	1.80466e-08	0.12438	0.157046	1736.03	2402.53	2722
ENSG00000117091	CD48	-1.97319	9.73542e-06	-0.459733	0.421135	1.51346	0.00187238	28.0695	1.47139	9.28076
ENSG00000007908	SELE	-1.98041	9.93667e-06	0.696766	0.185831	2.67718	2.27476e-09	38.8478	2.07111	68.1086
ENSG00000163131	CTSS	-1.26402	9.93783e-06	0.216765	0.589069	1.48078	2.17029e-11	1067.58	289.974	870.152
ENSG00000109084	TMEM97	-0.677571	1.00053e-05	-0.972384	1.63162e-10	-0.294814	0.017535	251.87	139.347	112.598
ENSG00000130204	TOMM40	-0.481873	1.00108e-05	-0.47131	2.55755e-05	0.0105631	0.939004	561.493	362.316	362.955
ENSG00000058799	YIPF1	-0.57338	1.00949e-05	-0.458369	0.000759035	0.115011	0.335206	414.711	286.782	316.784
ENSG00000196123	KIAA0895L	0.752439	1.02365e-05	0.549165	0.00240006	-0.203274	0.166495	137.088	186.795	157.869
ENSG00000125611	CHCHD5	-0.606081	1.02612e-05	-0.632965	6.26732e-06	-0.0268843	0.869747	242.573	152.297	145.403
ENSG00000064989	CALCRL	-1.92965	1.03235e-05	0.339643	0.57318	2.26929	2.59056e-08	173.569	22.439	260.007
ENSG00000145020	AMT	0.811565	1.03263e-05	0.262912	0.244994	-0.548652	7.10055e-05	272.215	388.315	274.189
ENSG00000198176	TFDP1	0.606106	1.03263e-05	0.671766	1.42766e-06	0.06566	0.643089	554.775	834.764	801.164
ENSG00000169169	CPT1C	0.651141	1.04505e-05	0.454991	0.00392795	-0.19615	0.111238	149.539	215.048	182.451
ENSG00000173846	PLK3	-0.850545	1.04849e-05	-0.533984	0.0105929	0.316561	0.0496849	341.893	160.388	200.445
ENSG00000156232	WHAMM	-0.68969	1.05379e-05	-0.671888	2.88312e-05	0.017802	0.928143	379.323	240.669	246.372
ENSG00000172794	RAB37	-1.00624	1.05763e-05	-1.01374	1.40858e-05	-0.00749809	0.97989	330.783	138.465	143.074
ENSG00000131507	NDFIP1	0.415565	1.06372e-05	0.368743	0.000165859	-0.0468219	0.626253	3757.55	5832.99	5877.82
ENSG00000151883	PARP8	-0.872702	1.06372e-05	-0.200081	0.442415	0.672621	5.7871e-06	123.844	69.9705	104.567
ENSG00000153113	CAST	-0.563929	1.06372e-05	-0.380791	0.00558351	0.183139	0.0869515	4161.14	2973.7	3463.32
ENSG00000079246	XRCC5	-0.27556	1.06556e-05	-0.184581	0.00601628	0.090979	0.0772539	4290.67	3981.32	4261.42
ENSG00000157856	DRC1	1.23402	1.06556e-05	2.00536	2.13846e-13	0.771346	0.000283747	17.8402	39.9345	71.0918
ENSG00000008130	NADK	-0.606229	1.06919e-05	-0.611596	1.41803e-05	-0.00536682	0.975657	1267.68	785.199	765.308
ENSG00000165626	BEND7	-1.04328	1.06919e-05	-1.05877	1.17248e-05	-0.0154925	0.961388	103.02	49.6788	46.2412
ENSG00000143258	USP21	0.508929	1.0746e-05	0.266164	0.0398389	-0.242765	0.00590487	213.444	275.286	232.606
ENSG00000070081	NUCB2	0.692853	1.09149e-05	0.545713	0.00098317	-0.14714	0.307767	4426.72	7896.36	6866.02
ENSG00000159259	CHAF1B	-0.693839	1.09149e-05	-0.917063	6.25684e-09	-0.223225	0.0991635	190.125	103.789	94.1057
ENSG00000183844	FAM3B	-1.64134	1.09583e-05	-1.02101	0.0101206	0.620327	0.0996366	11.0713	2.57595	4.13585
ENSG00000070759	TESK2	-0.586408	1.0963e-05	-0.793052	2.52945e-09	-0.206644	0.0616289	348.023	234.41	196.763
ENSG00000169764	UGP2	0.69391	1.10197e-05	0.705294	1.22647e-05	0.0113832	0.955089	3704.88	7594.01	8098.04
ENSG00000167772	ANGPTL4	-1.41928	1.10501e-05	-1.29425	0.000101261	0.125036	0.745983	8651.43	1702.55	1925.51
ENSG00000113916	BCL6	-0.929376	1.11252e-05	-1.45628	2.71871e-12	-0.526905	0.00148679	12025.8	4574.13	3528.16
ENSG00000161929	SCIMP	-1.69489	1.11699e-05	-0.20413	0.715964	1.49076	8.73894e-06	19.4643	3.80391	10.5575
ENSG00000127184	COX7C	-0.595623	1.12066e-05	-0.729391	8.6676e-08	-0.133768	0.273815	3224.96	2491.24	2224.03
ENSG00000206428	AIF1	-1.70182	1.12198e-05	0.232628	0.676078	1.93444	3.53947e-09	54.2068	7.6631	38.7359
ENSG00000235588	AIF1	-1.70182	1.12198e-05	0.232628	0.676078	1.93444	3.53947e-09	54.2068	7.6631	38.7359
ENSG00000237727	AIF1	-1.70182	1.12198e-05	0.232628	0.676078	1.93444	3.53947e-09	54.2068	7.6631	38.7359
ENSG00000113369	ARRDC3	-0.97399	1.12771e-05	-0.891485	0.000100268	0.0825058	0.739758	3904.28	1861.68	2225.75
ENSG00000122641	INHBA	1.00005	1.12771e-05	1.10457	1.6805e-06	0.104517	0.670853	1590.2	3377.91	3847.65
ENSG00000141448	GATA6	-1.5372	1.12771e-05	-1.10159	0.00281732	0.435611	0.22601	24.7554	4.8143	7.76091
ENSG00000127954	STEAP4	-1.35455	1.13088e-05	-1.06515	0.000996817	0.2894	0.349867	8991.39	3940.15	5041.58
ENSG00000277807	LILRB1	-1.95915	1.13138e-05	0.00742294	0.993281	1.96657	7.05119e-06	26.8427	1.43942	15.7371
ENSG00000178162	FAR2P2	0.89558	1.13362e-05	0.820026	9.62443e-05	-0.0755536	0.731207	89.8374	165.79	152.697
ENSG00000170260	ZNF212	0.457348	1.14022e-05	0.392636	0.000310095	-0.0647123	0.503412	130.836	184.151	170.069
ENSG00000198931	APRT	-0.498358	1.14084e-05	-0.443167	0.000170963	0.0551907	0.638627	637.507	409.116	408.543
ENSG00000003249	DBNDD1	1.39513	1.14323e-05	1.08602	0.00113995	-0.30911	0.312054	14.3421	40.736	32.0152
ENSG00000113296	THBS4	1.32013	1.14323e-05	1.1182	0.000353759	-0.20193	0.526637	3058.16	9423.57	7562.66
ENSG00000102316	MAGED2	0.468452	1.14971e-05	0.256018	0.0309686	-0.212434	0.0112643	7181.08	9942.28	8404.03
ENSG00000140391	TSPAN3	0.582601	1.15239e-05	0.36561	0.0112488	-0.216991	0.0452444	3361.34	5452.53	4452.89
ENSG00000105258	POLR2I	-0.496461	1.15341e-05	-0.659802	5.23129e-09	-0.163341	0.0844676	590.951	381.784	340.566
ENSG00000118946	PCDH17	-1.76505	1.15453e-05	-1.17873	0.00586396	0.586318	0.163878	68.0017	11.07	23.8883
ENSG00000131016	AKAP12	-1.15783	1.15453e-05	-1.18161	1.15492e-05	-0.023787	0.947103	642.859	260.207	246.427
ENSG00000265241	RBM8A	-0.405584	1.15453e-05	-0.445728	2.05356e-06	-0.0401446	0.676756	2372.9	1897.39	1872.25
ENSG00000162413	KLHL21	-0.565254	1.15495e-05	-0.787244	8.02591e-10	-0.22199	0.033798	1626.1	1004.79	895.706
ENSG00000168092	PAFAH1B2	0.387364	1.15908e-05	0.436257	1.07131e-06	0.0488925	0.574315	842.157	1273.64	1306.79
ENSG00000131153	GINS2	-1.07466	1.16553e-05	-0.729853	0.00538091	0.344805	0.114354	55.9013	32.5743	31.895
ENSG00000166200	COPS2	-0.577434	1.16663e-05	-0.520161	0.000138674	0.0572728	0.679177	1981.07	1489.95	1602.59
ENSG00000104976	SNAPC2	-0.568933	1.16788e-05	-0.580221	1.21488e-05	-0.0112883	0.946005	403.632	239.907	236.113
ENSG00000131759	RARA	-0.772191	1.18206e-05	-0.844862	2.31484e-06	-0.0726706	0.701846	1506.09	656.306	646.669
ENSG00000175354	PTPN2	-0.67359	1.18264e-05	-0.763961	9.13766e-07	-0.0903715	0.558803	658.787	428.959	397.35
ENSG00000140749	IGSF6	-1.72802	1.18548e-05	0.262361	0.639418	1.99038	3.49896e-09	99.282	14.0517	67.3925
ENSG00000159167	STC1	-1.85987	1.18994e-05	-2.10939	6.86529e-07	-0.249511	0.651972	1073.07	142.603	92.805
ENSG00000144063	MALL	0.684918	1.20785e-05	0.592104	0.000277648	-0.0928148	0.551661	1276.29	2051.12	2142.12
ENSG00000011028	MRC2	0.80304	1.2225e-05	0.874186	2.72783e-06	0.0711459	0.722725	7070.83	10459.3	11052.9
ENSG00000204472	AIF1	-1.71525	1.22902e-05	0.214105	0.708847	1.92936	7.82034e-09	54.4219	7.55401	38.3895
ENSG00000019582	CD74	-1.34327	1.23529e-05	0.419234	0.270068	1.76251	4.57573e-13	5067.05	1448.55	5541.34
ENSG00000130313	PGLS	-0.496634	1.2414e-05	-0.576779	5.1442e-07	-0.080145	0.461387	707.163	464.755	416.634
ENSG00000122884	P4HA1	0.656051	1.24177e-05	0.441578	0.00617816	-0.214473	0.089145	5181.19	10081.6	8615.24
ENSG00000095777	MYO3A	1.54765	1.24539e-05	1.52813	2.29642e-05	-0.0195145	0.968781	12.1218	54.3437	57.9922
ENSG00000157020	SEC13	0.477211	1.24704e-05	0.420956	0.000207196	-0.0562548	0.609958	1590.45	2161.66	1934.06
ENSG00000204397	CARD16	-1.84482	1.24787e-05	0.0239705	0.973994	1.86879	9.89715e-07	34.6223	4.28319	22.9772
ENSG00000139117	CPNE8	-0.817362	1.25471e-05	-0.640181	0.00114394	0.177181	0.306469	334.087	211.136	242.301
ENSG00000198171	DDRGK1	-0.558067	1.25574e-05	-0.377843	0.00581986	0.180224	0.092499	796.252	451.331	523.245
ENSG00000100299	ARSA	0.562546	1.2559e-05	0.519946	9.39381e-05	-0.0425999	0.761002	412.767	516.014	492.616
ENSG00000141985	SH3GL1	-0.4719	1.2559e-05	-0.397114	0.000433048	0.0747863	0.470312	1704.91	1100.31	1100.88
ENSG00000196353	CPNE4	1.88892	1.27702e-05	1.58665	0.000370721	-0.302275	0.572703	0.177564	13.6413	7.23504
ENSG00000133106	EPSTI1	-1.24507	1.29147e-05	0.0738416	0.874303	1.31891	1.91968e-09	96.2771	29.3456	84.2106
ENSG00000047932	GOPC	0.427353	1.30006e-05	0.368579	0.000302013	-0.0587746	0.53847	939.237	1359.06	1305.23
ENSG00000112335	SNX3	-0.520878	1.30006e-05	-0.449072	0.000305755	0.0718062	0.543214	3110.85	2336.14	2571.86
ENSG00000146070	PLA2G7	-1.84163	1.30773e-05	-0.696051	0.158007	1.14558	0.00550368	23.2249	2.60889	5.67883
ENSG00000056972	TRAF3IP2	-0.797016	1.30997e-05	-0.979378	9.76262e-08	-0.182362	0.275354	1855.69	917.827	804.737
ENSG00000087206	UIMC1	-0.49889	1.31965e-05	-0.473315	6.00571e-05	0.0255746	0.845662	569.288	412.116	420.413
ENSG00000112343	TRIM38	-0.370308	1.33744e-05	-0.358937	3.94683e-05	0.0113713	0.912984	802.135	611.037	631.743
ENSG00000197253	TPSB2	-1.94689	1.33744e-05	-0.0651223	0.93208	1.88177	5.99099e-05	58.2965	1.77174	31.3771
ENSG00000092758	COL9A3	1.14978	1.35022e-05	0.586553	0.0482552	-0.563226	0.0100554	23812.9	60407	35257.6
ENSG00000162757	C1orf74	0.749869	1.35022e-05	0.724452	4.39536e-05	-0.0254168	0.897455	33.696	56.3723	54.3353
ENSG00000087157	PGS1	-0.624616	1.35048e-05	-0.565047	0.000145545	0.059569	0.697361	373.559	216.132	233.323
ENSG00000148110	HIATL1	0.381718	1.3535e-05	0.56416	7.49936e-11	0.182442	0.00664923	853.681	1242.44	1363.38
ENSG00000263001	GTF2I	0.599014	1.35416e-05	0.551417	0.000107521	-0.047597	0.751141	1612.54	2449.21	2287.78
ENSG00000141526	SLC16A3	0.644487	1.35431e-05	0.506965	0.00115016	-0.137523	0.308826	1525.3	2377.51	2187.76
ENSG00000172340	SUCLG2	-0.425463	1.3799e-05	-0.378833	0.000192033	0.04663	0.643338	1113.31	984.72	1016.77
ENSG00000196683	TOMM7	-0.608293	1.38309e-05	-0.899193	8.3353e-11	-0.290901	0.00816847	6027.24	4566.21	3645.07
ENSG00000167994	RAB3IL1	-0.683868	1.41188e-05	-0.765919	1.57883e-06	-0.082051	0.610967	1321.8	682.525	647.388
ENSG00000165092	ALDH1A1	-1.76164	1.41644e-05	0.28541	0.616164	2.04705	6.035e-09	105.595	18.2018	115.509
ENSG00000120896	SORBS3	-0.477511	1.45004e-05	-0.583098	1.37832e-07	-0.105587	0.287217	3461.47	1813.41	1815.04
ENSG00000108799	EZH1	-0.525947	1.4548e-05	-0.645089	1.21047e-07	-0.119142	0.275678	923.876	539.426	533.56
ENSG00000116954	RRAGC	-0.611203	1.45844e-05	-0.277608	0.0865995	0.333595	0.00208827	455.367	348.439	420.559
ENSG00000109906	ZBTB16	-0.991134	1.46235e-05	-1.12518	1.13875e-06	-0.134043	0.572178	867.552	395.956	387.874
ENSG00000116786	PLEKHM2	-0.474253	1.46235e-05	-0.338425	0.00372294	0.135828	0.146655	1439.03	948.108	1001.94
ENSG00000106682	EIF4H	-0.2968	1.46542e-05	-0.442482	6.37459e-11	-0.145682	0.00585224	6344.62	5537.01	5026.3
ENSG00000122642	FKBP9	0.644332	1.46542e-05	0.643996	2.36123e-05	-0.000335394	0.998687	3086.23	4845.37	4533.55
ENSG00000128595	CALU	0.542703	1.48003e-05	0.779254	3.4598e-10	0.236551	0.0174629	5881.19	8890	10157
ENSG00000109743	BST1	-1.03346	1.48259e-05	-0.390651	0.167443	0.642806	0.000693172	79.7677	32.3649	52.3247
ENSG00000125730	C3	-1.50809	1.48892e-05	-1.57059	9.00539e-06	-0.0624938	0.895251	2931.93	574.595	642.889
ENSG00000164176	EDIL3	0.737821	1.48926e-05	0.4911	0.00740013	-0.246721	0.0859877	11294.6	23410.4	19758.8
ENSG00000099622	CIRBP	-0.614749	1.4981e-05	-0.935005	2.61815e-11	-0.320257	0.00361257	9362.99	6073.14	4832.76
ENSG00000109705	NKX3-2	0.966638	1.4981e-05	0.836655	0.000314407	-0.129983	0.570527	357.145	777.224	642.391
ENSG00000133195	SLC39A11	0.879678	1.50678e-05	0.668762	0.00185241	-0.210916	0.25122	232.018	457.491	335.827
ENSG00000158985	CDC42SE2	-0.483073	1.50678e-05	-0.237963	0.0594214	0.24511	0.00441306	465.717	384.182	459.435
ENSG00000173473	SMARCC1	-0.518637	1.50678e-05	-0.382701	0.00261956	0.135936	0.193239	844.04	619.03	659.922
ENSG00000165171	WBSCR27	-1.18056	1.50694e-05	-1.25388	6.09461e-06	-0.0733204	0.828379	39.5256	11.9201	15.0292
ENSG00000071054	MAP4K4	-0.86053	1.52522e-05	-0.149168	0.593651	0.711363	1.45099e-06	2102.68	985.23	1622.85
ENSG00000198860	TSEN15	0.570943	1.53497e-05	0.705432	1.00894e-07	0.13449	0.245406	286.714	488.504	512.376
ENSG00000163328	GPR155	0.759189	1.54023e-05	1.21311	2.03625e-12	0.453919	0.000634395	213.415	354.969	510.605
ENSG00000125304	TM9SF2	0.344854	1.55522e-05	0.387952	1.58297e-06	0.0430976	0.58801	3148.8	4541.84	4622.3
ENSG00000122122	SASH3	-1.82884	1.55741e-05	0.159772	0.80578	1.98861	1.76353e-07	75.894	8.44323	44.8219
ENSG00000112039	FANCE	-0.787578	1.5592e-05	-0.717877	0.00014464	0.0697008	0.730224	110.522	59.3357	61.8746
ENSG00000130427	EPO	1.65168	1.5592e-05	1.53351	8.90204e-05	-0.118166	0.791498	2.41706	14.0223	13.4451
ENSG00000173083	HPSE	-1.66228	1.57587e-05	-0.0140594	0.984075	1.64822	5.02385e-07	42.0995	5.87189	23.9732
ENSG00000277053	GTF2IP1	0.601006	1.57587e-05	0.530483	0.000241608	-0.0705236	0.618384	750.845	1164.41	1154.83
ENSG00000156642	NPTN	0.449214	1.58954e-05	0.502721	1.86938e-06	0.0535065	0.610521	3214.31	4566.42	4778.35
ENSG00000169228	RAB24	-0.501898	1.59077e-05	-0.835091	3.01167e-13	-0.333193	0.000132949	600.047	394.06	301.449
ENSG00000136205	TNS3	0.719788	1.59868e-05	0.415626	0.0237335	-0.304161	0.024236	6715.07	10815.4	8973.82
ENSG00000198909	MAP3K3	-0.37712	1.59978e-05	-0.371915	3.39922e-05	0.00520478	0.962679	1319.08	967.044	943.586
ENSG00000128335	APOL2	-0.609676	1.60631e-05	-0.606339	2.88229e-05	0.00333647	0.984991	638.317	400.911	393.488
ENSG00000173660	UQCRH	-0.463214	1.61038e-05	-0.575226	9.69372e-08	-0.112012	0.238631	2101.86	1668.17	1528.89
ENSG00000181827	RFX7	0.521248	1.61443e-05	0.603261	7.3761e-07	0.0820135	0.472848	311.539	422.454	463.563
ENSG00000103126	AXIN1	-0.344787	1.61645e-05	-0.304389	0.000244089	0.0403977	0.619271	528.295	342.105	344.424
ENSG00000165775	FUNDC2	-0.439924	1.62493e-05	-0.512504	6.57737e-07	-0.0725801	0.454022	1704.12	1329.47	1259.63
ENSG00000174007	CEP19	0.745358	1.62493e-05	0.822931	2.56536e-06	0.0775727	0.655724	64.0147	109.292	111.73
ENSG00000100296	THOC5	-0.538866	1.6295e-05	-0.507573	8.23816e-05	0.0312929	0.824626	465.477	295.723	300.537
ENSG00000065618	COL17A1	-1.92791	1.66986e-05	0.00716496	0.99335	1.93507	3.45515e-05	33.8478	1.46481	11.8822
ENSG00000112394	SLC16A10	1.10402	1.67139e-05	1.44997	1.4157e-08	0.345949	0.126702	153.268	365.556	491.846
ENSG00000144815	NXPE3	0.524019	1.67804e-05	0.589983	1.69755e-06	0.0659646	0.585498	407.76	593.678	617.195
ENSG00000170540	ARL6IP1	-0.544228	1.6837e-05	-0.62288	1.12829e-06	-0.0786525	0.525851	1204.8	996.172	956.548
ENSG00000077684	JADE1	-0.577821	1.68962e-05	-0.804916	1.65065e-09	-0.227096	0.0375256	1440.47	979.797	842.892
ENSG00000164743	C8orf48	0.785278	1.68962e-05	0.730554	9.82828e-05	-0.0547235	0.769655	32.6939	63.036	62.5587
ENSG00000065615	CYB5R4	-0.840058	1.69934e-05	-0.3595	0.113914	0.480558	0.00160661	391.791	240.068	322.125
ENSG00000106560	GIMAP2	-1.32572	1.70551e-05	-0.121573	0.79758	1.20415	7.23099e-07	71.849	22.6327	63.4725
ENSG00000177105	RHOG	-0.512696	1.70551e-05	-0.234428	0.0870446	0.278268	0.00228333	452.514	296.701	352.13
ENSG00000221963	APOL6	-0.560644	1.71382e-05	-0.330041	0.0209807	0.230602	0.02785	603.606	447.962	529.18
ENSG00000165752	STK32C	-0.778133	1.71711e-05	-0.91298	5.9927e-07	-0.134847	0.447363	98.2334	54.2399	49.7629
ENSG00000100129	EIF3L	-0.607236	1.72656e-05	-0.87821	3.49582e-10	-0.270975	0.0159617	10918.4	7815.79	6296.87
ENSG00000132471	WBP2	-0.642902	1.73059e-05	-1.03796	1.72862e-12	-0.395058	0.000505968	4437.27	2366.6	1879.63
ENSG00000166337	TAF10	-0.555857	1.73569e-05	-0.620729	2.21994e-06	-0.0648727	0.625016	670.81	460.663	426.528
ENSG00000125149	C16orf70	0.518065	1.73663e-05	0.52969	1.72159e-05	0.011625	0.936604	144.937	219.329	215.397
ENSG00000125352	RNF113A	-0.478543	1.73782e-05	-0.583397	1.95646e-07	-0.104854	0.297335	381.643	273.548	252.777
ENSG00000167703	SLC43A2	-1.41193	1.7578e-05	-0.804438	0.026098	0.60749	0.0395311	210.703	69.4358	109.8
ENSG00000170832	USP32	-0.519437	1.77343e-05	-0.32696	0.0128258	0.192477	0.0518931	576.378	398.816	444.277
ENSG00000125629	INSIG2	0.585667	1.7808e-05	0.370534	0.0124779	-0.215134	0.0536999	565.814	1037.91	852.132
ENSG00000102595	UGGT2	0.578023	1.78494e-05	0.307473	0.0414196	-0.27055	0.0104501	1274.37	2158.65	1832.26
ENSG00000163655	GMPS	-0.553053	1.78555e-05	-0.433975	0.00138973	0.119078	0.309721	925.204	706.494	756.511
ENSG00000182158	CREB3L2	0.591911	1.79415e-05	0.409474	0.00563649	-0.182437	0.118991	4027.77	6339.44	5787.87
ENSG00000215012	C22orf29	0.504849	1.79858e-05	0.418856	0.000681608	-0.0859936	0.427758	177.352	243.846	211.216
ENSG00000163563	MNDA	-1.82039	1.80689e-05	0.134493	0.841027	1.95489	3.39488e-07	92.2653	14.7105	58.0536
ENSG00000166025	AMOTL1	0.658741	1.80689e-05	0.598868	0.000168268	-0.0598732	0.717204	1692.75	2834.41	2720.81
ENSG00000178386	ZNF223	0.786097	1.81032e-05	0.700552	0.000232435	-0.0855446	0.640564	44.2341	80.1375	75.8205
ENSG00000018236	CNTN1	-1.82032	1.83602e-05	-0.664477	0.187154	1.15584	0.00511554	121.011	10.9049	27.883
ENSG00000153162	BMP6	1.10315	1.84502e-05	1.44551	1.83821e-08	0.342367	0.135923	382.014	886.601	1172.09
ENSG00000104856	RELB	-0.90901	1.8911e-05	-0.513067	0.0286713	0.395943	0.0244394	170.614	74.9792	92.3411
ENSG00000215154	AC141586.5	0.698868	1.90246e-05	0.723401	1.3741e-05	0.0245336	0.894265	37.3312	57.5276	61.7932
ENSG00000189369	GSPT2	0.488218	1.94939e-05	0.312676	0.0115346	-0.175542	0.0526026	190.519	280.741	256.411
ENSG00000134590	FAM127A	0.424558	1.99127e-05	0.285416	0.00767667	-0.139141	0.0913605	1455.86	1843.94	1678.6
ENSG00000204822	MRPL53	-0.642576	1.99523e-05	-0.731662	1.57726e-06	-0.0890856	0.553714	606.789	361.353	341.738
ENSG00000163251	FZD5	-0.959694	2.01006e-05	-1.04699	4.57399e-06	-0.0873006	0.729567	173.042	87.2953	76.8774
ENSG00000163050	ADCK3	-0.556575	2.02838e-05	-0.800008	6.55927e-10	-0.243433	0.0198261	593.691	405.097	348.001
ENSG00000177034	MTX3	0.479248	2.02838e-05	0.481754	2.81174e-05	0.00250611	0.985502	361.554	545.458	537.893
ENSG00000014164	ZC3H3	-0.551614	2.05771e-05	-0.5122	0.000129517	0.039414	0.783125	273.889	156.137	156.588
ENSG00000060982	BCAT1	-0.631339	2.06155e-05	-0.855535	6.80084e-09	-0.224196	0.0679773	17603.4	12331.3	11076.1
ENSG00000156253	RWDD2B	0.517966	2.0711e-05	0.499978	6.37355e-05	-0.0179873	0.901229	286.89	446.037	436.568
ENSG00000173598	NUDT4	-0.611548	2.07359e-05	-0.48937	0.00118164	0.122178	0.359426	2872.44	2305.86	2578.49
ENSG00000188811	NHLRC3	0.526037	2.0766e-05	0.452114	0.000445234	-0.073923	0.540431	458.575	674.142	640.735
ENSG00000175938	ORAI3	-0.575185	2.0855e-05	-0.614656	7.83491e-06	-0.0394702	0.791115	720.215	455.649	453.244
ENSG00000154016	GRAP	-1.44924	2.10091e-05	-0.205763	0.672834	1.24348	1.01229e-05	37.5637	6.70762	16.264
ENSG00000175356	SCUBE2	1.31109	2.1405e-05	0.892179	0.0068959	-0.418909	0.141233	182.954	610.559	442.774
ENSG00000134569	LRP4	0.771145	2.14886e-05	1.12906	2.94173e-10	0.357916	0.0124549	181.847	284.222	375.507
ENSG00000100568	VTI1B	-0.420101	2.1656e-05	-0.252345	0.0197454	0.167756	0.0344065	1226.54	967.948	1057.38
ENSG00000182118	FAM89A	-0.747518	2.16659e-05	-0.903393	3.41456e-07	-0.155875	0.342956	354.519	237.919	200.887
ENSG00000105127	AKAP8	-0.430958	2.18208e-05	-0.503553	8.94546e-07	-0.0725948	0.452061	587.204	381.639	379.332
ENSG00000213699	SLC35F6	-0.397623	2.19833e-05	-0.162768	0.139559	0.234855	0.000832787	459.118	342.057	401.731
ENSG00000147113	CXorf36	-1.79208	2.19845e-05	0.104227	0.879907	1.89631	5.68153e-07	128.422	15.5635	101.441
ENSG00000106333	PCOLCE	1.09265	2.20374e-05	1.09555	3.17894e-05	0.00290042	0.992836	7046.2	14591.5	13639.3
ENSG00000100938	GMPR2	-0.422288	2.22759e-05	-0.625231	2.14607e-10	-0.202944	0.00892313	1610.5	1201.34	1081.97
ENSG00000167969	ECI1	-0.533195	2.22759e-05	-0.587557	4.28147e-06	-0.0543616	0.682003	340.35	233.587	204.299
ENSG00000069399	BCL3	-0.829588	2.2309e-05	-0.853196	1.92821e-05	-0.0236085	0.924691	849.016	346.77	365.878
ENSG00000175764	TTLL11	0.564563	2.2309e-05	0.512308	0.000204838	-0.0522552	0.695209	76.1722	116.718	109.896
ENSG00000019144	PHLDB1	0.545874	2.27826e-05	0.566648	1.63226e-05	0.0207738	0.893436	1752.7	2262.23	2306.06
ENSG00000109667	SLC2A9	-1.09491	2.3041e-05	-0.567985	0.0492525	0.526928	0.0155105	49.8995	22.1147	33.0066
ENSG00000138722	MMRN1	-1.89382	2.31394e-05	-0.472627	0.405639	1.4212	0.00370947	150.15	8.39295	49.1274
ENSG00000198598	MMP17	-1.54928	2.32085e-05	-0.565025	0.19463	0.984253	0.00242165	38.9958	8.16387	17.1043
ENSG00000111678	C12orf57	-0.572054	2.37054e-05	-0.839602	3.49582e-10	-0.267548	0.0122435	4849.67	3101.51	2544.15
ENSG00000186642	PDE2A	-1.31926	2.37054e-05	-0.563138	0.120151	0.756124	0.00410686	126.727	42.4209	83.1892
ENSG00000104998	IL27RA	0.700713	2.37623e-05	0.971339	3.41826e-09	0.270626	0.0380878	85.9981	138.647	159.67
ENSG00000234836	AIF1	-1.6567	2.385e-05	0.299465	0.578791	1.95617	3.63663e-09	53.1499	7.78058	39.3336
ENSG00000089693	MLF2	0.300144	2.40581e-05	0.158139	0.0472505	-0.142005	0.00972218	2285.58	2732.98	2479.09
ENSG00000072952	MRVI1	-1.46307	2.43776e-05	-0.196516	0.69648	1.26656	9.04179e-06	70.8645	21.697	70.0331
ENSG00000099995	SF3A1	-0.51413	2.44105e-05	-0.547426	1.00422e-05	-0.0332963	0.804797	2571.7	1440.4	1468.76
ENSG00000197557	TTC30A	0.583231	2.44794e-05	0.469447	0.00118937	-0.113784	0.36324	184.384	309.602	311.638
ENSG00000124786	SLC35B3	0.477909	2.48437e-05	0.506344	1.12848e-05	0.0284349	0.819171	317.508	507.103	493.921
ENSG00000179598	PLD6	-0.970703	2.49868e-05	-1.01179	1.59018e-05	-0.0410885	0.8882	49.7136	24.072	24.3981
ENSG00000100336	APOL4	-0.798678	2.505e-05	-0.710718	0.00029612	0.0879605	0.660001	282.443	155.117	183.901
ENSG00000086062	B4GALT1	-0.821288	2.51909e-05	-0.368231	0.102055	0.453057	0.00300539	1516.4	786.074	1044.04
ENSG00000140105	WARS	-0.664739	2.52243e-05	-0.415248	0.0155395	0.24949	0.0549785	1099.16	703.418	800.677
ENSG00000130283	GDF1	1.52969	2.52322e-05	1.10727	0.00400608	-0.422416	0.226263	6.99478	23.615	13.759
ENSG00000184640	SEPT9	-0.498611	2.52981e-05	-0.349741	0.00573205	0.148869	0.13957	2368.69	1479.06	1681.95
ENSG00000243678	NME1-NME2	-0.47662	2.54201e-05	-0.49371	1.92203e-05	-0.0170907	0.900865	5399	3857.64	3607.9
ENSG00000213551	DNAJC9	-0.388914	2.54365e-05	-0.410722	1.2889e-05	-0.0218082	0.834277	416.753	313.598	302.177
ENSG00000174807	CD248	-1.63428	2.55982e-05	0.239075	0.667919	1.87336	1.01485e-08	229.56	22.8735	127.965
ENSG00000229715	EEF1DP3	-1.66443	2.55982e-05	-1.27155	0.00208062	0.392878	0.385795	12.3392	2.4519	4.00662
ENSG00000132823	OSER1	-0.576269	2.56117e-05	-0.84026	5.61347e-10	-0.263991	0.0151113	877.497	624.385	522.9
ENSG00000163565	IFI16	-0.528742	2.57928e-05	-0.308344	0.0258517	0.220399	0.0286642	2448.46	1787.87	2193.01
ENSG00000172954	LCLAT1	0.562063	2.60033e-05	0.666041	7.07491e-07	0.103978	0.391751	160.183	270.221	289.336
ENSG00000109265	KIAA1211	1.25351	2.6149e-05	0.996128	0.00145069	-0.257379	0.385589	121.241	344.868	229.018
ENSG00000141002	TCF25	-0.362526	2.64944e-05	-0.366664	3.27126e-05	-0.00413811	0.969905	1845.1	1342.78	1305.66
ENSG00000133574	GIMAP4	-1.72461	2.65073e-05	0.429419	0.417685	2.15403	1.61846e-09	163.97	22.4644	153.741
ENSG00000153487	ING1	-0.761802	2.65073e-05	-1.02199	1.51814e-08	-0.260184	0.0901252	1263.35	643.787	570.209
ENSG00000071205	ARHGAP10	-0.498003	2.65971e-05	-0.392893	0.00162315	0.10511	0.331597	519.766	381.104	415.697
ENSG00000121417	ZNF211	0.543951	2.66235e-05	0.617337	2.28105e-06	0.0733863	0.550892	98.2235	122.383	136.596
ENSG00000163930	BAP1	-0.309021	2.68435e-05	-0.31286	3.27921e-05	-0.00383834	0.967019	1163.92	896.049	857.509
ENSG00000101440	ASIP	1.08593	2.68861e-05	0.701607	0.0120053	-0.384322	0.0792724	40.9705	84.0662	62.3097
ENSG00000137955	RABGGTB	-0.581878	2.69742e-05	-0.615574	1.29375e-05	-0.033697	0.830155	1203.82	901.351	883.998
ENSG00000134597	RBMX2	-0.456011	2.69846e-05	-0.517498	2.4376e-06	-0.0614872	0.567935	513.448	390.172	380.515
ENSG00000184007	PTP4A2	-0.484042	2.70281e-05	-0.264294	0.0397622	0.219748	0.0157284	2848.58	2322.82	2784.76
ENSG00000086991	NOX4	-1.42775	2.70955e-05	-1.13965	0.00136592	0.288103	0.422999	208.908	58.4454	80.508
ENSG00000258315	C17orf49	-0.561494	2.70955e-05	-0.339714	0.0202439	0.221781	0.0409635	682.932	436.669	485.897
ENSG00000167468	GPX4	-0.578303	2.72013e-05	-0.688387	7.07452e-07	-0.110084	0.393643	4254.29	2419.81	2279.79
ENSG00000170191	NANP	0.52506	2.72013e-05	0.472645	0.000261696	-0.0524158	0.675275	114.749	184.522	174.347
ENSG00000101911	PRPS2	-0.469081	2.74057e-05	-0.387068	0.000943216	0.0820129	0.438046	454.801	341.039	346.081
ENSG00000120162	MOB3B	-0.955613	2.74573e-05	-0.229633	0.440067	0.72598	2.9593e-05	80.8566	39.9894	66.1423
ENSG00000168938	PPIC	0.930398	2.75277e-05	1.04012	3.6218e-06	0.109718	0.640977	1019.64	2012.19	2017.87
ENSG00000133030	MPRIP	-0.470662	2.76158e-05	-0.427894	0.000232337	0.0427675	0.721695	3065.64	1992.85	2062.64
ENSG00000145908	ZNF300	-0.520147	2.78815e-05	-0.645986	2.12466e-07	-0.125839	0.256175	399.659	272.104	254.657
ENSG00000103489	XYLT1	0.868748	2.8048e-05	0.524707	0.0207286	-0.344041	0.0462018	4321.86	8943.44	7298.34
ENSG00000106605	BLVRA	-0.59392	2.81434e-05	-0.525209	0.000363772	0.0687105	0.639502	837.942	602.574	607.508
ENSG00000163820	FYCO1	-0.397704	2.82068e-05	-0.115884	0.33344	0.28182	5.22341e-05	923.731	659.663	838.672
ENSG00000151748	SAV1	-0.678968	2.85238e-05	-0.874835	6.92301e-08	-0.195866	0.164162	2630.26	1890.58	1675.75
ENSG00000170293	CMTM8	-0.990343	2.85238e-05	-1.08348	7.13263e-06	-0.0931329	0.731207	40.8187	24.1952	22.8117
ENSG00000143498	TAF1A	0.652249	2.86201e-05	0.638797	6.4013e-05	-0.0134518	0.942873	61.2893	110.988	108.245
ENSG00000116005	PCYOX1	0.513572	2.88115e-05	0.320689	0.0164639	-0.192882	0.0539836	3256.07	4748.64	4358.97
ENSG00000099840	IZUMO4	-1.16376	2.89059e-05	-1.77237	1.3532e-10	-0.608609	0.0119214	71.6225	20.3397	13.3867
ENSG00000197406	DIO3	-1.41128	2.92411e-05	-1.59357	2.83594e-06	-0.182287	0.637798	1518.44	339.981	314.386
ENSG00000139197	PEX5	-0.485019	2.92632e-05	-0.500657	2.41938e-05	-0.0156387	0.912928	927.229	663.346	639.36
ENSG00000144218	AFF3	0.849037	2.93526e-05	0.527769	0.0170543	-0.321268	0.0577951	459.207	811.146	730.079
ENSG00000088756	ARHGAP28	-1.01985	2.9449e-05	-0.143076	0.686525	0.876774	2.00998e-06	229.145	95.5691	177.327
ENSG00000170899	GSTA4	0.455531	2.9449e-05	0.167755	0.2018	-0.287776	0.000390987	1101.79	1592.04	1335.96
ENSG00000214274	ANG	-0.62067	2.9449e-05	-0.84857	9.40559e-09	-0.2279	0.0633123	918.79	612.847	544.034
ENSG00000100209	HSCB	-0.573904	2.96327e-05	-0.682232	8.62762e-07	-0.108329	0.401239	250.654	203.453	179.69
ENSG00000142166	IFNAR1	-0.392284	2.98698e-05	-0.0722296	0.582019	0.320054	2.34964e-06	1071.73	889.556	1047.28
ENSG00000170989	S1PR1	-1.42062	3.06879e-05	-0.103142	0.849386	1.31748	1.83853e-06	200.64	46.3873	148.945
ENSG00000185291	IL3RA	-1.81017	3.0847e-05	-0.275165	0.655003	1.53501	0.000203722	54.7367	6.23413	26.6549
ENSG00000101331	CCM2L	-1.87856	3.08722e-05	-0.0364263	0.963417	1.84213	6.16758e-05	25.957	1.66573	16.6242
ENSG00000073737	DHRS9	-1.84484	3.10603e-05	-0.678401	0.193646	1.16644	0.0102158	27.7502	2.55012	6.88226
ENSG00000237172	B3GNT9	0.55679	3.11587e-05	0.35449	0.0145803	-0.2023	0.0648585	1288.59	1828.48	1612.2
ENSG00000064489	MEF2BNB-MEF2B	-0.742476	3.12313e-05	-0.806115	8.85668e-06	-0.063639	0.747707	161.602	85.1042	79.7007
ENSG00000148288	GBGT1	-0.528815	3.13263e-05	-0.460951	0.000479482	0.0678638	0.594504	277.939	187.162	197.227
ENSG00000147164	SNX12	-0.3975	3.13497e-05	-0.291507	0.00403168	0.105993	0.198427	626.289	493.597	533.367
ENSG00000131748	STARD3	-0.464329	3.14219e-05	-0.3807	0.0011157	0.0836287	0.425926	514.031	337.213	364.946
ENSG00000160049	DFFA	-0.460662	3.14219e-05	-0.319051	0.00710167	0.141611	0.128595	642.062	484.128	522.4
ENSG00000164252	AGGF1	0.337627	3.14219e-05	0.393171	1.48084e-06	0.0555432	0.460325	558.68	765.895	792.013
ENSG00000088826	SMOX	-1.15762	3.16486e-05	-1.19758	2.38703e-05	-0.0399606	0.912809	1117.45	259.562	241.368
ENSG00000130558	OLFM1	-0.783697	3.19689e-05	-0.981491	2.02906e-07	-0.197795	0.245403	815.421	412.014	363.18
ENSG00000203877	RIPPLY2	1.33952	3.23058e-05	1.20789	0.000257794	-0.131635	0.668407	3.62085	10.9732	10.8118
ENSG00000128228	SDF2L1	-0.630607	3.24375e-05	-0.494341	0.00197801	0.136266	0.331475	242.159	151.167	154.595
ENSG00000166012	TAF1D	-0.62903	3.25178e-05	-0.692657	6.38214e-06	-0.0636268	0.690083	1483.46	1026.44	991.951
ENSG00000133561	GIMAP6	-1.76587	3.25936e-05	0.412233	0.458002	2.1781	9.08224e-09	178.741	23.855	183.52
ENSG00000140839	CLEC18B	1.37445	3.29134e-05	0.678718	0.0703236	-0.695729	0.0155656	72.8872	199.663	118.365
ENSG00000141424	SLC39A6	0.391225	3.31416e-05	0.168045	0.127006	-0.223179	0.00172354	2872.86	4046.94	3523.18
ENSG00000158473	CD1D	-1.21558	3.36791e-05	-1.15805	0.000123167	0.0575306	0.880413	61.1043	26.7439	23.9689
ENSG00000162817	C1orf115	-1.08648	3.38818e-05	-0.431225	0.163739	0.655252	0.00188244	129.966	57.6207	102.844
ENSG00000113583	C5orf15	0.642944	3.3932e-05	0.468287	0.00456347	-0.174657	0.197986	2365.62	4365.5	3819.69
ENSG00000281887	GIMAP1-GIMAP5	-1.81379	3.4086e-05	0.0568961	0.939585	1.87069	4.80386e-06	63.641	5.873	47.0911
ENSG00000064763	FAR2	-1.41543	3.41001e-05	0.46466	0.262233	1.88009	1.03889e-11	56.642	12.6089	62.2059
ENSG00000159792	PSKH1	-0.446339	3.41923e-05	-0.373406	0.000913117	0.0729327	0.479276	488.91	351.399	349.822
ENSG00000216490	IFI30	-1.44386	3.42062e-05	0.176795	0.733122	1.62065	6.93683e-09	1073.87	213.206	695.699
ENSG00000248333	CDK11B	-0.314517	3.44363e-05	-0.271145	0.000598707	0.0433722	0.559929	809.993	648.827	661.712
ENSG00000162894	FAIM3	-1.17278	3.46115e-05	-1.58581	2.00126e-08	-0.413024	0.109911	87.5582	32.2881	22.0252
ENSG00000206535	LNP1	0.695976	3.46945e-05	0.346693	0.068972	-0.349283	0.00718766	173.55	295.661	243.779
ENSG00000123728	RAP2C	0.439464	3.48916e-05	0.358061	0.00130237	-0.0814031	0.403791	396.479	566.85	542.028
ENSG00000111737	RAB35	-0.422453	3.529e-05	-0.157187	0.200239	0.265266	0.000516251	630.012	418.572	507.84
ENSG00000091106	NLRC4	-1.80331	3.54075e-05	0.0687418	0.925183	1.87205	3.6205e-06	16.028	2.40128	13.0089
ENSG00000214176	PLEKHM1P	-0.711168	3.568e-05	-0.879027	3.57326e-07	-0.167859	0.285876	461.354	218.443	191.525
ENSG00000143418	CERS2	-0.411299	3.61642e-05	-0.421391	3.43603e-05	-0.0100918	0.934878	3861.08	3073.83	3105.2
ENSG00000243660	ZNF487	-0.613178	3.61973e-05	-0.675652	7.67679e-06	-0.0624744	0.691617	127.732	90.7893	83.0916
ENSG00000156535	CD109	0.753854	3.62073e-05	0.947129	2.20088e-07	0.193275	0.237098	4310.36	7421.07	8838.25
ENSG00000188554	NBR1	-0.26175	3.62646e-05	-0.293993	4.57545e-06	-0.0322431	0.611442	3870.23	3488.76	3376.6
ENSG00000034510	TMSB10	-1.01301	3.62843e-05	-0.168126	0.62894	0.844884	5.6693e-06	4230.25	1418.46	2506.46
ENSG00000260549	MT1L	-1.00039	3.63523e-05	-1.0294	3.13487e-05	-0.029009	0.926517	370.972	167.225	167.919
ENSG00000168734	PKIG	-0.540427	3.63877e-05	-0.602904	5.3455e-06	-0.0624768	0.643455	2284.85	1407.51	1340.16
ENSG00000142185	TRPM2	-1.69977	3.66654e-05	0.040991	0.954606	1.74076	1.62235e-06	53.8557	5.69223	28.017
ENSG00000197296	FITM2	0.421037	3.67572e-05	0.412577	8.24798e-05	-0.00846055	0.947023	307.31	445.612	419.154
ENSG00000121749	TBC1D15	-0.526507	3.7067e-05	-0.557491	1.7822e-05	-0.0309842	0.829529	1444.07	1136.96	1118.98
ENSG00000163607	GTPBP8	-0.438002	3.71431e-05	-0.373317	0.000720398	0.0646853	0.526376	149.374	121.282	131.517
ENSG00000137673	MMP7	-1.72587	3.72893e-05	-0.769783	0.106365	0.956083	0.0204605	21.5379	3.59312	7.63319
ENSG00000164932	CTHRC1	1.23447	3.76778e-05	1.10371	0.000369333	-0.130762	0.70032	926.765	2510.81	1867.25
ENSG00000233476	EEF1A1P6	-0.684297	3.82357e-05	-0.830834	7.07491e-07	-0.146537	0.342825	158.264	123.888	108.57
ENSG00000141428	C18orf21	-0.500684	3.82782e-05	-0.532756	1.6236e-05	-0.0320718	0.811388	271.401	203.105	204.14
ENSG00000152082	MZT2B	-0.611971	3.83094e-05	-0.859549	5.65096e-09	-0.247577	0.040383	1689.37	1099.33	890.388
ENSG00000166997	CNPY4	0.733882	3.83461e-05	0.609166	0.00108685	-0.124716	0.467248	556.365	975.23	853.33
ENSG00000256043	CTSO	0.515116	3.84335e-05	0.632639	4.59395e-07	0.117523	0.291327	561.146	911.555	985.034
ENSG00000263238	CTSO	0.515116	3.84335e-05	0.632639	4.59395e-07	0.117523	0.291327	561.146	911.555	985.034
ENSG00000133773	CCDC59	-0.521109	3.87233e-05	-0.692668	4.06864e-08	-0.17156	0.106295	607.098	471.848	432.143
ENSG00000184060	ADAP2	-1.37536	3.87233e-05	0.373927	0.38041	1.74928	5.10949e-11	132.346	26.1171	105.234
ENSG00000179300	ZCCHC5	1.01088	3.87533e-05	0.757504	0.00360421	-0.253372	0.25726	72.51	174.548	141.096
ENSG00000161835	GRASP	-1.19538	3.88158e-05	0.0452845	0.927372	1.24066	2.7675e-08	60.7973	17.1683	53.9747
ENSG00000125775	SDCBP2	-0.808717	3.89766e-05	-0.924027	3.54152e-06	-0.11531	0.568326	69.6815	38.4858	36.4334
ENSG00000018280	SLC11A1	-1.49231	3.90279e-05	-0.511115	0.245984	0.981191	0.00187433	159.881	35.1048	73.8941
ENSG00000167384	ZNF180	0.51056	3.90279e-05	0.45682	0.000385787	-0.0537403	0.66494	135.644	206.067	195.269
ENSG00000134817	APLNR	-1.85185	3.9529e-05	0.266216	0.677477	2.11807	2.93219e-06	174.603	12.5421	167.74
ENSG00000157538	DSCR3	-0.291441	3.97458e-05	-0.272371	0.000199414	0.0190708	0.80578	890.31	732.198	756.93
ENSG00000114378	HYAL1	0.674398	3.98733e-05	0.631803	0.00019117	-0.0425946	0.816258	568.318	813.597	804.565
ENSG00000138821	SLC39A8	0.640921	3.98733e-05	0.346996	0.0467299	-0.293926	0.0178341	1673.32	3268.55	2699.29
ENSG00000141756	FKBP10	0.568598	3.98876e-05	0.440811	0.00255691	-0.127787	0.308422	8572.54	12357.9	10577.8
ENSG00000275700	AATF	-0.958931	3.98876e-05	-1.1142	2.19907e-06	-0.15527	0.508051	649.545	311.588	277.498
ENSG00000110852	CLEC2B	-1.57762	4.01234e-05	0.552389	0.231277	2.13001	3.8767e-11	72.8014	13.944	81.2045
ENSG00000187866	FAM122A	0.334251	4.01557e-05	0.33676	5.00052e-05	0.00250861	0.979558	339.593	459.062	467.763
ENSG00000178202	KDELC2	0.572688	4.04663e-05	0.409322	0.00599424	-0.163366	0.174668	2414.75	4090.22	3660.52
ENSG00000119917	IFIT3	-0.758829	4.05152e-05	-0.426207	0.037748	0.332622	0.0268379	639.271	357.922	456.65
ENSG00000198019	FCGR1B	-1.76985	4.09417e-05	0.0863752	0.901409	1.85623	2.49788e-06	13.8058	1.81885	9.3744
ENSG00000007866	TEAD3	-0.792599	4.12779e-05	-0.719002	0.000326308	0.073597	0.727983	381.859	164.555	167.073
ENSG00000090659	CD209	-1.55703	4.12779e-05	-0.00569249	0.993602	1.55134	1.16059e-06	122.082	16.1062	66.5383
ENSG00000109339	MAPK10	0.591278	4.12779e-05	0.479148	0.00154175	-0.11213	0.402556	367.774	549.379	494.329
ENSG00000105352	CEACAM4	-1.80227	4.13295e-05	-1.15885	0.01203	0.643422	0.266032	6.31852	0.253424	0.506202
ENSG00000178498	DTX3	0.477955	4.13295e-05	0.183397	0.188635	-0.294557	0.000707245	567.068	756.663	614.258
ENSG00000274131	CEACAM4	-1.80227	4.13295e-05	-1.15885	0.01203	0.643422	0.266032	6.31852	0.253424	0.506202
ENSG00000125652	ALKBH7	-0.621099	4.16471e-05	-0.808133	9.59608e-08	-0.187035	0.15226	795.079	499.821	418.562
ENSG00000128342	LIF	-1.63249	4.17075e-05	-0.958226	0.0273475	0.674269	0.0885008	103.309	16.1926	25.7357
ENSG00000144381	HSPD1	-0.48273	4.17203e-05	-0.583833	8.27207e-07	-0.101103	0.348699	3833.97	2848.64	2793.4
ENSG00000148154	UGCG	-0.771913	4.18432e-05	-0.672598	0.000595622	0.0993151	0.607334	827.463	632.876	664.228
ENSG00000141338	ABCA8	0.958633	4.18763e-05	0.958611	6.2365e-05	-2.22515e-05	0.999883	188.788	395.284	379.248
ENSG00000176974	SHMT1	-0.600178	4.18763e-05	-0.829709	1.23727e-08	-0.229531	0.0570721	600.218	381.796	320.23
ENSG00000109519	GRPEL1	-0.674494	4.21169e-05	-0.738174	1.00099e-05	-0.0636797	0.720014	954.228	549.399	551.405
ENSG00000005059	CCDC109B	-0.738476	4.21249e-05	-0.279835	0.195407	0.45864	0.000909411	351.787	225.219	313.84
ENSG00000158869	FCER1G	-1.60112	4.21249e-05	0.340645	0.515553	1.94177	3.51181e-09	355.202	67.8603	322.881
ENSG00000196235	SUPT5H	-0.420432	4.21249e-05	-0.56364	3.57344e-08	-0.143207	0.092895	2865.34	1904.04	1679.27
ENSG00000169564	PCBP1	-0.419745	4.21796e-05	-0.560631	4.08637e-08	-0.140886	0.0985688	5438.58	4207.13	3849.66
ENSG00000173068	BNC2	-1.0661	4.21796e-05	-0.422134	0.171879	0.643965	0.00204317	392.233	150.422	235.943
ENSG00000149115	TNKS1BP1	-0.512577	4.22326e-05	-0.423185	0.00124402	0.0893911	0.451786	2554.75	1495.47	1632.07
ENSG00000256683	ZNF350	-0.696321	4.23819e-05	-0.654001	0.000194748	0.0423199	0.827248	281.62	174.521	188.909
ENSG00000119608	PROX2	1.73273	4.26298e-05	0.657132	0.194209	-1.0756	0.00497901	0.877311	6.38648	2.75344
ENSG00000065150	IPO5	-0.501335	4.30059e-05	-0.590917	1.72353e-06	-0.0895825	0.439297	3071.08	2335.05	2214.56
ENSG00000159588	CCDC17	-1.00268	4.30059e-05	-1.6657	5.24851e-12	-0.663011	0.000729563	134.79	54.4376	34.608
ENSG00000135604	STX11	-1.06638	4.34565e-05	-0.53577	0.0685023	0.530608	0.0142317	152.791	53.6708	72.6973
ENSG00000111276	CDKN1B	-0.524822	4.36403e-05	-0.535398	4.56237e-05	-0.0105768	0.948199	1181.39	903.267	876.693
ENSG00000204262	COL5A2	1.14059	4.36403e-05	1.22418	1.54612e-05	0.0835874	0.797436	18380.1	39772.8	34847.7
ENSG00000104064	GABPB1	-0.44218	4.39394e-05	-0.55772	2.70709e-07	-0.115541	0.222821	1094.37	878.385	797.034
ENSG00000163545	NUAK2	-1.76334	4.4132e-05	-0.841097	0.0805686	0.922243	0.0396805	8.96136	0.999236	2.81109
ENSG00000168569	TMEM223	0.542442	4.43461e-05	0.488009	0.000387677	-0.0544332	0.686689	143.74	218.611	207.665
ENSG00000124713	GNMT	-1.57633	4.44023e-05	-1.7723	5.30356e-06	-0.195974	0.688395	37.5398	7.03511	4.83286
ENSG00000143442	POGZ	0.569431	4.49889e-05	0.299327	0.0567279	-0.270105	0.0138292	1092.71	1495.4	1271.67
ENSG00000121766	ZCCHC17	0.522199	4.55182e-05	0.232738	0.118047	-0.289461	0.00301671	812.386	1305.18	1030.33
ENSG00000163520	FBLN2	-1.39817	4.55653e-05	0.171516	0.736869	1.56969	9.8128e-09	424.508	71.3345	294.604
ENSG00000147454	SLC25A37	-1.03784	4.56336e-05	-1.42482	1.71898e-08	-0.386973	0.0791691	10880.2	3729.93	2912.98
ENSG00000120949	TNFRSF8	1.48912	4.57403e-05	1.03598	0.00793223	-0.453139	0.188016	6.9576	32.1572	18.606
ENSG00000135940	COX5B	-0.441654	4.58435e-05	-0.432868	0.00010103	0.0087861	0.948888	1843.71	1247.24	1280.44
ENSG00000108788	MLX	-0.380477	4.61324e-05	-0.265728	0.00789031	0.114749	0.146943	664.969	503.212	523.277
ENSG00000134602	STK26	1.04436	4.61329e-05	0.695045	0.0119321	-0.349315	0.123066	2709.52	6169.54	4952.1
ENSG00000007080	CCDC124	-0.408441	4.63946e-05	-0.37541	0.000295033	0.0330307	0.761002	807.446	539.278	538.035
ENSG00000101098	RIMS4	-1.83345	4.64741e-05	-0.465935	0.415828	1.36751	0.00319182	13.6667	1.19248	7.78937
ENSG00000123992	DNPEP	-0.469464	4.64741e-05	-0.492949	2.777e-05	-0.0234848	0.861662	604.471	411.452	409.314
ENSG00000137265	IRF4	-1.54015	4.65393e-05	-0.978759	0.0162659	0.561391	0.13468	62.4934	12.396	21.0733
ENSG00000160209	PDXK	-0.511544	4.70078e-05	-0.490788	0.000151419	0.0207556	0.890139	1127.85	755.194	699.62
ENSG00000104825	NFKBIB	-0.441861	4.72535e-05	-0.556946	3.11295e-07	-0.115085	0.229729	458.868	273.536	252.212
ENSG00000170445	HARS	-0.300689	4.72535e-05	-0.255797	0.000911638	0.0448923	0.530435	953.962	767.527	783.933
ENSG00000175093	SPSB4	1.01357	4.72535e-05	1.27221	3.23789e-07	0.258637	0.251954	64.1843	129.436	156.13
ENSG00000213203	GIMAP1	-1.45976	4.77616e-05	0.270486	0.584588	1.73025	2.71376e-09	57.0902	13.3715	56.3467
ENSG00000112290	WASF1	-0.597209	4.77641e-05	-0.484828	0.00159413	0.112381	0.417779	89.3714	59.0547	62.9337
ENSG00000150681	RGS18	-1.83418	4.80296e-05	0.180887	0.789913	2.01507	5.71821e-06	11.765	1.02506	10.5396
ENSG00000124217	MOCS3	0.534082	4.84444e-05	0.385994	0.00601602	-0.148088	0.169639	78.2013	115.896	102.138
ENSG00000115350	POLE4	-0.551995	4.8466e-05	-0.527276	0.000167753	0.0247197	0.878917	318.755	229.363	223.306
ENSG00000139112	GABARAPL1	-0.623279	4.88628e-05	-0.500047	0.00193504	0.123232	0.390699	2018.4	1288.65	1457.63
ENSG00000053372	MRTO4	-0.421468	4.9355e-05	-0.29235	0.00867592	0.129117	0.140371	474.945	381.316	399.224
ENSG00000108424	KPNB1	-0.44891	4.99691e-05	-0.338404	0.00393411	0.110505	0.259242	2439.11	1892.48	2037.38
ENSG00000196730	DAPK1	-1.22906	5.01384e-05	-0.143844	0.75201	1.08521	5.56538e-06	156.087	52.8471	126.061
ENSG00000127463	EMC1	0.451538	5.03585e-05	0.234008	0.0626955	-0.21753	0.0122007	1249.49	1634.92	1427.22
ENSG00000163751	CPA3	-1.76289	5.11479e-05	0.0979353	0.888341	1.86083	0.000109181	66.8653	1.15634	46.1985
ENSG00000206315	PBX2	1.66418	5.12257e-05	0.893497	0.0504309	-0.770679	0.052909	6.87193	32.3862	28.0314
ENSG00000165233	C9orf89	-0.548768	5.13519e-05	-0.654649	1.58672e-06	-0.105881	0.404985	711.949	424.731	394.082
ENSG00000167005	NUDT21	-0.412828	5.14355e-05	-0.525735	2.5791e-07	-0.112906	0.200982	2593.49	2040.61	1924.63
ENSG00000108039	XPNPEP1	0.440703	5.18579e-05	0.25965	0.0306606	-0.181053	0.0363885	596.419	796.86	688.373
ENSG00000187210	GCNT1	0.903192	5.18579e-05	0.79415	0.000609523	-0.109043	0.643443	366.8	681.514	605.3
ENSG00000182208	MOB2	-0.456734	5.18613e-05	-0.423139	0.000287976	0.0335944	0.784964	371.273	256.649	249.982
ENSG00000171314	PGAM1	0.468604	5.21805e-05	0.369113	0.00250743	-0.0994912	0.346587	5262.38	8193.59	7534.19
ENSG00000180730	SHISA2	1.07438	5.21805e-05	1.0094	0.000223082	-0.0649796	0.836381	175.832	508.169	417.881
ENSG00000198464	ZNF480	-0.602255	5.21872e-05	-0.519003	0.000819848	0.0832517	0.576698	391.05	279.96	274.778
ENSG00000213719	CLIC1	-0.591983	5.21872e-05	-0.358307	0.0254824	0.233677	0.0504049	671.726	439.846	507.528
ENSG00000223639	CLIC1	-0.591983	5.21872e-05	-0.358307	0.0254824	0.233677	0.0504049	671.726	439.846	507.528
ENSG00000226248	CLIC1	-0.591983	5.21872e-05	-0.358307	0.0254824	0.233677	0.0504049	671.726	439.846	507.528
ENSG00000226417	CLIC1	-0.591983	5.21872e-05	-0.358307	0.0254824	0.233677	0.0504049	671.726	439.846	507.528
ENSG00000226651	CLIC1	-0.591983	5.21872e-05	-0.358307	0.0254824	0.233677	0.0504049	671.726	439.846	507.528
ENSG00000157426	AASDH	0.462674	5.22211e-05	0.230109	0.0770546	-0.232565	0.00709865	216.771	325.714	290.855
ENSG00000246705	H2AFJ	-0.575969	5.23522e-05	-0.952262	8.79823e-12	-0.376293	0.000449679	2266.13	1321.61	1069.63
ENSG00000137767	SQRDL	-1.04718	5.24099e-05	-0.0516472	0.903924	0.99553	3.43662e-07	355.427	149.626	309.911
ENSG00000176723	ZNF843	0.751336	5.24099e-05	0.503894	0.0119485	-0.247441	0.108887	78.1296	124.868	106.496
ENSG00000116218	NPHS2	1.77659	5.25145e-05	1.42116	0.00178773	-0.355434	0.499816	0.532691	11.1095	6.82601
ENSG00000183722	LHFP	0.718901	5.25618e-05	0.986119	2.35896e-08	0.267218	0.0702493	1182.08	1982.49	2206.97
ENSG00000102879	CORO1A	-1.43322	5.28041e-05	0.0889707	0.877732	1.52219	1.21815e-07	142.739	30.6392	87.8295
ENSG00000128052	KDR	-1.76313	5.28041e-05	0.248432	0.692222	2.01157	5.11321e-07	194.444	29.1724	220.68
ENSG00000206394	CLIC1	-0.591686	5.28041e-05	-0.358521	0.025456	0.233165	0.0510481	671.726	439.846	507.409
ENSG00000148468	FAM171A1	0.94384	5.28315e-05	1.06224	6.81092e-06	0.118397	0.624758	107.139	207.894	191.299
ENSG00000260314	MRC1	-1.66361	5.28315e-05	0.381397	0.48111	2.045	9.8128e-09	529.058	78.3971	480.657
ENSG00000121552	CSTA	-1.73453	5.41404e-05	-0.197169	0.757181	1.53736	0.000125584	25.2933	3.52437	12.7416
ENSG00000155659	VSIG4	-1.68161	5.43084e-05	0.236649	0.694393	1.91826	1.58735e-07	1049.21	136.633	802.453
ENSG00000158716	DUSP23	-0.65374	5.43219e-05	-0.545542	0.00128869	0.108198	0.493705	303.399	163.081	174.722
ENSG00000163584	RPL22L1	-0.644444	5.43219e-05	-0.612279	0.000202203	0.0321651	0.864563	474.381	411.846	371.906
ENSG00000276231	PIK3R6	-1.82761	5.44514e-05	-0.280084	0.659233	1.54753	0.00092068	10.9769	0.758542	3.57073
ENSG00000105486	LIG1	-0.691392	5.58918e-05	-0.852074	7.69149e-07	-0.160682	0.30871	294.167	170.47	144.478
ENSG00000167645	YIF1B	0.656594	5.58918e-05	0.583366	0.000562592	-0.073228	0.664547	470.922	699.382	619.576
ENSG00000185728	YTHDF3	0.412172	5.60621e-05	0.533526	1.76459e-07	0.121353	0.159902	680.555	959.056	1050.26
ENSG00000196937	FAM3C	0.487574	5.69973e-05	0.422824	0.000802411	-0.0647498	0.59069	1402.83	2459.83	2361.69
ENSG00000137727	ARHGAP20	-1.03484	5.71042e-05	-0.261994	0.432059	0.772846	0.000119905	75.3771	32.1014	62.4282
ENSG00000155850	SLC26A2	0.990991	5.72343e-05	0.936121	0.000224539	-0.0548702	0.852559	1093.11	2963.06	2616.47
ENSG00000173113	TRMT112	-0.395053	5.77033e-05	-0.508773	2.21536e-07	-0.11372	0.176612	1952.65	1459.87	1358.25
ENSG00000163975	MFI2	0.722098	5.78531e-05	0.275035	0.202055	-0.447063	0.00114626	10152.3	14435	10936.3
ENSG00000154898	CCDC144CP	1.22411	5.78707e-05	0.837972	0.0102654	-0.386138	0.164601	38.4299	99.0415	72.9865
ENSG00000173269	MMRN2	-0.844333	5.80498e-05	-0.486495	0.0362098	0.357837	0.0396868	345.765	176.294	239.104
ENSG00000248144	ADH1C	-1.69802	5.81697e-05	-0.750475	0.118453	0.947547	0.0255024	19.0541	2.44708	3.94508
ENSG00000184908	CLCNKB	1.51494	5.88935e-05	1.19528	0.00247045	-0.319662	0.424592	12.0376	71.1066	45.7183
ENSG00000175066	GK5	0.70215	5.89647e-05	0.569984	0.00188546	-0.132166	0.421928	216.573	330.468	313.683
ENSG00000108691	CCL2	-1.30942	5.9015e-05	-0.100601	0.846116	1.20882	3.24129e-06	385.85	129.641	318.734
ENSG00000182600	C2orf82	1.04133	5.9109e-05	0.543988	0.0624521	-0.497345	0.0210921	4594.54	9100.94	5641.08
ENSG00000132170	PPARG	-1.48385	5.94598e-05	-0.0783097	0.895858	1.40554	5.62265e-06	47.5847	11.0907	32.9803
ENSG00000132155	RAF1	-0.329611	6.04552e-05	-0.450602	3.53752e-08	-0.120991	0.0712106	2134.16	1725.04	1568.86
ENSG00000128604	IRF5	-1.16766	6.08179e-05	-0.0338041	0.946654	1.13386	4.81739e-07	77.7441	24.1545	57.2267
ENSG00000171425	ZNF581	-0.540578	6.09184e-05	-0.664876	9.71737e-07	-0.124298	0.312538	233.308	154.91	140.141
ENSG00000166402	TUB	0.624469	6.10495e-05	0.423052	0.0117393	-0.201416	0.125437	503.567	762.458	656.536
ENSG00000204682	CASC10	0.845524	6.12848e-05	0.536942	0.019383	-0.308582	0.0735068	55.1643	106.713	82.7625
ENSG00000232388	LINC00493	-0.567764	6.13653e-05	-0.708096	6.32445e-07	-0.140332	0.268333	700.869	538.418	477.977
ENSG00000107679	PLEKHA1	0.70147	6.14415e-05	0.739301	3.38552e-05	0.0378312	0.852468	997.45	1890.32	1936.89
ENSG00000088882	CPXM1	-1.73731	6.2846e-05	-0.360424	0.535756	1.37688	0.000912106	379.839	40.314	128.384
ENSG00000158813	EDA	-0.914303	6.29887e-05	-0.263263	0.361534	0.65104	0.000224188	72.5395	34.8308	57.3907
ENSG00000146021	KLHL3	0.702816	6.31342e-05	0.356015	0.0741389	-0.346801	0.0120272	222.601	345.686	265.487
ENSG00000184786	TCTE3	-0.870251	6.38973e-05	-1.14948	1.44081e-07	-0.27923	0.175946	26.1943	11.0101	10.362
ENSG00000275368	TCTE3	-0.870251	6.38973e-05	-1.14948	1.44081e-07	-0.27923	0.175946	26.1943	11.0101	10.362
ENSG00000101150	TPD52L2	-0.244456	6.41196e-05	-0.278164	6.8256e-06	-0.0337077	0.575707	3009.29	2547.65	2444.95
ENSG00000130598	TNNI2	1.57691	6.42455e-05	1.66194	3.01538e-05	0.0850379	0.872316	4.53064	34.1207	36.2722
ENSG00000239257	RPL23AP1	-1.39656	6.42455e-05	-1.62638	3.92169e-06	-0.229818	0.569065	29.5447	8.36587	8.50066
ENSG00000239784	RPL23AP1	-1.39656	6.42455e-05	-1.62638	3.92169e-06	-0.229818	0.569065	29.5447	8.36587	8.50066
ENSG00000240845	RPL23AP1	-1.39656	6.42455e-05	-1.62638	3.92169e-06	-0.229818	0.569065	29.5447	8.36587	8.50066
ENSG00000241880	RPL23AP1	-1.39656	6.42455e-05	-1.62638	3.92169e-06	-0.229818	0.569065	29.5447	8.36587	8.50066
ENSG00000242039	RPL23AP1	-1.39656	6.42455e-05	-1.62638	3.92169e-06	-0.229818	0.569065	29.5447	8.36587	8.50066
ENSG00000118263	KLF7	-0.929447	6.42705e-05	-0.344936	0.218575	0.58451	0.00134558	493.491	224.981	344.785
ENSG00000076864	RAP1GAP	0.961991	6.43029e-05	0.640557	0.0137545	-0.321434	0.11322	34.2479	72.1737	56.6661
ENSG00000198055	GRK6	-0.496555	6.43029e-05	-0.42297	0.00111044	0.0735848	0.547958	314.176	209.153	208.681
ENSG00000146587	RBAK	0.46634	6.47944e-05	0.455549	0.000141615	-0.0107914	0.939873	240.911	365.136	362.75
ENSG00000214756	METTL12	-0.930847	6.50716e-05	-0.85216	0.000413775	0.0786872	0.767121	91.3908	44.7678	52.2498
ENSG00000124126	PREX1	0.548384	6.50959e-05	0.344115	0.0216398	-0.204269	0.0701844	2284.19	3146.65	2770.27
ENSG00000106258	CYP3A5	-1.03582	6.52555e-05	-1.10902	2.58836e-05	-0.0732063	0.808097	691.988	193.937	197.056
ENSG00000254087	LYN	-0.587429	6.55743e-05	-0.133126	0.497047	0.454303	2.59248e-05	386.853	249.997	339.307
ENSG00000123124	WWP1	-0.433637	6.62544e-05	-0.0669651	0.669232	0.366672	2.74691e-06	812.546	647.484	794.666
ENSG00000182774	RPS17	-0.833482	6.62544e-05	-1.10403	1.13828e-07	-0.270548	0.135164	3548.5	2444.99	1923.16
ENSG00000137804	NUSAP1	-1.25306	6.68012e-05	-0.394995	0.310042	0.858069	0.00092068	106.282	35.099	58.0776
ENSG00000158480	SPATA2	0.494323	6.73819e-05	0.177627	0.23969	-0.316696	0.000507759	217.123	288.329	225.826
ENSG00000163738	MTHFD2L	-0.792346	6.83279e-05	-0.89012	9.89419e-06	-0.0977746	0.640977	137.892	83.702	81.2415
ENSG00000107562	CXCL12	-1.67343	6.85883e-05	0.605225	0.230078	2.27865	6.68246e-10	627.333	102.933	885.574
ENSG00000281883	RP11-65B7.2	1.05943	6.89949e-05	0.599164	0.0434911	-0.460268	0.0315761	19.6857	52.5189	38.278
ENSG00000084636	COL16A1	0.800585	6.90933e-05	0.559378	0.00947479	-0.241207	0.171291	7559.07	12700.5	9657.22
ENSG00000104964	AES	-0.468253	6.90933e-05	-0.666003	1.12169e-08	-0.19775	0.0360698	5127.56	3452	3036.19
ENSG00000105618	PRPF31	-0.321136	6.90933e-05	-0.425522	1.22484e-07	-0.104386	0.12173	466.751	334.485	335.45
ENSG00000169403	PTAFR	-1.43555	6.90933e-05	0.542562	0.20648	1.97811	1.59679e-11	122.686	21.1452	96.9813
ENSG00000203705	TATDN3	-0.564679	6.91372e-05	-0.59799	3.52809e-05	-0.0333112	0.836393	265.745	192.008	184.706
ENSG00000171016	PYGO1	0.568344	7.00145e-05	0.600797	3.50343e-05	0.0324527	0.837454	158.171	259.865	268.502
ENSG00000204852	TCTN1	0.554763	7.00145e-05	0.405258	0.00637165	-0.149505	0.2204	1134.27	1608.11	1385.92
ENSG00000068912	ERLEC1	0.435709	7.0015e-05	0.330771	0.00440588	-0.104937	0.281633	2555.45	4164.31	3760.06
ENSG00000070087	PFN2	-0.393932	7.03671e-05	-0.417659	3.49359e-05	-0.0237278	0.830244	1490.95	1285.62	1294.26
ENSG00000250247	SEPHS2P1	1.73845	7.03671e-05	1.2553	0.00635734	-0.48315	0.304083	0.114625	4.06052	2.1747
ENSG00000213015	ZNF580	-0.619711	7.06521e-05	-1.12633	1.2953e-13	-0.506618	1.03215e-05	694.502	338.558	255.26
ENSG00000188313	PLSCR1	-0.691356	7.10016e-05	-0.556522	0.00234638	0.134834	0.412556	902.421	582.76	628.733
ENSG00000166946	CCNDBP1	-0.505787	7.11201e-05	-0.636803	5.96979e-07	-0.131015	0.244107	1098.06	811.088	742.668
ENSG00000166595	FAM96B	-0.425164	7.12134e-05	-0.505705	2.74939e-06	-0.0805401	0.421326	657.644	499.358	461.937
ENSG00000179604	CDC42EP4	-0.723647	7.12134e-05	-1.10119	8.30293e-10	-0.377546	0.00868809	1663.01	962.228	739.862
ENSG00000214113	LYRM4	-0.412515	7.1418e-05	-0.430307	5.01716e-05	-0.0177925	0.885535	512.645	397.266	391.281
ENSG00000115602	IL1RL1	-1.38987	7.15027e-05	-0.797896	0.0370478	0.591971	0.0774242	11.5087	4.38045	7.39915
ENSG00000228510	RP11-339B21.8	0.980048	7.16548e-05	0.400384	0.171148	-0.579664	0.00278623	69.7865	116.73	79.6386
ENSG00000170142	UBE2E1	-0.390891	7.38509e-05	-0.28007	0.0078365	0.110821	0.189752	1148.12	1097.93	1175.49
ENSG00000004776	HSPB6	0.949765	7.39271e-05	0.478949	0.0780287	-0.470816	0.0160512	945.558	1756.92	1236.2
ENSG00000132612	VPS4A	-0.352843	7.39271e-05	-0.423184	2.28925e-06	-0.0703418	0.391738	860.104	638.344	601.382
ENSG00000141198	TOM1L1	-0.903055	7.39271e-05	-0.567362	0.0221152	0.335693	0.0863143	156.678	81.2791	103.08
ENSG00000176435	CLEC14A	-1.79144	7.39649e-05	0.1909	0.777363	1.98234	1.33743e-05	184.735	13.7063	151.568
ENSG00000139998	RAB15	0.922787	7.40297e-05	1.07371	4.63161e-06	0.150919	0.507543	100.725	199.137	199.097
ENSG00000123179	EBPL	-0.680275	7.40739e-05	-0.826284	1.65701e-06	-0.146009	0.360751	508.841	363.876	326.022
ENSG00000118762	PKD2	0.506837	7.42059e-05	0.511918	9.29512e-05	0.00508135	0.974977	2374.53	3240.69	3323.76
ENSG00000027697	IFNGR1	-0.580878	7.44241e-05	-0.314044	0.0562318	0.266834	0.0222133	1278.27	1012.12	1196.44
ENSG00000128891	C15orf57	-0.527536	7.46386e-05	-0.519418	0.000149246	0.00811785	0.961784	421.793	346.207	313.915
ENSG00000163913	IFT122	-0.614562	7.46808e-05	-0.820627	1.11403e-07	-0.206065	0.116974	1109.68	602.65	536.304
ENSG00000198792	TMEM184B	0.475907	7.47906e-05	0.528185	1.44284e-05	0.0522775	0.672092	676.321	872.277	895.316
ENSG00000176022	B3GALT6	0.481422	7.51025e-05	0.448266	0.00035812	-0.0331568	0.799459	238.903	327.725	305.199
ENSG00000095539	SEMA4G	0.856046	7.54368e-05	0.485452	0.0440172	-0.370594	0.0286398	31.899	55.9732	46.1398
ENSG00000167670	CHAF1A	-0.837033	7.55184e-05	-0.661006	0.00295649	0.176027	0.382123	120.814	61.7698	79.6668
ENSG00000107263	RAPGEF1	-0.690445	7.65425e-05	-0.17302	0.449979	0.517425	7.0781e-05	630.896	345.565	497.543
ENSG00000175283	DOLK	0.492162	7.65425e-05	0.661232	8.84926e-08	0.16907	0.0916344	159.498	218.833	237.094
ENSG00000203883	SOX18	-1.75155	7.66183e-05	0.473991	0.397815	2.22554	5.37268e-08	48.2147	6.10364	55.682
ENSG00000129355	CDKN2D	-0.618137	7.68501e-05	-0.76473	1.09206e-06	-0.146594	0.301749	502.376	296.331	263.892
ENSG00000101695	RNF125	-1.09195	7.69064e-05	-0.17131	0.663479	0.920637	1.89196e-05	67.3624	26.9366	55.7925
ENSG00000005513	SOX8	0.943433	7.7216e-05	0.464946	0.0876103	-0.478487	0.0135672	867.706	1595.53	1171.26
ENSG00000007312	CD79B	-1.06583	7.73862e-05	-1.18498	1.40858e-05	-0.119158	0.688911	1150	365.28	339.777
ENSG00000266472	MRPS21	-0.350359	7.73862e-05	-0.433779	1.08241e-06	-0.0834201	0.289908	1392.04	1226.39	1134.77
ENSG00000099977	DDT	-0.520225	7.74209e-05	-0.811383	4.06897e-10	-0.291158	0.00429179	337.823	230.159	185.478
ENSG00000168546	GFRA2	1.33061	7.75392e-05	1.45623	1.89183e-05	0.125621	0.755334	120.6	374.437	499.732
ENSG00000187513	GJA4	-1.77822	7.76458e-05	0.161928	0.81279	1.94015	9.6152e-06	71.0934	6.40028	54.9433
ENSG00000137474	MYO7A	-1.17425	7.76721e-05	-0.939877	0.00257468	0.234372	0.438505	189.361	62.3851	89.6732
ENSG00000172037	LAMB2	0.635871	7.77025e-05	0.400283	0.0226545	-0.235589	0.0779022	12219.7	16430.6	13543.5
ENSG00000197905	TEAD4	-0.845582	7.77025e-05	-0.724483	0.00116352	0.121098	0.58089	267.667	119.702	131.236
ENSG00000103253	HAGHL	1.19546	7.82966e-05	1.03827	0.000967254	-0.157195	0.627168	29.6717	78.6006	59.1535
ENSG00000196549	MME	-1.54018	7.85971e-05	-0.0452564	0.946654	1.49492	7.2284e-06	284.534	36.7967	117.46
ENSG00000256667	KLRAP1	0.862227	7.88817e-05	0.667096	0.00381183	-0.195132	0.329157	64.1049	112.97	90.5923
ENSG00000183578	TNFAIP8L3	-0.718236	7.92577e-05	-0.414899	0.0395432	0.303336	0.0413359	321.125	228.951	263.35
ENSG00000186510	CLCNKA	1.54577	7.96432e-05	0.702662	0.120003	-0.84311	0.0189838	15.5988	80.0103	31.7191
ENSG00000178567	EPM2AIP1	0.510409	7.97114e-05	0.115885	0.502882	-0.394524	2.87772e-05	1018.33	1391.19	1118.99
ENSG00000226887	ERVMER34-1	-0.667194	7.98646e-05	-0.890987	1.52684e-07	-0.223793	0.127632	114.007	79.5132	67.0683
ENSG00000144455	SUMF1	0.558891	7.99753e-05	0.421034	0.00513781	-0.137857	0.274867	971.642	1383	1274.38
ENSG00000090487	SPG21	-0.371887	8.02782e-05	-0.310354	0.00166604	0.0615323	0.493705	1063.07	921.312	946.329
ENSG00000150076	CCDC7	0.821438	8.10405e-05	0.485913	0.0342723	-0.335525	0.0373176	26.1917	48.036	39.6682
ENSG00000197024	ZNF398	0.444621	8.11201e-05	0.417465	0.000335179	-0.0271565	0.82398	183.378	258.905	245.265
ENSG00000124615	MOCS1	-0.388789	8.15764e-05	-0.261905	0.013805	0.126884	0.123708	309.041	222.975	242.479
ENSG00000151135	TMEM263	0.363071	8.20379e-05	0.280959	0.00396729	-0.0821122	0.319961	1366.25	2030.98	1852.72
ENSG00000162366	PDZK1IP1	-1.36025	8.20379e-05	-1.35243	0.000129517	0.00782794	0.987065	48.7441	15.2527	14.4578
ENSG00000142784	WDTC1	-0.335578	8.28963e-05	-0.325877	0.000204059	0.00970177	0.926358	923.281	679.218	682.54
ENSG00000165025	SYK	-1.33748	8.29804e-05	0.519126	0.198607	1.85661	1.03889e-11	122.621	29.8114	126.698
ENSG00000129226	CD68	-0.855964	8.30747e-05	-0.251942	0.361994	0.604023	0.000286826	4749.16	2214.1	3477.16
ENSG00000169230	PRELID1	-0.409633	8.39389e-05	-0.427217	5.78216e-05	-0.0175843	0.886887	1349.85	965.062	950.983
ENSG00000137168	PPIL1	0.518333	8.47864e-05	0.505662	0.00019117	-0.0126703	0.937971	356.08	566.14	546.391
ENSG00000138685	FGF2	0.536034	8.53945e-05	0.292749	0.0556638	-0.243286	0.0249552	2453.37	4777.27	4095.27
ENSG00000031003	FAM13B	0.420426	8.59224e-05	0.416057	0.00015182	-0.00436916	0.974135	679.321	964.104	987.855
ENSG00000162032	SPSB3	-0.457778	8.66076e-05	-0.703953	8.83136e-10	-0.246176	0.00640705	808.27	497.985	419.458
ENSG00000198912	C1orf174	0.350876	8.66076e-05	0.310904	0.00081103	-0.0399714	0.646766	174.263	229.147	204.851
ENSG00000214688	C10orf105	1.09581	8.66076e-05	1.56028	1.56654e-08	0.464472	0.0533411	844.597	1886.78	2910.99
ENSG00000119986	AVPI1	-0.726726	8.66165e-05	-0.654478	0.000649743	0.0722483	0.718373	479.731	260.53	280.644
ENSG00000135446	CDK4	-0.41951	8.67205e-05	-0.26257	0.0246609	0.156939	0.072321	1274.77	974.97	1026.11
ENSG00000166401	SERPINB8	-0.8377	8.71206e-05	-0.0867435	0.790358	0.750957	2.0486e-06	239.224	124.197	207.178
ENSG00000211455	STK38L	0.770641	8.73015e-05	0.562568	0.00719378	-0.208072	0.236859	2222.68	3723.12	3448.46
ENSG00000122861	PLAU	-1.45779	8.74629e-05	0.0553905	0.930881	1.51318	8.16556e-07	576.763	77.0907	277.59
ENSG00000010932	FMO1	-1.65239	8.76371e-05	-0.574078	0.258479	1.07831	0.00757871	46.1274	6.97914	16.6243
ENSG00000197019	SERTAD1	-0.814112	8.80238e-05	-0.859846	4.8125e-05	-0.0457343	0.851708	465.223	280.895	255.639
ENSG00000106080	FKBP14	0.711111	8.82367e-05	0.838496	4.39314e-06	0.127386	0.463988	819.588	1553.14	1582.87
ENSG00000187372	PCDHB13	0.616883	8.82367e-05	0.499963	0.002474	-0.11692	0.414265	94.8961	160.215	150.333
ENSG00000164187	LMBRD2	0.827814	8.83002e-05	0.810176	0.000185912	-0.0176383	0.948199	339.571	538.969	634.741
ENSG00000091592	NLRP1	0.901786	8.88848e-05	0.56915	0.0233482	-0.332637	0.0912817	1259.05	2803.86	2044.89
ENSG00000101670	LIPG	-1.59597	8.88848e-05	-0.977274	0.0267918	0.618698	0.140436	52.4042	6.19223	11.8947
ENSG00000160408	ST6GALNAC6	-0.370943	8.88848e-05	-0.425781	8.4916e-06	-0.0548382	0.553846	3512.3	2470.31	2410.11
ENSG00000205937	RNPS1	-0.30502	8.9077e-05	-0.314809	7.56976e-05	-0.00978887	0.91846	1464.95	1119.48	1127.01
ENSG00000235985	AIF1	-1.56723	8.9077e-05	0.252446	0.655027	1.81968	8.80831e-08	52.3329	7.73886	40.5921
ENSG00000146457	WTAP	-0.478835	8.92659e-05	-0.522088	2.61511e-05	-0.0432527	0.741967	2142.43	1701.65	1652.23
ENSG00000231631	PSMB8	-0.89692	8.92659e-05	-0.672262	0.00568741	0.224657	0.293373	127.332	65.927	73.2331
ENSG00000111321	LTBR	-0.420332	8.94086e-05	-0.304076	0.00794326	0.116256	0.211879	1550.75	969.834	1095
ENSG00000180423	HARBI1	0.748499	8.97313e-05	0.72377	0.000245929	-0.0247295	0.91033	23.7182	40.8866	38.4075
ENSG00000125868	DSTN	0.456003	9.00106e-05	0.554909	2.1156e-06	0.0989061	0.351634	5812.1	8816.99	9579.57
ENSG00000188517	COL25A1	1.14149	9.00106e-05	1.20068	5.03206e-05	0.0591989	0.867983	33.2197	112.85	118.344
ENSG00000167447	SMG8	0.501178	9.03912e-05	0.39005	0.00395827	-0.111128	0.329157	216.537	329.645	306.281
ENSG00000180772	AGTR2	1.69708	9.1947e-05	1.74606	6.53491e-05	0.0489808	0.9416	1.34586	21.578	17.4034
ENSG00000140577	CRTC3	-0.57261	9.27205e-05	-0.606801	4.8125e-05	-0.0341913	0.837127	1086.4	658.14	635.629
ENSG00000149150	SLC43A1	-0.571958	9.27205e-05	-0.695368	2.28679e-06	-0.12341	0.363371	283.292	180.858	157.695
ENSG00000135324	MRAP2	1.07077	9.31897e-05	0.661471	0.0272436	-0.409298	0.0869515	395.565	954.614	704.253
ENSG00000150457	LATS2	-0.436779	9.33196e-05	-0.335294	0.00463452	0.101485	0.313341	836.187	625.066	667.144
ENSG00000182218	HHIPL1	0.696293	9.37121e-05	0.877304	8.74469e-07	0.181011	0.25467	595.53	950.114	1126.57
ENSG00000183287	CCBE1	-1.47154	9.37291e-05	-0.694938	0.106701	0.776603	0.0253346	110.655	29.4394	46.0085
ENSG00000168612	ZSWIM1	0.519065	9.39199e-05	0.505555	0.000219179	-0.0135096	0.931453	71.8279	94.0963	94.4339
ENSG00000141699	FAM134C	0.302857	9.4311e-05	0.135016	0.136303	-0.167841	0.00392393	593.927	732.729	639.314
ENSG00000102882	MAPK3	-0.363321	9.44519e-05	-0.576053	2.85993e-10	-0.212732	0.00254652	2054.05	1418.47	1299.86
ENSG00000081148	IMPG2	1.09034	9.45876e-05	0.829222	0.00494983	-0.261121	0.301696	15.4526	29.7636	28.4128
ENSG00000119812	FAM98A	0.63847	9.45876e-05	0.662776	7.21174e-05	0.0243062	0.902504	721.28	1236.85	1175.31
ENSG00000025293	PHF20	-0.474991	9.54289e-05	-0.382975	0.00279615	0.0920166	0.418507	907.375	716.503	769.526
ENSG00000131370	SH3BP5	-0.613559	9.54289e-05	-0.461394	0.00573533	0.152165	0.281985	2377	1396.77	1610.99
ENSG00000163069	SGCB	0.538042	9.62858e-05	0.802728	3.62959e-09	0.264686	0.0142403	1328.77	2000.46	2426.32
ENSG00000092929	UNC13D	-0.861449	9.68092e-05	-1.24917	1.12273e-08	-0.387722	0.0353623	259.659	108.043	84.9079
ENSG00000238208	RP11-112N13.1	0.729958	9.81087e-05	0.434543	0.0348223	-0.295415	0.0467301	54.3675	72.2454	62.4612
ENSG00000062582	MRPS24	-0.453558	9.81578e-05	-0.612624	1.26713e-07	-0.159066	0.100417	786.15	569.011	501.776
ENSG00000160179	ABCG1	-1.47005	9.81578e-05	-0.259512	0.621457	1.21054	0.000193311	58.2329	12.0073	42.3048
ENSG00000101336	HCK	-1.6212	9.88901e-05	0.283863	0.62478	1.90506	1.58735e-07	140.308	21.624	106.504
ENSG00000167157	PRRX2	-0.712148	9.89772e-05	-0.780061	2.65333e-05	-0.0679129	0.732228	773.935	391.365	389.357
ENSG00000126803	HSPA2	0.559586	9.91019e-05	0.502644	0.000753831	-0.056942	0.707329	1149.75	1598.46	1584.49
ENSG00000226025	LGALS17A	-1.76391	0.000100005	-1.22569	0.00956747	0.538222	0.365154	4.71816	0.226	0.743437
ENSG00000145912	NHP2	-0.363054	0.000100097	-0.412118	1.27652e-05	-0.0490641	0.596752	905.346	691.188	679.256
ENSG00000184304	PRKD1	0.696602	0.000100097	0.474213	0.0140246	-0.222389	0.146758	454.747	856.006	696.467
ENSG00000101916	TLR8	-1.58941	0.0001015	0.732354	0.11441	2.32177	3.88746e-11	25.5232	5.99569	39.6716
ENSG00000137760	ALKBH8	0.505823	0.000101875	0.644165	7.02401e-07	0.138342	0.208604	160.983	239.274	255.455
ENSG00000068078	FGFR3	1.02152	0.000102283	0.41202	0.187153	-0.609497	0.00394198	2122.71	4020.78	2735.66
ENSG00000136167	LCP1	-1.56691	0.000102462	0.38044	0.471486	1.94735	1.3626e-08	409.52	89.9861	401.983
ENSG00000143847	PPFIA4	0.791052	0.000102894	0.313314	0.198318	-0.477737	0.00249774	633.845	951.081	721.208
ENSG00000118965	WDR35	0.411986	0.00010296	0.349009	0.00163967	-0.0629766	0.537623	601.803	890.024	852.282
ENSG00000100664	EIF5	0.403061	0.000103084	0.350228	0.00120487	-0.052833	0.610521	3210.75	4541.27	4445.98
ENSG00000184292	TACSTD2	-1.35116	0.000103084	-0.782076	0.0414196	0.569079	0.077648	111.873	27.5635	45.3781
ENSG00000099998	GGT5	-1.48815	0.000103349	0.406972	0.407511	1.89512	2.31208e-09	220.332	45.1265	243.49
ENSG00000164402	SEPT8	0.337841	0.000103349	0.489448	1.27001e-08	0.151607	0.0262056	1074.14	1311.4	1463.26
ENSG00000205358	MT1H	-1.55359	0.000103349	-1.80716	6.45601e-06	-0.25357	0.594621	417.238	109.073	84.8329
ENSG00000108798	ABI3	-1.3977	0.000104024	-0.00206533	0.997361	1.39563	2.37474e-06	51.7598	11.2351	39.7416
ENSG00000163606	CD200R1	-1.60784	0.000104024	0.357844	0.510722	1.96568	4.25857e-08	26.7845	4.06951	23.8942
ENSG00000180817	PPA1	-0.506096	0.000105255	-0.433233	0.00147417	0.072863	0.573648	1509.32	1227.53	1298.39
ENSG00000132470	ITGB4	-1.14564	0.000105523	-1.29048	1.52421e-05	-0.144839	0.657082	766.562	236.023	249.846
ENSG00000198242	RPL23A	-0.670465	0.000106692	-0.925727	7.0943e-08	-0.255262	0.0756595	9739.77	7175.43	5541.75
ENSG00000087269	NOP14	-0.512124	0.000107801	-0.478306	0.000462418	0.0338184	0.818022	598.24	411.867	415.341
ENSG00000055732	MCOLN3	0.806204	0.000107894	0.619851	0.00487905	-0.186353	0.331394	230.008	366.047	355.481
ENSG00000182196	ARL6IP4	-0.387867	0.000108014	-0.505099	4.44752e-07	-0.117231	0.169726	2827.3	2029.56	1866.86
ENSG00000103569	AQP9	-1.75098	0.000108163	-0.941098	0.0572359	0.809881	0.133066	30.0965	2.65649	6.50191
ENSG00000122376	FAM35A	0.411691	0.000108291	0.63613	1.06328e-09	0.224439	0.00503876	386.905	534.441	619.308
ENSG00000002933	TMEM176A	1.52903	0.000108328	0.799814	0.071182	-0.729213	0.0536049	106.928	378.949	205.089
ENSG00000187257	RSBN1L	0.459705	0.000108784	0.295152	0.0225699	-0.164552	0.089009	327.055	459.656	417.423
ENSG00000137393	RNF144B	-1.04933	0.000108945	-1.03721	0.000191342	0.0121217	0.973923	860.443	364.44	362.469
ENSG00000180448	HMHA1	-1.29056	0.000109751	-0.117559	0.819958	1.173	1.33743e-05	89.8181	25.5288	65.2101
ENSG00000182870	GALNT9	-1.3064	0.000109751	-1.89633	1.43088e-08	-0.589932	0.0577951	98.933	29.6811	14.882
ENSG00000137496	IL18BP	-0.837222	0.000110033	-1.14957	8.97216e-08	-0.31235	0.0907442	549.436	242.316	186.23
ENSG00000109445	ZNF330	-0.33304	0.000110412	-0.395625	5.06916e-06	-0.0625849	0.43681	579.097	450.552	446.274
ENSG00000168995	SIGLEC7	-1.73923	0.00011181	-0.238144	0.712994	1.50108	0.000817883	15.7928	1.57994	6.84853
ENSG00000157110	RBPMS	-0.749502	0.000111919	-0.631296	0.00185063	0.118206	0.540866	534.774	282.851	304.171
ENSG00000126947	ARMCX1	-0.401921	0.000112377	-0.389135	0.000279351	0.0127858	0.920612	938.591	765.68	765.327
ENSG00000185800	DMWD	-0.403242	0.00011254	-0.464703	1.05389e-05	-0.0614603	0.546596	638.324	449.708	426.915
ENSG00000102144	PGK1	0.578094	0.000113341	0.296295	0.0812769	-0.281799	0.0172378	10662.2	19021.1	15955.4
ENSG00000113140	SPARC	1.16473	0.000114587	1.21411	7.83789e-05	0.0493845	0.899478	96155.1	252029	184296
ENSG00000163875	MEAF6	-0.346122	0.000114772	-0.363515	7.1227e-05	-0.0173927	0.867223	1028.23	835.44	829.289
ENSG00000173726	TOMM20	-0.513272	0.000115466	-0.795458	1.20153e-09	-0.282186	0.00596806	5615.31	4826.95	3999.97
ENSG00000138814	PPP3CA	0.478458	0.000116204	0.388766	0.00289777	-0.0896914	0.44198	3147.62	4796.07	4707.13
ENSG00000147905	ZCCHC7	-0.401749	0.000116204	-0.468255	8.26938e-06	-0.0665056	0.502916	593.458	490.534	476.947
ENSG00000160803	UBQLN4	-0.423918	0.000116417	-0.445414	7.1227e-05	-0.0214955	0.866432	747.359	516.234	534.799
ENSG00000171951	SCG2	-1.65736	0.000116433	0.502019	0.349397	2.15938	1.73727e-08	157.563	18.5998	233.013
ENSG00000102802	MEDAG	-1.02549	0.000117302	-0.725138	0.0109456	0.300352	0.219668	1959.76	742.726	969.854
ENSG00000133243	BTBD2	-0.344965	0.000118469	-0.38193	2.64209e-05	-0.0369648	0.690805	1218.15	823.058	797.279
ENSG00000278154	LAIR1	-1.72193	0.000118469	0.183819	0.78427	1.90574	7.51454e-06	46.4145	4.08177	32.0539
ENSG00000180104	EXOC3	-0.286206	0.000119062	-0.358097	1.57913e-06	-0.0718909	0.27402	761.543	581.117	544.354
ENSG00000117139	KDM5B	0.444767	0.000119281	0.38541	0.00138402	-0.0593576	0.604785	776.547	1124.51	1031.74
ENSG00000060971	ACAA1	-0.366129	0.000119772	-0.410684	2.02595e-05	-0.0445547	0.6463	802.275	565.381	531.997
ENSG00000090905	TNRC6A	0.532999	0.000119772	0.320026	0.0362286	-0.212972	0.0584944	1524.74	2060.38	1798.35
ENSG00000145681	HAPLN1	0.992734	0.000119772	0.728247	0.00805054	-0.264487	0.270842	31995	73575.6	56146.2
ENSG00000005700	IBTK	0.506094	0.000120304	0.404449	0.00354283	-0.101645	0.404228	1094.35	1764.19	1673.47
ENSG00000117632	STMN1	-1.34383	0.000120625	-0.111217	0.839792	1.23261	1.58998e-05	210.577	66.76	121.75
ENSG00000119922	IFIT2	-1.01701	0.000121733	-0.362233	0.260579	0.654778	0.0019538	173.563	81.7055	140.116
ENSG00000095787	WAC	-0.334754	0.000121905	-0.374721	2.1635e-05	-0.0399664	0.652767	3928.32	3085.98	3100.34
ENSG00000133800	LYVE1	-1.20323	0.000123121	0.0926193	0.852752	1.29585	9.53382e-08	923.325	289.595	851.774
ENSG00000144580	RQCD1	0.284729	0.000123649	0.218752	0.00540226	-0.0659765	0.310093	581.389	768.813	715.971
ENSG00000188559	RALGAPA2	-0.87333	0.000123649	-0.4797	0.0594214	0.393631	0.036805	231.002	119.739	166.853
ENSG00000127603	MACF1	0.376968	0.000123679	0.424713	1.91994e-05	0.047745	0.629834	3290.4	4271.28	4475.94
ENSG00000162065	TBC1D24	0.730662	0.000123679	0.537917	0.00798511	-0.192745	0.256142	235.299	363.978	322.649
ENSG00000151702	FLI1	-0.591635	0.000123796	-0.11795	0.580231	0.473686	2.74815e-05	649.705	404.31	557.923
ENSG00000111716	LDHB	-0.475424	0.000124373	-0.647551	1.47449e-07	-0.172127	0.0932401	3639.84	2826.87	2434.82
ENSG00000139263	LRIG3	0.454909	0.000124373	0.167994	0.242954	-0.286915	0.00124467	1635	2443.32	2073.74
ENSG00000141698	NT5C3B	-0.479245	0.000124457	-0.523153	3.68898e-05	-0.0439082	0.743209	823.642	586.893	580.746
ENSG00000168282	MGAT2	0.418106	0.000124552	0.602288	2.19915e-08	0.184182	0.030962	456.495	641.473	716.262
ENSG00000106852	LHX6	-1.73339	0.00012466	0.254059	0.691303	1.98744	2.11037e-05	16.7627	1.00994	16.8392
ENSG00000225589	MDC1	-0.921775	0.00012466	-1.07435	1.06545e-05	-0.152573	0.549962	30.7933	12.8355	14.526
ENSG00000234012	MDC1	-0.921775	0.00012466	-1.07435	1.06545e-05	-0.152573	0.549962	30.7933	12.8355	14.526
ENSG00000146938	NLGN4X	1.17858	0.000124688	0.915357	0.00474931	-0.263221	0.388877	128.922	344.343	295.153
ENSG00000147894	C9orf72	-0.854624	0.000124688	-0.993902	9.66058e-06	-0.139278	0.534201	337.999	192.467	177.791
ENSG00000130294	KIF1A	1.30574	0.00012477	1.24279	0.000377197	-0.0629553	0.8882	75.5611	251.628	177.747
ENSG00000058673	ZC3H11A	0.268789	0.000125399	0.283595	7.19888e-05	0.0148056	0.852094	2990.29	3833.97	3874.94
ENSG00000134265	NAPG	0.411678	0.000125685	0.370547	0.000879323	-0.0411306	0.712459	475.283	697.176	661.728
ENSG00000102554	KLF5	-0.93554	0.00012576	-0.972782	9.1485e-05	-0.0372422	0.903932	335.961	134.986	139.475
ENSG00000179144	GIMAP7	-1.69798	0.000126034	0.266297	0.671583	1.96428	1.87054e-06	106.456	13.4923	103.027
ENSG00000099194	SCD	0.77032	0.000126237	0.525183	0.0153619	-0.245138	0.160399	1678.57	2938.45	2274.83
ENSG00000134824	FADS2	0.88207	0.000126587	0.773197	0.00123684	-0.108873	0.655074	769.057	1408.47	1116.54
ENSG00000187068	C3orf70	0.917819	0.000126683	0.494618	0.0662579	-0.423201	0.0322311	272.46	597.807	391.522
ENSG00000091129	NRCAM	1.23514	0.000126934	1.21758	0.000222657	-0.0175648	0.968273	40.319	136.014	114.91
ENSG00000130956	HABP4	-0.421993	0.00012722	-0.303756	0.00986259	0.118236	0.216188	764.325	549.614	580.954
ENSG00000215712	TMEM242	-0.368014	0.000128394	-0.235538	0.0246105	0.132476	0.0923065	410.15	345.228	383.079
ENSG00000096654	ZNF184	0.500919	0.00012852	0.632703	1.22743e-06	0.131784	0.223011	94.5813	151.172	162.864
ENSG00000131069	ACSS2	-0.43811	0.000128525	-0.471013	5.24822e-05	-0.0329031	0.791449	463.588	319.095	309.295
ENSG00000128917	DLL4	-1.54341	0.000128778	0.119333	0.85109	1.66274	1.57607e-06	69.6047	10.5242	48.1851
ENSG00000126264	HCST	-1.30445	0.000129211	-0.104838	0.844261	1.19961	1.44805e-05	52.363	12.0203	28.9754
ENSG00000081760	AACS	0.517113	0.00012923	0.299868	0.0459444	-0.217245	0.0449875	489.29	724.587	584.235
ENSG00000088833	NSFL1C	-0.284295	0.000129598	-0.353622	2.05451e-06	-0.0693278	0.292818	1591	1223.16	1171.46
ENSG00000083782	EPYC	1.17238	0.000130057	0.847282	0.00951992	-0.325097	0.26492	98.428	276.167	229.322
ENSG00000089057	SLC23A2	0.530157	0.000130057	0.352854	0.0187628	-0.177304	0.128039	1489.09	2142.92	1819.68
ENSG00000125885	MCM8	-0.561925	0.000130266	-0.39624	0.011826	0.165686	0.191759	163.938	120.609	136.5
ENSG00000206492	GNL1	-0.928379	0.000131758	-0.947543	0.000140322	-0.0191644	0.952133	163.739	91.0488	74.7109
ENSG00000167565	SERTAD3	-0.486771	0.000131955	-0.526037	4.92491e-05	-0.039266	0.776075	268.904	188.62	175.434
ENSG00000161149	TUBA3FP	0.802689	0.000132298	0.650838	0.00320842	-0.151851	0.418873	21.7544	32.0276	28.6574
ENSG00000213614	HEXA	0.490777	0.000132547	0.303935	0.0311029	-0.186842	0.0758896	3419.38	4924.48	3970.18
ENSG00000148339	SLC25A25	-0.763551	0.000133447	-0.636427	0.0023736	0.127124	0.520357	210.655	130.959	137.673
ENSG00000130962	PRRG1	-0.770009	0.00013381	-0.394544	0.0840896	0.375465	0.0209713	216.034	115.027	164.632
ENSG00000277443	MARCKS	-1.30647	0.00013381	0.438188	0.298143	1.74465	1.14256e-10	605.872	141.809	552.336
ENSG00000180257	ZNF816	0.503575	0.000134332	0.274069	0.064274	-0.229507	0.0228174	117.433	173.885	161.586
ENSG00000074800	ENO1	0.520147	0.00013465	0.288686	0.0585367	-0.231462	0.0337363	25464.1	39772	34100.3
ENSG00000074219	TEAD2	-0.650809	0.000135594	-0.934372	3.11534e-08	-0.283563	0.0405094	1232.25	665.382	527.253
ENSG00000123064	DDX54	-0.576843	0.000136206	-0.689616	5.77878e-06	-0.112773	0.428747	1237.93	675.344	654.764
ENSG00000113494	PRLR	-1.53651	0.000138299	-1.63701	5.86452e-05	-0.100498	0.857093	197.948	46.182	33.4289
ENSG00000152683	SLC30A6	0.377367	0.000138412	0.397799	8.05847e-05	0.0204322	0.854709	515.24	772.455	793.656
ENSG00000003400	CASP10	-1.29348	0.000138447	-0.222982	0.640648	1.0705	0.000125852	84.0174	21.476	60.7842
ENSG00000182580	EPHB3	0.824525	0.000138447	0.373855	0.13775	-0.450669	0.00859683	289.414	512.325	352.651
ENSG00000228638	FCF1P2	0.690688	0.000138878	0.721556	8.97424e-05	0.0308677	0.878923	37.7171	68.38	70.4669
ENSG00000090530	P3H2	0.904356	0.000139385	0.938077	0.000107872	0.033721	0.910215	349.164	723.915	769.046
ENSG00000117707	PROX1	-1.65824	0.000139578	-0.658603	0.196312	0.999641	0.02272	13.9603	2.73213	5.69202
ENSG00000052841	TTC17	0.386044	0.00014126	0.210903	0.0642217	-0.175141	0.0284039	1411.78	1736.8	1594.25
ENSG00000122254	HS3ST2	-1.54242	0.00014126	0.198456	0.738496	1.74087	5.56629e-07	46.7243	7.92465	37.1478
ENSG00000153044	CENPH	-0.724345	0.000141958	-0.652647	0.000949311	0.0716985	0.730594	88.2266	59.4415	62.5148
ENSG00000104980	TIMM44	-0.410366	0.000142423	-0.33001	0.00368534	0.0803562	0.426913	372.582	235.762	248.684
ENSG00000189241	TSPYL1	0.389587	0.000143026	0.132252	0.296127	-0.257335	0.000697634	1124.06	1602.31	1326.82
ENSG00000154127	UBASH3B	0.868198	0.0001435	0.880609	0.000163502	0.0124113	0.966693	415.364	808.161	816.643
ENSG00000132622	HSPA12B	-1.57791	0.000143718	0.433602	0.410864	2.01152	1.9457e-08	58.117	8.5308	52.5153
ENSG00000260914	RP11-343C2.11	-0.324821	0.000145292	-0.289637	0.00111128	0.0351845	0.690865	453.252	331.185	330.961
ENSG00000188211	NCR3LG1	-0.887155	0.000145336	-0.444759	0.0936587	0.442396	0.0208214	98.3352	52.9557	75.1087
ENSG00000241258	CRCP	-0.371782	0.000145588	-0.329358	0.00120814	0.0424233	0.672681	610.801	481.666	499.583
ENSG00000164188	RANBP3L	0.974939	0.000148234	1.07439	3.6503e-05	0.099454	0.727366	217.048	468.59	449.551
ENSG00000160271	RALGDS	-0.838144	0.000148284	-0.843673	0.000192314	-0.00552867	0.98447	1826.05	815.384	809.165
ENSG00000105929	ATP6V0A4	1.53068	0.000148413	1.22794	0.00357285	-0.30274	0.478708	2.09344	10.4909	10.7799
ENSG00000188643	S100A16	-0.604129	0.000148413	-0.276451	0.135214	0.327678	0.00831638	715.628	419.374	506.734
ENSG00000164088	PPM1M	-0.404714	0.000149651	-0.366092	0.000939885	0.0386219	0.733712	682.031	494.146	496.204
ENSG00000196793	ZNF239	0.675258	0.000149997	0.512507	0.00664226	-0.162751	0.289239	52.8542	90.9401	84.4464
ENSG00000069966	GNB5	-0.406117	0.000151397	-0.465924	1.69662e-05	-0.0598068	0.571062	656.103	475.209	485.248
ENSG00000085514	PILRA	-1.12626	0.000151648	-0.232241	0.567445	0.894016	0.000161989	78.4123	23.6554	44.0874
ENSG00000162598	C1orf87	-1.37929	0.000152741	-1.1608	0.00214834	0.218491	0.601758	56.1918	15.287	18.7223
ENSG00000053501	USE1	-0.415406	0.000152838	-0.538449	9.17412e-07	-0.123042	0.193727	448.761	311.234	283.543
ENSG00000081237	PTPRC	-1.46071	0.000152911	0.633577	0.15864	2.09428	6.21063e-11	170.83	38.4758	213.385
ENSG00000133134	BEX2	-1.10762	0.000153407	-1.73031	1.63725e-09	-0.622688	0.0109324	426.305	165.758	107.627
ENSG00000214753	HNRNPUL2	0.222936	0.000153584	0.237682	7.28874e-05	0.0147453	0.817598	1862.22	2393.78	2342.75
ENSG00000067182	TNFRSF1A	-0.48206	0.000153605	-0.512142	7.91157e-05	-0.0300816	0.833054	5288.17	3135.06	3162.39
ENSG00000121057	AKAP1	-0.602544	0.000154155	-0.819481	2.24989e-07	-0.216936	0.104927	1199.39	605.111	540.761
ENSG00000090273	NUDC	-0.352096	0.000154882	-0.483965	1.6553e-07	-0.131869	0.0837932	2020.51	1470.86	1342.76
ENSG00000099991	CABIN1	0.506148	0.000154942	0.513584	0.000178082	0.00743616	0.964816	677.256	785.437	739.812
ENSG00000180855	ZNF443	0.661844	0.000154942	0.552582	0.0026146	-0.109262	0.485483	33.9323	56.7756	50.6019
ENSG00000159140	SON	0.404699	0.000154989	0.24307	0.0396659	-0.161629	0.0617155	4452.24	5756.67	5191.57
ENSG00000122547	EEPD1	-0.818668	0.000155037	-0.928161	2.24308e-05	-0.109494	0.629869	159.753	86.1405	81.1526
ENSG00000077150	NFKB2	-0.434634	0.000155045	-0.404384	0.000661432	0.0302502	0.810463	549.223	342.318	353.369
ENSG00000103353	UBFD1	0.407408	0.000155057	0.296826	0.00991118	-0.110582	0.236164	647.862	901.034	774.031
ENSG00000136026	CKAP4	0.462376	0.000155149	0.381696	0.00294074	-0.0806801	0.487847	3509.74	4834.06	4309.29
ENSG00000203722	RAET1G	0.633854	0.000155149	0.347431	0.0648186	-0.286423	0.0264656	60.2419	87.5551	75.2816
ENSG00000101187	SLCO4A1	-1.56777	0.00015527	-0.449998	0.389488	1.11777	0.0037616	21.7699	4.45477	13.9553
ENSG00000135218	CD36	-1.67673	0.00015527	-0.14803	0.829316	1.5287	0.000337907	676.617	176.345	484.425
ENSG00000177200	CHD9	0.453717	0.000156294	0.444299	0.000317273	-0.00941793	0.949935	1902.02	2678.62	2737.64
ENSG00000225663	FAM195B	-0.603447	0.000156461	-0.260191	0.166047	0.343256	0.00543057	694.457	398.781	503.183
ENSG00000168291	PDHB	0.433479	0.000157714	0.543755	2.19348e-06	0.110275	0.272715	596.728	797.833	832.779
ENSG00000262655	SPON1	1.14435	0.000158124	1.08286	0.000514491	-0.0614909	0.872451	1043.95	2587.61	2220.17
ENSG00000103275	UBE2I	-0.272784	0.000158352	-0.212457	0.00539905	0.060327	0.353714	1469	1180.97	1247.83
ENSG00000150048	CLEC1A	-1.50729	0.000158899	0.105883	0.867119	1.61317	2.11202e-06	19.5261	3.58286	17.9129
ENSG00000277363	SRCIN1	-1.373	0.000159018	-1.34724	0.000293889	0.0257616	0.961472	53.2879	13.5716	9.89829
ENSG00000040933	INPP4A	0.445002	0.00016126	0.349624	0.00506529	-0.0953781	0.37491	590.437	774.935	703.932
ENSG00000261652	C15orf65	0.841947	0.00016126	0.982014	1.09862e-05	0.140066	0.504797	37.5863	68.2842	74.1866
ENSG00000147799	ARHGAP39	0.816782	0.000161795	0.88314	5.7562e-05	0.0663585	0.772881	33.7068	56.7832	58.8147
ENSG00000126561	STAT5A	-0.49063	0.000162167	-0.409958	0.00264232	0.0806719	0.522474	819.595	518.19	565.8
ENSG00000137817	PARP6	-0.479419	0.000162305	-0.590292	3.68336e-06	-0.110873	0.336547	1083.96	653.566	630.068
ENSG00000103811	CTSH	-1.12797	0.000162516	0.12385	0.785542	1.25182	4.29615e-08	362.716	113.108	273.503
ENSG00000138185	ENTPD1	-1.364	0.000163261	0.804617	0.0431601	2.16862	2.64269e-13	345.201	61.6758	439.241
ENSG00000102977	ACD	-0.516962	0.00016408	-0.638321	3.52829e-06	-0.12136	0.331394	274.696	168.965	155.331
ENSG00000172977	KAT5	-0.308912	0.00016408	-0.411427	4.73702e-07	-0.102515	0.134346	1247.03	962.517	880.128
ENSG00000204186	ZDBF2	0.559231	0.00016408	0.384492	0.0162659	-0.174739	0.164922	277.929	454.18	418.344
ENSG00000095380	NANS	-0.546629	0.000164196	-0.420508	0.00620936	0.12612	0.339427	776.745	515.457	541.421
ENSG00000197903	HIST1H2BK	-0.69705	0.000164466	-0.87715	2.21316e-06	-0.1801	0.286542	163.216	90.8045	85.9875
ENSG00000025770	NCAPH2	-0.316259	0.000164482	-0.381953	6.27103e-06	-0.0656941	0.396606	537.593	401.707	372.52
ENSG00000118276	B4GALT6	0.680935	0.000164982	0.47516	0.0144727	-0.205775	0.187702	297.111	529.702	494.618
ENSG00000149177	PTPRJ	-0.830516	0.000165703	0.0775763	0.820736	0.908092	1.88536e-08	193.907	112.258	188.871
ENSG00000146540	C7orf50	-0.583785	0.000165737	-0.800609	2.03239e-07	-0.216824	0.0932422	1205.61	683.946	610.998
ENSG00000281123	FCGBP	-1.45488	0.000165737	0.0604316	0.926552	1.51531	3.06404e-06	120.422	36.3984	114.906
ENSG00000177694	NAALADL2	0.816166	0.000166141	0.808416	0.000275572	-0.00775023	0.977655	152.353	292.518	297.231
ENSG00000117411	B4GALT2	0.499676	0.000166269	0.542551	5.75331e-05	0.0428755	0.764269	1152.11	1559.42	1566.16
ENSG00000138400	MDH1B	0.822606	0.000166414	0.493406	0.0409849	-0.3292	0.0614292	43.0237	77.6741	59.0899
ENSG00000169689	STRA13	-0.523994	0.000166661	-0.61804	1.06737e-05	-0.0940465	0.480263	461.043	295.351	270.395
ENSG00000183662	FAM19A1	1.45246	0.000167023	1.18341	0.00337659	-0.269053	0.525735	8.18116	45.5161	36.3586
ENSG00000183963	SMTN	-0.668904	0.000167023	-0.701486	0.000109319	-0.0325819	0.87854	1519.42	642.667	642.602
ENSG00000173039	RELA	-0.530465	0.000167904	-0.677886	1.5185e-06	-0.147421	0.233549	2676.01	1388.41	1313.31
ENSG00000035115	SH3YL1	0.338764	0.000168333	0.0651132	0.604183	-0.27365	1.89763e-05	415.115	558.309	462.718
ENSG00000143486	EIF2D	-0.334783	0.000168531	-0.507399	7.18138e-09	-0.172615	0.0123117	1616.57	1269.36	1146.32
ENSG00000116701	NCF2	-1.46618	0.000168801	0.338295	0.512904	1.80448	2.69097e-08	133.111	26.4676	107.375
ENSG00000145283	SLC10A6	-1.5902	0.000169402	-1.00682	0.0265315	0.583377	0.209057	8.23357	1.97763	3.1079
ENSG00000197965	MPZL1	0.419297	0.000170283	0.565569	3.47873e-07	0.146272	0.113914	1805.36	2699.74	2806.16
ENSG00000100365	NCF4	-1.64842	0.000170662	0.589613	0.262639	2.23803	1.61823e-08	54.0354	5.59729	50.9294
ENSG00000167291	TBC1D16	-0.595856	0.000171186	-0.327585	0.0658214	0.268272	0.0356977	700.41	433.221	508.337
ENSG00000154783	FGD5	-0.758255	0.00017148	-0.285896	0.24144	0.47236	0.00251463	1019.6	502.092	716.525
[truncated: 36,011 more rows]
